# Supplementary material for: Integrative analysis of multi-omics data reveals the heterogeneity and signatures of immune therapy for small cell lung cancer
Source: Research Square preprint supplement (doi:10.21203/rs.3.rs-148857/v1), 2021-01-22
Supplement: Supplementary file 2 [file a0092ca6f0b1010c9ad2208b.xlsx]

## Sheet: Sheet1
Number	Sex	Age	Smoking（Pack Year）	Lung Lobe	Diagnosis	TNM Stage	Pre-Immunotherapy	Immunotherapy Drug（Dosages）	Medication Time	Evaluation Time（cycles）	Evaluation Criteria(RECIST)	Following-Up
1	Male	52	Non	LL	SCLC(ED)	IV	EC(4 cycles)	Pembrolizumab（100mg）+Ipilimumab(50mg)	2017-02-16	2017/3/29（SD+）→2017/5/25（SD）→2017/7/7	SD+	2018/05 Dead
2	Male	64	1600	RL	SCLC(ED)	IV	EC(6 cycles)	Nivolumab(200mg)	2018-09-01	2018/10/16（PD）	PD	2019/4 Dead
3	Male	60	Non	RL	SCLC(ED)	IV	EC(6 cycles)	Nivolumab(200mg)+Ipilimumab(50mg)	2018-03-26	2018/4/3（PD）→2018/5/22	PD	2018/8 Dead
4	Male	63	200	LL	SCLC(ED)	IV	EC(6 cycles)	Nivolumab(200mg)	2018-08-26	2018/10/12（PR）→2018/10/16	PR	Loss of follow-up
5	Male	72	900	LL	SCLC(ED)	IV	EC(4 cycles)	Pembrolizumab(200mg)	2019-09-30	2019/11/19（PR）→2019/12/27	PR	2019/5 Dead
6	Male	66	1600	RL	SCLC(ED)	IV	EC(6 cycles)	Atezolizumab(1200mg)	2019-03-08	2019/4/23（PR）→2019/6/11（PR）→2019/7/15→2019/8/21→2019/9/16→2019/10/30(PR）→2020/3/26（PD）	PR	2020/10 Dead
7	Male	45	800-1200	RL	SCLC(ED)	IV	EC(12cycles)→ Irinotecan+Nedaplatin(1 cycle）	Nivolumab(200mg)+Ipilimumab(50mg)	2018-02-01	2018/3/16(PR)→2018/4/12(PD)	PR	2019/2 Dead
8	Male	46	1600	RL	SCLC(ED)	IV	EC(3 cycles)→Albumin Paclitaxel（2 cycles）	Nivolumab(200mg)+Ipilimumab(100mg)	2016-07-10	2016/9/6(PR)→2017/2/18(SD)→2017/6/30(SD)→2017/10/17(SD)→2018/3/9→2018/11/8→2019/9/16	PR	2019/12 Dead
9	Male	64	800	RL	SCLC(ED)	IV	Non	Carrilizumab(SHR-1210)(200mg)	2018-10-23	2018/11/22（SD-）→2019/1/18→2019/3/14	SD-	2019/11 Dead
10	Male	65	600	LL	SCLC(ED)	IV	EP(6 cycles)→IP（2 cycles）→EP(5 cycles)	Pembrolizumab(200mg)	2017-06-28	2017/8/17（PD）	PD	2018/1 Dead
11	Female	77	180	LL	SCLC(ED)	IV	EC(1 cycle)→EP(3 cycles)	Nivolumab(200mg)+Ipilimumab(100mg)	2018-10-02	2018-11-4(False PD)→2018-12-17→2019/1/4→2019/2/20→2019/6/4→2019/11/22→2020/6/17(CR）	CR	Alive
12	Male	66	600-900	RL	SCLC(ED)	IV	EP(2 cycles)→Irinotecan+Nedaplatin（4cycles）→EP（2 cycles）	Pembrolizumab(100mg)	2018-03-22	2018/5/5(PR)→2018/6/26→2018/8/9(PD)	PR	2019/3/22 Dead
13	Male	48	400	LL	SCLC(ED)	IV	EP(2 cycles)	Atezolizumab(1200mg)	2018-03-27	2018/5/4→2018/7/11（SD-）	SD-	2019/7 Dead
14	Male	48	Non	RL	SCLC(ED)	IV	EC(6 cycles)	Nivolumab(100mg)	2018-09-05	2018/10/31（PR）→2019/1/14→2019/4/20→2019/4/24	PR	Recurrenc Alive
15	Male	54	600-1200	RL	SCLC(ED)	IV	EC（5 cycles）	Pembrolizumab(100mg)	2018-03-07	2018/4/20(SD+)	SD+	2018/11 Dead
16	Female	51	Non	RL	SCLC(ED)	IV	EC（6 cycles）	Nivolumab(200mg)+Ipilimumab(50mg)	2018-04-16	2018/7/1（SD+）→2018/9/11	SD+	Loss of follow-up
17	Female	78	Non	RL	SCLC(ED)	IV	EC（4 cycles）	Durvalumab(1500mg)	2018-08-22	2018/10/3(PR)→2018/11/18→2019/1/12	PR	2020/3 Dead
18	Male	77	400	RL	SCLC(ED)	IV	EP（4 cycles）→Apatinib+Tegafur（1 cycle）	Nivolumab(100mg)	2019-02-26	2019-04-19（SD+）	SD+	2019/12 Dead
19	Male	82	400	RL	SCLC(ED)	IV	EC(3 cycles)	Pembrolizumab(20+R[1]C0mg)	2019-03-15	2019/5/22(PR)→2019/6/25→2019/7/21→2019/10/31(SD-)→2019/12/15(SD)	PR	2019/12/31 Dead
20	Male	52	600	LL	SCLC(ED)	IV	Paclitaxel+Cisplatin（2 cycles）→EP（6 cycles）	Nivolumab(200mg)	2018-01-04	2018/2/22（SD-）→2018/4/10（SD）→2018/5/24（SD）	SD-	2019/7 Dead
21	Male	64	2000	LL	SCLC(ED)	IV	EP(6 cycles)	Sintilimab(200mg)	2019-11-25	2019/10/13(PR)→2019/11/20(PR)→2020/2/12→2020/3/22→2020/4/5→2020/6/14	PR	2020/10 Dead
22	Male	61	2400	RL	SCLC(ED)	IV	EP（4 cycles）→Temozolomide（6 cycles）→Irinotecan（2 cycles）	Pembrolizumab(200mg)	2019-05-22	2019/7/6(SD-)→2019/9/28	SD-	Alive
23	Male	56	600	LL	SCLC(ED)	IV	EP（4 cycles）	Durvalumab(1500mg)+Tremelimub(75mg)	2018-11-04	2018/12/15(PR)→2019/1/28→2019/2/14→2019/3/9	PR	2019/10 Dead
24	Male	56	900-1200	LL	SCLC(ED)	IV	EP(8 cycles)→Irinotecan+Nedaplatin（4 cycles)	Pembrolizumab(200mg)+Ipilimumab(50mg)	2019-03-18	2019/5/4(SD-)→2019/6/26→2019/12/26→2020/9/7	SD-	Alive
25	Male	51	600	LL	SCLC(ED)	IV	EC(5 cycles)	Nivolumab(200mg)	2019-03-12	2019/5/12(PR)→2019/6/30→2019/7/29(SD-)→2019/9/19	PR	Alive
26	Male	73	Non	LL	SCLC(ED)	IV	EC(4 cycles)	Atezolizumab(1200mg)	2019-03-31	2019/5/15(PR)→2019/8/21	PR	2019/11 Dead
27	Male	66	1200	RL	SCLC(ED)	IV	EP(4 cycles)	Nivolumab(240mg)+Ipilimumab(100mg)	2017-12-23	2018/2/6(False PD)→2018/3/13(PR)→2018/4/28→2018/6/6(PR)→2018/11/25（SD）→2019/2/15→2019/7/31→2019/10/24→2019/12/20(PR）	PR	Alive
28	Male	79	500	RL	SCLC(ED)	IV	Ecotinib(1 cycle)→osimertinib (3 cycles)	Pembrolizumab(150mg)	2017-07-10	2017/8/17（PR）→2017/8/28（PR）→2017/11/21（PD）→2018/1/13→2018/2/4	PR	2017/10 Dead
