# Supplementary material for: Integrative analysis of multi-omics data reveals the heterogeneity and signatures of immune therapy for small cell lung cancer
Source: Research Square preprint supplement (doi:10.21203/rs.3.rs-148857/v1), 2021-01-22
Supplement: Supplementary file 4 [file 447c8d548a608a559a9f50eb.xlsx]

## Sheet: Mutation_Immune
gene	Immune	freq	other	other_freq	pvalue1_234
NEUROD1	5	0.185185	0	0	0.000332978
RASGRF1	5	0.185185	0	0	0.000332978
CC01	4	0.148148	0	0	0.00210631
LMBRD1	4	0.148148	0	0	0.00210631
OR4M2	4	0.148148	0	0	0.00210631
SLC8A2	4	0.148148	0	0	0.00210631
TMEM131	4	0.148148	0	0	0.00210631
ABCC12	5	0.185185	1	0.0113636	0.00222616
KCNJ3	5	0.185185	1	0.0113636	0.00222616
CD163	5	0.185185	2	0.0227273	0.00857743
LRP1	5	0.185185	2	0.0227273	0.00857743
OR8G1	5	0.185185	2	0.0227273	0.00857743
SYTL5	5	0.185185	2	0.0227273	0.00857743
ABCB1	4	0.148148	1	0.0113636	0.012094
DENND1B	4	0.148148	1	0.0113636	0.012094
REG3G	4	0.148148	1	0.0113636	0.012094
RXFP1	4	0.148148	1	0.0113636	0.012094
ANP32C	3	0.111111	0	0	0.0131963
APOL5	3	0.111111	0	0	0.0131963
ARHGEF5	3	0.111111	0	0	0.0131963
CCDC82	3	0.111111	0	0	0.0131963
FAM181B	3	0.111111	0	0	0.0131963
GPATCH1	3	0.111111	0	0	0.0131963
ITSN2	3	0.111111	0	0	0.0131963
MAEL	3	0.111111	0	0	0.0131963
MANSC1	3	0.111111	0	0	0.0131963
MOXD1	3	0.111111	0	0	0.0131963
NINL	3	0.111111	0	0	0.0131963
NXPE3	3	0.111111	0	0	0.0131963
OR11G2	3	0.111111	0	0	0.0131963
OS9	3	0.111111	0	0	0.0131963
OTUD4	3	0.111111	0	0	0.0131963
PKD1L3	3	0.111111	0	0	0.0131963
PLRG1	3	0.111111	0	0	0.0131963
PRX	3	0.111111	0	0	0.0131963
RGAG1	3	0.111111	0	0	0.0131963
RNF103	3	0.111111	0	0	0.0131963
RPS6KC1	3	0.111111	0	0	0.0131963
SFSWAP	3	0.111111	0	0	0.0131963
SGCG	3	0.111111	0	0	0.0131963
SNX31	3	0.111111	0	0	0.0131963
VWA5B2	3	0.111111	0	0	0.0131963
ZNF642	3	0.111111	0	0	0.0131963
ZNF792	3	0.111111	0	0	0.0131963
ZP4	5	0.185185	3	0.0340909	0.0233824
ADAMTSL1	4	0.148148	2	0.0227273	0.0385499
CSGAL0CT1	4	0.148148	2	0.0227273	0.0385499
DNHD1	4	0.148148	2	0.0227273	0.0385499
KCNU1	4	0.148148	2	0.0227273	0.0385499
MAGEB18	4	0.148148	2	0.0227273	0.0385499
OR4A15	4	0.148148	2	0.0227273	0.0385499
PCDHB6	4	0.148148	2	0.0227273	0.0385499
PLX04	4	0.148148	2	0.0227273	0.0385499
SYT10	4	0.148148	2	0.0227273	0.0385499
TNKS1BP1	4	0.148148	2	0.0227273	0.0385499
WDR17	4	0.148148	2	0.0227273	0.0385499
ZNF254	4	0.148148	2	0.0227273	0.0385499
AFF2	5	0.185185	4	0.0454545	0.050558
ZNF407	5	0.185185	4	0.0454545	0.050558
FBN2	7	0.259259	8	0.0909091	0.0517098
D0H7	10	0.37037	15	0.170455	0.052821
D0H9	6	0.222222	6	0.0681818	0.0535439
HUWE1	6	0.222222	6	0.0681818	0.0535439

## Sheet: Mutation_Classic
gene	Classic	freq	other	other_freq	pvalue2_134
OBSCN	10	0.163934	0	0	0.00539902
PI4KA	0	0	7	0.12963	0.0120402
GBA3	8	0.131148	0	0	0.0167717
FSIP2	14	0.229508	3	0.0555556	0.018284
ZNF407	1	0.0163934	8	0.148148	0.0227503
HCN1	15	0.245902	4	0.0740741	0.0261034
TRIP12	7	0.114754	0	0	0.0294074
TRRAP	7	0.114754	0	0	0.0294074
DPP6	9	0.147541	1	0.0185185	0.0340827
CSMD3	33	0.540984	18	0.333333	0.0404662
NEUROD1	0	0	5	0.0925926	0.048623
RASGRF1	0	0	5	0.0925926	0.048623
GFI1	0	0	5	0.0925926	0.048623
KIAA2022	0	0	5	0.0925926	0.048623
PASK	0	0	5	0.0925926	0.048623
ASB18	0	0	5	0.0925926	0.048623
NIPBL	0	0	5	0.0925926	0.048623
REG3A	0	0	5	0.0925926	0.048623
CYP4F22	6	0.0983607	0	0	0.0515189
DDX53	6	0.0983607	0	0	0.0515189
KDR	6	0.0983607	0	0	0.0515189
PHACTR3	6	0.0983607	0	0	0.0515189
TRPC3	6	0.0983607	0	0	0.0515189
TRIM58	8	0.131148	1	0.0185185	0.0578953

## Sheet: Mutation_Variant 1
gene	Variant1	freq	other	other_freq	pvalue3_124
PI4KA	5	0.277778	2	0.0206186	0.00025794
CLCN5	3	0.166667	0	0	0.00107845
FAM208A	3	0.166667	0	0	0.00107845
GPR101	3	0.166667	0	0	0.00107845
SH3GLB2	3	0.166667	0	0	0.00107845
SEMA3E	4	0.222222	2	0.0206186	0.00312216
SLC2A13	4	0.222222	2	0.0206186	0.00312216
POTEF	5	0.277778	4	0.0412371	0.0031381
RYR3	7	0.388889	10	0.103093	0.00550316
BMP3	3	0.166667	1	0.0103093	0.00867209
DACT3	3	0.166667	1	0.0103093	0.00867209
OR51I1	3	0.166667	1	0.0103093	0.00867209
PLD1	3	0.166667	1	0.0103093	0.00867209
ATP6V0A4	4	0.222222	3	0.0309278	0.00985603
ASMT	2	0.111111	0	0	0.0197922
C10orf2	2	0.111111	0	0	0.0197922
C14orf129	2	0.111111	0	0	0.0197922
CACNB1	2	0.111111	0	0	0.0197922
CCRN4L	2	0.111111	0	0	0.0197922
CHST1	2	0.111111	0	0	0.0197922
CPXM2	2	0.111111	0	0	0.0197922
DAGLA	2	0.111111	0	0	0.0197922
DDX1	2	0.111111	0	0	0.0197922
DF05	2	0.111111	0	0	0.0197922
DSEL	2	0.111111	0	0	0.0197922
ELK1	2	0.111111	0	0	0.0197922
FAM53B	2	0.111111	0	0	0.0197922
FBXL20	2	0.111111	0	0	0.0197922
FETUB	2	0.111111	0	0	0.0197922
FGD4	2	0.111111	0	0	0.0197922
GPR142	2	0.111111	0	0	0.0197922
INTS6	2	0.111111	0	0	0.0197922
ISG20L2	2	0.111111	0	0	0.0197922
ISY1-RAB43	2	0.111111	0	0	0.0197922
KC0B1	2	0.111111	0	0	0.0197922
KRT27	2	0.111111	0	0	0.0197922
LARP1	2	0.111111	0	0	0.0197922
LZTS2	2	0.111111	0	0	0.0197922
MBL2	2	0.111111	0	0	0.0197922
MFN1	2	0.111111	0	0	0.0197922
MIA3	2	0.111111	0	0	0.0197922
MLIP	2	0.111111	0	0	0.0197922
MYEF2	2	0.111111	0	0	0.0197922
NKD1	2	0.111111	0	0	0.0197922
NPHP1	2	0.111111	0	0	0.0197922
NYAP1	2	0.111111	0	0	0.0197922
OR4S1	2	0.111111	0	0	0.0197922
OR52A1	2	0.111111	0	0	0.0197922
PAX9	2	0.111111	0	0	0.0197922
POLR2B	2	0.111111	0	0	0.0197922
PON3	2	0.111111	0	0	0.0197922
PRRT3	2	0.111111	0	0	0.0197922
PSMF1	2	0.111111	0	0	0.0197922
PTCHD4	2	0.111111	0	0	0.0197922
PYGB	2	0.111111	0	0	0.0197922
RANBP17	2	0.111111	0	0	0.0197922
RASIP1	2	0.111111	0	0	0.0197922
REXO1	2	0.111111	0	0	0.0197922
RIC8B	2	0.111111	0	0	0.0197922
R0SE9	2	0.111111	0	0	0.0197922
SAG	2	0.111111	0	0	0.0197922
SEL1L	2	0.111111	0	0	0.0197922
SEPT1	2	0.111111	0	0	0.0197922
SERPING1	2	0.111111	0	0	0.0197922
SLC7A3	2	0.111111	0	0	0.0197922
SMPD1	2	0.111111	0	0	0.0197922
SNRPD3	2	0.111111	0	0	0.0197922
SYT13	2	0.111111	0	0	0.0197922
TCTE1	2	0.111111	0	0	0.0197922
UGT1A8	2	0.111111	0	0	0.0197922
WDR34	2	0.111111	0	0	0.0197922
WDR4	2	0.111111	0	0	0.0197922
WFDC9	2	0.111111	0	0	0.0197922
ZNF383	2	0.111111	0	0	0.0197922
ZSWIM6	2	0.111111	0	0	0.0197922
ROS1	4	0.222222	4	0.0412371	0.0233587
TRHDE	4	0.222222	4	0.0412371	0.0233587
STON1-GTF2A1L	5	0.277778	7	0.0721649	0.0277415
MYH4	5	0.277778	7	0.0721649	0.0277415
CR2	3	0.166667	2	0.0206186	0.0306731
UBE2NL	3	0.166667	2	0.0206186	0.0306731
XPNPEP2	3	0.166667	2	0.0206186	0.0306731
KCNK10	4	0.222222	5	0.0515464	0.0456807
FREM3	4	0.222222	5	0.0515464	0.0456807
F8	4	0.222222	5	0.0515464	0.0456807
FBN3	5	0.277778	8	0.0824742	0.0457104

## Sheet: Mutation_Variant 2
gene	Variant2	freq	other	other_freq	pvalue4_123
TIE1	3	0.333333	1	0.00943396	3.41279e-05
CD38	2	0.222222	0	0	0.000359444
IGSF10	3	0.333333	3	0.0283019	0.00152387
PRDM6	2	0.222222	1	0.00943396	0.00585256
ADAMTS13	2	0.222222	1	0.00943396	0.00585256
MYCT1	2	0.222222	1	0.00943396	0.00585256
CSMD3	0	0	51	0.481132	0.0146883
KIAA0528	2	0.222222	2	0.0188679	0.0245038
SCIN	2	0.222222	2	0.0188679	0.0245038
SLC12A3	2	0.222222	2	0.0188679	0.0245038
CBL	2	0.222222	3	0.0283019	0.0590834

## Sheet: CNV_Immune_freq>20%,P<0.01
	Immune	freq	other	prop1_pvalue
CHMP4B	17	0.772727	29	0.00321957
E2F1	17	0.772727	29	0.00321957
NECAB3	17	0.772727	29	0.00321957
PXMP4	17	0.772727	29	0.00321957
TRPC4AP	17	0.772727	29	0.00321957
ZNF341	17	0.772727	29	0.00321957
ADRA2B	16	0.727273	21	0.000387951
APLNR	16	0.727273	21	0.000387951
ASTL	16	0.727273	21	0.000387951
CIAO1	16	0.727273	21	0.000387951
CLP1	16	0.727273	20	0.000232037
DUSP2	16	0.727273	21	0.000387951
ITPRIPL1	16	0.727273	21	0.000387951
LRRC55	16	0.727273	22	0.000630734
MED19	16	0.727273	20	0.000232037
NCAPH	16	0.727273	21	0.000387951
OR5AK2	16	0.727273	21	0.000387951
OR5AP2	16	0.727273	21	0.000387951
OR5I1	16	0.727273	21	0.000387951
OR5J2	16	0.727273	24	0.00154543
OR5M1	16	0.727273	21	0.000387951
OR5M10	16	0.727273	22	0.000630734
OR5M11	16	0.727273	22	0.000630734
OR5M3	16	0.727273	22	0.000630734
OR5M8	16	0.727273	22	0.000630734
OR5M9	16	0.727273	22	0.000630734
OR5T1	16	0.727273	23	0.000999235
OR5T2	16	0.727273	24	0.00154543
OR5T3	16	0.727273	24	0.00154543
OR8H1	16	0.727273	23	0.000999235
OR8H2	16	0.727273	21	0.000387951
OR8H3	16	0.727273	21	0.000387951
OR8J1	16	0.727273	21	0.000387951
OR8J3	16	0.727273	21	0.000387951
OR8K1	16	0.727273	21	0.000387951
OR8K5	16	0.727273	24	0.00154543
OR9G4	16	0.727273	21	0.000387951
PRG2	16	0.727273	21	0.000387951
PRG3	16	0.727273	21	0.000387951
RTN4RL2	16	0.727273	24	0.00154543
SERPING1	16	0.727273	22	0.000630734
SLC43A1	16	0.727273	24	0.00154543
SLC43A3	16	0.727273	21	0.000387951
SMTNL1	16	0.727273	21	0.000387951
SNRNP200	16	0.727273	21	0.000387951
SSRP1	16	0.727273	21	0.000387951
STARD7	16	0.727273	21	0.000387951
TIMM10	16	0.727273	21	0.000387951
TMEM127	16	0.727273	21	0.000387951
TNKS1BP1	16	0.727273	20	0.000232037
UBE2L6	16	0.727273	21	0.000387951
VPS37C	16	0.727273	24	0.00154543
YPEL4	16	0.727273	21	0.000387951
ZDHHC5	16	0.727273	21	0.000387951
ABI2	15	0.681818	23	0.00348532
ACADL	15	0.681818	23	0.00348532
ACTN3	15	0.681818	25	0.00750716
ACTR1B	15	0.681818	21	0.00147564
ACTR3	15	0.681818	20	0.000923236
ACVR1	15	0.681818	22	0.00229613
ACVR1C	15	0.681818	22	0.00229613
ACVR2A	15	0.681818	21	0.00147564
ACY3	15	0.681818	25	0.00750716
ADAM23	15	0.681818	23	0.00348532
ADRB3	15	0.681818	25	0.00750716
AFF3	15	0.681818	21	0.00147564
AGPS	15	0.681818	23	0.00348532
ALDH3B1	15	0.681818	25	0.00750716
ALDH3B2	15	0.681818	25	0.00750716
ANKAR	15	0.681818	23	0.00348532
ANKRD13D	15	0.681818	22	0.00229613
ANKRD23	15	0.681818	21	0.00147564
ANKRD36B	15	0.681818	21	0.00147564
ANKRD39	15	0.681818	21	0.00147564
ANKRD44	15	0.681818	23	0.00348532
AP5B1	15	0.681818	24	0.00517012
ARHGAP15	15	0.681818	21	0.00147564
ARHGEF10	15	0.681818	20	0.000923236
ARID5A	15	0.681818	21	0.00147564
ARL5A	15	0.681818	21	0.00147564
ARL6IP6	15	0.681818	22	0.00229613
ASH2L	15	0.681818	25	0.00750716
ASNSD1	15	0.681818	23	0.00348532
ATF2	15	0.681818	23	0.00348532
BANF1	15	0.681818	25	0.00750716
BAZ2B	15	0.681818	22	0.00229613
BBS1	15	0.681818	22	0.00229613
BEST1	15	0.681818	25	0.00750716
BMPR2	15	0.681818	23	0.00348532
BRF2	15	0.681818	25	0.00750716
BRMS1	15	0.681818	25	0.00750716
C11orf24	15	0.681818	25	0.00750716
C11orf68	15	0.681818	21	0.00147564
C11orf80	15	0.681818	24	0.00517012
C11orf86	15	0.681818	21	0.00147564
C2orf49	15	0.681818	21	0.00147564
C2orf66	15	0.681818	23	0.00348532
C2orf76	15	0.681818	20	0.000923236
C2orf80	15	0.681818	23	0.00348532
C2orf88	15	0.681818	23	0.00348532
CABP2	15	0.681818	22	0.00229613
CACNB4	15	0.681818	21	0.00147564
CARF	15	0.681818	23	0.00348532
CATSPER1	15	0.681818	25	0.00750716
CBWD2	15	0.681818	20	0.000923236
CCDC138	15	0.681818	21	0.00147564
CCDC148	15	0.681818	22	0.00229613
CCDC150	15	0.681818	23	0.00348532
CCDC173	15	0.681818	22	0.00229613
CCDC85B	15	0.681818	25	0.00750716
CCDC86	15	0.681818	24	0.00517012
CCDC87	15	0.681818	24	0.00517012
CCDC93	15	0.681818	20	0.000923236
CCNYL1	15	0.681818	23	0.00348532
CCS	15	0.681818	24	0.00517012
CD248	15	0.681818	25	0.00750716
CD28	15	0.681818	23	0.00348532
CD5	15	0.681818	25	0.00750716
CDC42EP2	15	0.681818	24	0.00517012
CDCA7	15	0.681818	22	0.00229613
CDK2AP2	15	0.681818	22	0.00229613
CFL1	15	0.681818	25	0.00750716
CHCHD5	15	0.681818	20	0.000923236
CHKA	15	0.681818	25	0.00750716
CHN1	15	0.681818	23	0.00348532
CHRNA1	15	0.681818	23	0.00348532
CHST10	15	0.681818	21	0.00147564
CIR1	15	0.681818	23	0.00348532
CKAP2L	15	0.681818	20	0.000923236
CLN8	15	0.681818	20	0.000923236
CNGA3	15	0.681818	21	0.00147564
CNIH2	15	0.681818	25	0.00750716
CNNM3	15	0.681818	21	0.00147564
CNNM4	15	0.681818	21	0.00147564
CNOT11	15	0.681818	21	0.00147564
CNTNAP5	15	0.681818	20	0.000923236
COA5	15	0.681818	21	0.00147564
COQ10B	15	0.681818	23	0.00348532
COX5B	15	0.681818	21	0.00147564
CPO	15	0.681818	23	0.00348532
CPS1	15	0.681818	23	0.00348532
CPT1A	15	0.681818	22	0.00229613
CREB1	15	0.681818	23	0.00348532
CREG2	15	0.681818	21	0.00147564
CRYGA	15	0.681818	23	0.00348532
CST6	15	0.681818	25	0.00750716
CTLA4	15	0.681818	23	0.00348532
CTNNA2	15	0.681818	22	0.00229613
CTSF	15	0.681818	25	0.00750716
CTSW	15	0.681818	25	0.00750716
CXCR4	15	0.681818	21	0.00147564
CYB561A3	15	0.681818	22	0.00229613
CYBRD1	15	0.681818	22	0.00229613
CYP20A1	15	0.681818	23	0.00348532
CYTIP	15	0.681818	22	0.00229613
DAPL1	15	0.681818	22	0.00229613
DBI	15	0.681818	20	0.000923236
DCAF17	15	0.681818	22	0.00229613
DDX18	15	0.681818	20	0.000923236
DLGAP2	15	0.681818	20	0.000923236
DLX1	15	0.681818	22	0.00229613
DLX2	15	0.681818	22	0.00229613
DNAH7	15	0.681818	23	0.00348532
DPF2	15	0.681818	24	0.00517012
DPP10	15	0.681818	20	0.000923236
DPP3	15	0.681818	22	0.00229613
DRAP1	15	0.681818	21	0.00147564
DTX4	15	0.681818	21	0.00147564
DYTN	15	0.681818	23	0.00348532
EDAR	15	0.681818	21	0.00147564
EEF1B2	15	0.681818	23	0.00348532
EHBP1L1	15	0.681818	25	0.00750716
EIF1AD	15	0.681818	24	0.00517012
EIF4EBP1	15	0.681818	25	0.00750716
EIF5B	15	0.681818	21	0.00147564
EN1	15	0.681818	20	0.000923236
EPB41L5	15	0.681818	20	0.000923236
EPC2	15	0.681818	21	0.00147564
ERBB4	15	0.681818	23	0.00348532
ERICH1	15	0.681818	20	0.000923236
ERICH2	15	0.681818	22	0.00229613
ERLIN2	15	0.681818	25	0.00750716
ERMN	15	0.681818	22	0.00229613
ESRRA	15	0.681818	24	0.00517012
EVX2	15	0.681818	23	0.00348532
FAHD2A	15	0.681818	21	0.00147564
FAHD2B	15	0.681818	21	0.00147564
FAM111A	15	0.681818	21	0.00147564
FAM111B	15	0.681818	21	0.00147564
FAM117B	15	0.681818	23	0.00348532
FAM178B	15	0.681818	21	0.00147564
FASTKD2	15	0.681818	23	0.00348532
FBXO25	15	0.681818	20	0.000923236
FER1L5	15	0.681818	21	0.00147564
FERMT3	15	0.681818	24	0.00517012
FHL2	15	0.681818	21	0.00147564
FIBP	15	0.681818	25	0.00750716
FKBP7	15	0.681818	23	0.00348532
FMNL2	15	0.681818	22	0.00229613
FOSL1	15	0.681818	25	0.00750716
FOXD4L1	15	0.681818	20	0.000923236
FRMD8	15	0.681818	24	0.00517012
FTH1	15	0.681818	25	0.00750716
FZD5	15	0.681818	23	0.00348532
GAD1	15	0.681818	22	0.00229613
GAL	15	0.681818	22	0.00229613
GAL3ST3	15	0.681818	25	0.00750716
GALNT13	15	0.681818	22	0.00229613
GALNT5	15	0.681818	22	0.00229613
GCC2	15	0.681818	21	0.00147564
GLI2	15	0.681818	20	0.000923236
GLS	15	0.681818	24	0.00517012
GLYAT	15	0.681818	24	0.00517012
GLYATL2	15	0.681818	21	0.00147564
GORASP2	15	0.681818	22	0.00229613
GOT1L1	15	0.681818	25	0.00750716
GPAT2	15	0.681818	17	0.000187921
GPD2	15	0.681818	22	0.00229613
GPR1	15	0.681818	23	0.00348532
GPR155	15	0.681818	23	0.00348532
GPR45	15	0.681818	21	0.00147564
GSTP1	15	0.681818	25	0.00750716
GTDC1	15	0.681818	21	0.00147564
GTF3C3	15	0.681818	23	0.00348532
HAT1	15	0.681818	22	0.00229613
HECW2	15	0.681818	23	0.00348532
HIBCH	15	0.681818	23	0.00348532
HNMT	15	0.681818	21	0.00147564
HNRNPA3	15	0.681818	23	0.00348532
HOXD1	15	0.681818	23	0.00348532
HOXD10	15	0.681818	23	0.00348532
HOXD11	15	0.681818	23	0.00348532
HOXD12	15	0.681818	23	0.00348532
HOXD13	15	0.681818	23	0.00348532
HOXD3	15	0.681818	23	0.00348532
HOXD4	15	0.681818	23	0.00348532
HOXD8	15	0.681818	23	0.00348532
HOXD9	15	0.681818	23	0.00348532
HSPD1	15	0.681818	23	0.00348532
ICA1L	15	0.681818	23	0.00348532
ICOS	15	0.681818	23	0.00348532
IDH1	15	0.681818	23	0.00348532
IGHMBP2	15	0.681818	22	0.00229613
IL18R1	15	0.681818	21	0.00147564
IL18RAP	15	0.681818	21	0.00147564
IL1A	15	0.681818	20	0.000923236
IL1B	15	0.681818	20	0.000923236
IL1F10	15	0.681818	20	0.000923236
IL1R1	15	0.681818	21	0.00147564
IL1R2	15	0.681818	21	0.00147564
IL1RL1	15	0.681818	21	0.00147564
IL1RL2	15	0.681818	21	0.00147564
IL1RN	15	0.681818	20	0.000923236
IL36A	15	0.681818	20	0.000923236
IL36B	15	0.681818	20	0.000923236
IL36G	15	0.681818	20	0.000923236
IL36RN	15	0.681818	20	0.000923236
IL37	15	0.681818	20	0.000923236
INCENP	15	0.681818	24	0.00517012
INHBB	15	0.681818	20	0.000923236
INO80D	15	0.681818	23	0.00348532
INPP1	15	0.681818	23	0.00348532
INPP4A	15	0.681818	21	0.00147564
ITGA6	15	0.681818	22	0.00229613
ITGB6	15	0.681818	22	0.00229613
KANSL1L	15	0.681818	23	0.00348532
KANSL3	15	0.681818	21	0.00147564
KAT5	15	0.681818	24	0.00517012
KBTBD11	15	0.681818	20	0.000923236
KCNIP3	15	0.681818	21	0.00147564
KCNJ3	15	0.681818	22	0.00229613
KCNK7	15	0.681818	25	0.00750716
KCNU1	15	0.681818	23	0.00348532
KDM2A	15	0.681818	22	0.00229613
KIF13B	15	0.681818	21	0.00147564
KIF5C	15	0.681818	21	0.00147564
KLC2	15	0.681818	22	0.00229613
KLF7	15	0.681818	23	0.00348532
KYNU	15	0.681818	21	0.00147564
LANCL1	15	0.681818	23	0.00348532
LCT	15	0.681818	20	0.000923236
LIMS1	15	0.681818	21	0.00147564
LIPT1	15	0.681818	21	0.00147564
LMAN2L	15	0.681818	21	0.00147564
LONRF2	15	0.681818	21	0.00147564
LPXN	15	0.681818	21	0.00147564
LRP1B	15	0.681818	21	0.00147564
LRP5	15	0.681818	25	0.00750716
LTBP3	15	0.681818	24	0.00517012
LYG1	15	0.681818	21	0.00147564
LYG2	15	0.681818	21	0.00147564
LYPD6	15	0.681818	21	0.00147564
LYPD6B	15	0.681818	21	0.00147564
MAL	15	0.681818	21	0.00147564
MAP2	15	0.681818	23	0.00348532
MAP3K11	15	0.681818	25	0.00750716
MAP4K4	15	0.681818	21	0.00147564
MARCO	15	0.681818	20	0.000923236
MBD5	15	0.681818	21	0.00147564
MCM6	15	0.681818	20	0.000923236
MDH1B	15	0.681818	23	0.00348532
METAP1D	15	0.681818	22	0.00229613
METTL21A	15	0.681818	23	0.00348532
METTL5	15	0.681818	22	0.00229613
METTL8	15	0.681818	22	0.00229613
MFSD6	15	0.681818	23	0.00348532
MFSD9	15	0.681818	21	0.00147564
MGAT4A	15	0.681818	21	0.00147564
MITD1	15	0.681818	21	0.00147564
MMADHC	15	0.681818	21	0.00147564
MPEG1	15	0.681818	21	0.00147564
MRPL11	15	0.681818	22	0.00229613
MRPL16	15	0.681818	24	0.00517012
MRPL21	15	0.681818	22	0.00229613
MRPL30	15	0.681818	21	0.00147564
MRPS5	15	0.681818	21	0.00147564
MRPS9	15	0.681818	21	0.00147564
MS4A1	15	0.681818	24	0.00517012
MS4A10	15	0.681818	21	0.00147564
MS4A12	15	0.681818	20	0.000923236
MS4A13	15	0.681818	23	0.00348532
MS4A14	15	0.681818	23	0.00348532
MS4A15	15	0.681818	21	0.00147564
MS4A2	15	0.681818	21	0.00147564
MS4A3	15	0.681818	21	0.00147564
MS4A4A	15	0.681818	21	0.00147564
MS4A5	15	0.681818	23	0.00348532
MS4A6A	15	0.681818	21	0.00147564
MS4A6E	15	0.681818	24	0.00517012
MS4A7	15	0.681818	24	0.00517012
MS4A8	15	0.681818	21	0.00147564
MSTN	15	0.681818	21	0.00147564
MTX2	15	0.681818	23	0.00348532
MUS81	15	0.681818	25	0.00750716
MYL1	15	0.681818	23	0.00348532
MYO1B	15	0.681818	22	0.00229613
MYO3B	15	0.681818	22	0.00229613
MYOM2	15	0.681818	20	0.000923236
NAB1	15	0.681818	23	0.00348532
NABP1	15	0.681818	22	0.00229613
NBEAL1	15	0.681818	23	0.00348532
NCK2	15	0.681818	21	0.00147564
NDUFS1	15	0.681818	23	0.00348532
NDUFS8	15	0.681818	25	0.00750716
NDUFV1	15	0.681818	25	0.00750716
NEB	15	0.681818	21	0.00147564
NEURL3	15	0.681818	21	0.00147564
NFE2L2	15	0.681818	23	0.00348532
NIFK	15	0.681818	20	0.000923236
NMI	15	0.681818	21	0.00147564
NMS	15	0.681818	21	0.00147564
NPAS2	15	0.681818	21	0.00147564
NPAS4	15	0.681818	24	0.00517012
NR4A2	15	0.681818	22	0.00229613
NRP2	15	0.681818	24	0.00517012
NRXN2	15	0.681818	25	0.00750716
NUDT8	15	0.681818	25	0.00750716
NXPH2	15	0.681818	21	0.00147564
OLA1	15	0.681818	23	0.00348532
OOSP2	15	0.681818	20	0.000923236
OR10Q1	15	0.681818	24	0.00517012
OR10V1	15	0.681818	24	0.00517012
OR10W1	15	0.681818	24	0.00517012
OR1S2	15	0.681818	24	0.00517012
OR4C6	15	0.681818	21	0.00147564
OR4D10	15	0.681818	24	0.00517012
OR4D11	15	0.681818	24	0.00517012
OR4D6	15	0.681818	24	0.00517012
OR4D9	15	0.681818	24	0.00517012
OR5A1	15	0.681818	24	0.00517012
OR5A2	15	0.681818	25	0.00750716
OR5AN1	15	0.681818	23	0.00348532
OR5B12	15	0.681818	21	0.00147564
OR5B17	15	0.681818	21	0.00147564
OR5B2	15	0.681818	20	0.000923236
OR5B21	15	0.681818	21	0.00147564
OR5B3	15	0.681818	20	0.000923236
OR9Q1	15	0.681818	23	0.00348532
OR9Q2	15	0.681818	24	0.00517012
ORC4	15	0.681818	21	0.00147564
ORMDL1	15	0.681818	23	0.00348532
OSBP	15	0.681818	23	0.00348532
OSBPL6	15	0.681818	23	0.00348532
OSGEPL1	15	0.681818	23	0.00348532
OVOL1	15	0.681818	24	0.00517012
PACS1	15	0.681818	24	0.00517012
PARD3B	15	0.681818	23	0.00348532
PATL1	15	0.681818	23	0.00348532
PAX8	15	0.681818	20	0.000923236
PC	15	0.681818	25	0.00750716
PDCL3	15	0.681818	21	0.00147564
PDE11A	15	0.681818	23	0.00348532
PDK1	15	0.681818	22	0.00229613
PELI3	15	0.681818	22	0.00229613
PGAP1	15	0.681818	23	0.00348532
PIKFYVE	15	0.681818	23	0.00348532
PITPNM1	15	0.681818	25	0.00750716
PKP4	15	0.681818	22	0.00229613
PLA2R1	15	0.681818	22	0.00229613
PLEKHM3	15	0.681818	23	0.00348532
PMS1	15	0.681818	23	0.00348532
POLA2	15	0.681818	24	0.00517012
POLR1B	15	0.681818	20	0.000923236
POU3F3	15	0.681818	21	0.00147564
PPIG	15	0.681818	22	0.00229613
PPP1R32	15	0.681818	21	0.00147564
PPP6R3	15	0.681818	25	0.00750716
PRDX5	15	0.681818	25	0.00750716
PRKRA	15	0.681818	23	0.00348532
PROM2	15	0.681818	21	0.00147564
PRPF19	15	0.681818	24	0.00517012
PRPF40A	15	0.681818	22	0.00229613
PSD4	15	0.681818	20	0.000923236
PTGDR2	15	0.681818	24	0.00517012
PTH2R	15	0.681818	23	0.00348532
PTPN4	15	0.681818	20	0.000923236
R3HDM1	15	0.681818	20	0.000923236
RAB11FIP1	15	0.681818	25	0.00750716
RAB1B	15	0.681818	25	0.00750716
RAB3GAP1	15	0.681818	20	0.000923236
RAB3IL1	15	0.681818	25	0.00750716
RABL2A	15	0.681818	20	0.000923236
RALB	15	0.681818	20	0.000923236
RANBP2	15	0.681818	21	0.00147564
RAPGEF4	15	0.681818	22	0.00229613
RAPH1	15	0.681818	23	0.00348532
RBM43	15	0.681818	21	0.00147564
RBM45	15	0.681818	23	0.00348532
RBM4B	15	0.681818	22	0.00229613
RBMS1	15	0.681818	22	0.00229613
RCE1	15	0.681818	22	0.00229613
REG1A	15	0.681818	22	0.00229613
REG1B	15	0.681818	22	0.00229613
REG3A	15	0.681818	22	0.00229613
REG3G	15	0.681818	22	0.00229613
RELA	15	0.681818	21	0.00147564
REV1	15	0.681818	21	0.00147564
RFTN2	15	0.681818	23	0.00348532
RFX8	15	0.681818	21	0.00147564
RGPD3	15	0.681818	21	0.00147564
RGPD4	15	0.681818	21	0.00147564
RHOD	15	0.681818	22	0.00229613
RIF1	15	0.681818	21	0.00147564
RIN1	15	0.681818	25	0.00750716
RNASEH2C	15	0.681818	24	0.00517012
RND3	15	0.681818	21	0.00147564
RNF149	15	0.681818	21	0.00147564
RPE	15	0.681818	23	0.00348532
RPL31	15	0.681818	21	0.00147564
RPRM	15	0.681818	22	0.00229613
SART1	15	0.681818	24	0.00517012
SCGB1D1	15	0.681818	22	0.00229613
SCRN3	15	0.681818	23	0.00348532
SCTR	15	0.681818	20	0.000923236
SCYL1	15	0.681818	25	0.00750716
SEMA4C	15	0.681818	21	0.00147564
SF3B1	15	0.681818	23	0.00348532
SF3B2	15	0.681818	24	0.00517012
SH3RF3	15	0.681818	21	0.00147564
SIPA1	15	0.681818	21	0.00147564
SLC20A1	15	0.681818	20	0.000923236
SLC22A12	15	0.681818	22	0.00229613
SLC25A12	15	0.681818	22	0.00229613
SLC25A45	15	0.681818	25	0.00750716
SLC29A2	15	0.681818	25	0.00750716
SLC35F5	15	0.681818	20	0.000923236
SLC39A10	15	0.681818	23	0.00348532
SLC40A1	15	0.681818	23	0.00348532
SLC5A7	15	0.681818	21	0.00147564
SLC9A2	15	0.681818	21	0.00147564
SLC9A4	15	0.681818	21	0.00147564
SNX32	15	0.681818	25	0.00750716
SOWAHC	15	0.681818	21	0.00147564
SP9	15	0.681818	23	0.00348532
SPOPL	15	0.681818	21	0.00147564
SPTBN2	15	0.681818	22	0.00229613
SSB	15	0.681818	22	0.00229613
ST6GAL2	15	0.681818	21	0.00147564
STAM2	15	0.681818	22	0.00229613
STAR	15	0.681818	25	0.00750716
STAT1	15	0.681818	24	0.00517012
STAT4	15	0.681818	23	0.00348532
STK17B	15	0.681818	23	0.00348532
STX3	15	0.681818	24	0.00517012
SULT1C2	15	0.681818	21	0.00147564
SULT1C3	15	0.681818	21	0.00147564
SULT1C4	15	0.681818	21	0.00147564
SYT12	15	0.681818	22	0.00229613
TANC1	15	0.681818	22	0.00229613
TANK	15	0.681818	22	0.00229613
TBC1D8	15	0.681818	21	0.00147564
TBX10	15	0.681818	25	0.00750716
TCIRG1	15	0.681818	25	0.00750716
TCN1	15	0.681818	21	0.00147564
TDRP	15	0.681818	20	0.000923236
TFCP2L1	15	0.681818	20	0.000923236
TGFBRAP1	15	0.681818	21	0.00147564
THSD7B	15	0.681818	21	0.00147564
TIGD3	15	0.681818	24	0.00517012
TLK1	15	0.681818	22	0.00229613
TMEFF2	15	0.681818	22	0.00229613
TMEM131	15	0.681818	21	0.00147564
TMEM138	15	0.681818	22	0.00229613
TMEM151A	15	0.681818	25	0.00750716
TMEM177	15	0.681818	20	0.000923236
TMEM182	15	0.681818	21	0.00147564
TMEM185B	15	0.681818	20	0.000923236
TMEM216	15	0.681818	22	0.00229613
TMEM37	15	0.681818	20	0.000923236
TRIM43	15	0.681818	21	0.00147564
TRMT112	15	0.681818	25	0.00750716
TSGA10	15	0.681818	21	0.00147564
TSN	15	0.681818	20	0.000923236
TTC30A	15	0.681818	23	0.00348532
TTC30B	15	0.681818	23	0.00348532
TTL	15	0.681818	20	0.000923236
TXNDC9	15	0.681818	21	0.00147564
UBR3	15	0.681818	22	0.00229613
UBXN4	15	0.681818	20	0.000923236
UNC50	15	0.681818	21	0.00147564
UNC80	15	0.681818	23	0.00348532
UNC93B1	15	0.681818	25	0.00750716
UPP2	15	0.681818	22	0.00229613
UXS1	15	0.681818	21	0.00147564
VWA3B	15	0.681818	21	0.00147564
VWCE	15	0.681818	22	0.00229613
WDR12	15	0.681818	23	0.00348532
WDR75	15	0.681818	23	0.00348532
WDSUB1	15	0.681818	22	0.00229613
WIPF1	15	0.681818	23	0.00348532
YIF1A	15	0.681818	25	0.00750716
ZAP70	15	0.681818	21	0.00147564
ZC3H6	15	0.681818	20	0.000923236
ZC3H8	15	0.681818	20	0.000923236
ZDBF2	15	0.681818	23	0.00348532
ZDHHC24	15	0.681818	25	0.00750716
ZEB2	15	0.681818	21	0.00147564
ZNF2	15	0.681818	21	0.00147564
ZNF514	15	0.681818	21	0.00147564
ZNF596	15	0.681818	20	0.000923236
ZNF703	15	0.681818	25	0.00750716
ZP1	15	0.681818	24	0.00517012
ZRANB3	15	0.681818	20	0.000923236
ABCB11	14	0.636364	22	0.00741621
ACER3	14	0.636364	21	0.00498418
ACMSD	14	0.636364	20	0.00326519
ACOXL	14	0.636364	21	0.00498418
AGPAT5	14	0.636364	21	0.00498418
AMER3	14	0.636364	20	0.00326519
AMOTL1	14	0.636364	21	0.00498418
ANAPC1	14	0.636364	21	0.00498418
ANKRD42	14	0.636364	20	0.00326519
ANKRD49	14	0.636364	21	0.00498418
AQP11	14	0.636364	22	0.00741621
ARHGEF4	14	0.636364	20	0.00326519
ATAD2B	14	0.636364	22	0.00741621
ATOH8	14	0.636364	22	0.00741621
B3GNT6	14	0.636364	22	0.00741621
BBS5	14	0.636364	22	0.00741621
BCL2L11	14	0.636364	21	0.00498418
BIN1	14	0.636364	20	0.00326519
BUB1	14	0.636364	22	0.00741621
C11orf71	14	0.636364	21	0.00498418
C1QL2	14	0.636364	20	0.00326519
CAPG	14	0.636364	22	0.00741621
CCDC115	14	0.636364	20	0.00326519
CCDC25	14	0.636364	21	0.00498418
CCDC74A	14	0.636364	20	0.00326519
CCDC90B	14	0.636364	21	0.00498418
CCNT2	14	0.636364	20	0.00326519
CD8A	14	0.636364	22	0.00741621
CD8B	14	0.636364	22	0.00741621
CFC1	14	0.636364	20	0.00326519
CFC1B	14	0.636364	20	0.00326519
CLNS1A	14	0.636364	22	0.00741621
CLU	14	0.636364	21	0.00498418
CSMD1	14	0.636364	20	0.00326519
CTSC	14	0.636364	20	0.00326519
CWC15	14	0.636364	20	0.00326519
CYP27C1	14	0.636364	20	0.00326519
DCTN6	14	0.636364	21	0.00498418
DEFA4	14	0.636364	20	0.00326519
DEFA5	14	0.636364	20	0.00326519
DEFA6	14	0.636364	20	0.00326519
DEFB1	14	0.636364	20	0.00326519
DEFB4B	14	0.636364	22	0.00741621
DHRS9	14	0.636364	22	0.00741621
DLG2	14	0.636364	21	0.00498418
DNAH6	14	0.636364	22	0.00741621
DPP4	14	0.636364	22	0.00741621
DUSP4	14	0.636364	21	0.00498418
EIF2AK3	14	0.636364	22	0.00741621
ELMOD3	14	0.636364	22	0.00741621
ELP3	14	0.636364	21	0.00498418
ENDOD1	14	0.636364	21	0.00498418
EPHX2	14	0.636364	21	0.00498418
ESCO2	14	0.636364	21	0.00498418
EXTL3	14	0.636364	21	0.00498418
FABP1	14	0.636364	22	0.00741621
FAM168B	14	0.636364	20	0.00326519
FAM181B	14	0.636364	22	0.00741621
FAP	14	0.636364	22	0.00741621
FASTKD1	14	0.636364	22	0.00741621
FBLN7	14	0.636364	21	0.00498418
FBXO16	14	0.636364	21	0.00498418
FIGN	14	0.636364	22	0.00741621
FOXI3	14	0.636364	22	0.00741621
FUT4	14	0.636364	21	0.00498418
FZD3	14	0.636364	21	0.00498418
FZD4	14	0.636364	22	0.00741621
G6PC2	14	0.636364	22	0.00741621
GCA	14	0.636364	22	0.00741621
GDPD4	14	0.636364	22	0.00741621
GGCX	14	0.636364	22	0.00741621
GNLY	14	0.636364	22	0.00741621
GPR148	14	0.636364	20	0.00326519
GPR83	14	0.636364	20	0.00326519
GRB14	14	0.636364	22	0.00741621
GRM5	14	0.636364	20	0.00326519
GSR	14	0.636364	21	0.00498418
GTF2E2	14	0.636364	21	0.00498418
HMBOX1	14	0.636364	21	0.00498418
IFIH1	14	0.636364	22	0.00741621
IMMT	14	0.636364	22	0.00741621
IMP4	14	0.636364	20	0.00326519
INSIG2	14	0.636364	20	0.00326519
INTS9	14	0.636364	21	0.00498418
KCMF1	14	0.636364	22	0.00741621
KCNH7	14	0.636364	22	0.00741621
KDM3A	14	0.636364	22	0.00741621
KDM4D	14	0.636364	21	0.00498418
KDM4E	14	0.636364	21	0.00498418
KLHL29	14	0.636364	22	0.00741621
KLHL41	14	0.636364	22	0.00741621
KRCC1	14	0.636364	22	0.00741621
LEPROTL1	14	0.636364	21	0.00498418
LRP2	14	0.636364	22	0.00741621
LRRTM4	14	0.636364	22	0.00741621
MALL	14	0.636364	21	0.00498418
MAP3K19	14	0.636364	20	0.00326519
MAT2A	14	0.636364	22	0.00741621
MBOAT4	14	0.636364	21	0.00498418
MCPH1	14	0.636364	21	0.00498418
MERTK	14	0.636364	21	0.00498418
MGAT5	14	0.636364	20	0.00326519
MRPL35	14	0.636364	22	0.00741621
MYO7A	14	0.636364	22	0.00741621
MZT2A	14	0.636364	20	0.00326519
MZT2B	14	0.636364	20	0.00326519
NNMT	14	0.636364	20	0.00326519
NOX4	14	0.636364	20	0.00326519
NPHP1	14	0.636364	21	0.00498418
NUGGC	14	0.636364	21	0.00498418
OR4A5	14	0.636364	20	0.00326519
OR4C46	14	0.636364	19	0.00208052
OR4F21	14	0.636364	19	0.00208052
PBK	14	0.636364	21	0.00498418
PCF11	14	0.636364	20	0.00326519
PLEKHB2	14	0.636364	20	0.00326519
PNOC	14	0.636364	21	0.00498418
POLR1A	14	0.636364	22	0.00741621
POTEE	14	0.636364	20	0.00326519
POTEF	14	0.636364	20	0.00326519
POTEI	14	0.636364	20	0.00326519
POTEJ	14	0.636364	20	0.00326519
PPP2CB	14	0.636364	21	0.00498418
PRCP	14	0.636364	21	0.00498418
PRSS23	14	0.636364	21	0.00498418
PSMD14	14	0.636364	22	0.00741621
PTCD3	14	0.636364	22	0.00741621
PTPN18	14	0.636364	20	0.00326519
PURG	14	0.636364	21	0.00498418
RAB30	14	0.636364	22	0.00741621
RAB38	14	0.636364	20	0.00326519
RAB6C	14	0.636364	20	0.00326519
RBM7	14	0.636364	21	0.00498418
RBPMS	14	0.636364	20	0.00326519
REEP1	14	0.636364	22	0.00741621
RETSAT	14	0.636364	22	0.00741621
RMND5A	14	0.636364	22	0.00741621
RNF181	14	0.636364	22	0.00741621
RPIA	14	0.636364	22	0.00741621
SCARA3	14	0.636364	21	0.00498418
SCARA5	14	0.636364	21	0.00498418
SCN2A	14	0.636364	22	0.00741621
SCN3A	14	0.636364	22	0.00741621
SESN3	14	0.636364	20	0.00326519
SFTPB	14	0.636364	22	0.00741621
SLC38A11	14	0.636364	22	0.00741621
SLC4A10	14	0.636364	22	0.00741621
SMPD4	14	0.636364	20	0.00326519
SMYD1	14	0.636364	22	0.00741621
SMYD5	14	0.636364	22	0.00741621
SRSF8	14	0.636364	21	0.00498418
ST3GAL5	14	0.636364	22	0.00741621
STARD10	14	0.636364	22	0.00741621
STEAP3	14	0.636364	20	0.00326519
SUCLG1	14	0.636364	22	0.00741621
TBR1	14	0.636364	22	0.00741621
TCF7L1	14	0.636364	22	0.00741621
TEX15	14	0.636364	21	0.00498418
TEX37	14	0.636364	22	0.00741621
TGOLN2	14	0.636364	22	0.00741621
THNSL2	14	0.636364	22	0.00741621
TMEM135	14	0.636364	21	0.00498418
TMEM150A	14	0.636364	22	0.00741621
TMEM163	14	0.636364	20	0.00326519
TMEM87B	14	0.636364	21	0.00498418
TMSB10	14	0.636364	22	0.00741621
TRABD2A	14	0.636364	22	0.00741621
TRIM49	14	0.636364	18	0.00128621
TRIM64	14	0.636364	15	0.000246017
TRIM64B	14	0.636364	19	0.00208052
TRIM77	14	0.636364	19	0.00208052
TSKU	14	0.636364	21	0.00498418
TUBA3D	14	0.636364	20	0.00326519
TUBA3E	14	0.636364	20	0.00326519
TYR	14	0.636364	20	0.00326519
UBXN8	14	0.636364	21	0.00498418
UNC5D	14	0.636364	22	0.00741621
USP39	14	0.636364	22	0.00741621
VAMP5	14	0.636364	22	0.00741621
VAMP8	14	0.636364	22	0.00741621
WNT11	14	0.636364	22	0.00741621
WRN	14	0.636364	21	0.00498418
XKR5	14	0.636364	20	0.00326519
ZNF395	14	0.636364	21	0.00498418
ZNF705G	14	0.636364	21	0.00498418
C1QTNF4	13	0.590909	18	0.00445997
CELF1	13	0.590909	19	0.00686433
CLMP	13	0.590909	19	0.00686433
FNBP4	13	0.590909	19	0.00686433
GRAMD1B	13	0.590909	19	0.00686433
KBTBD4	13	0.590909	19	0.00686433
LONRF1	13	0.590909	19	0.00686433
NDUFS3	13	0.590909	19	0.00686433
NUP160	13	0.590909	18	0.00445997
OR4A47	13	0.590909	18	0.00445997
PTPMT1	13	0.590909	19	0.00686433
ZC3H12C	13	0.590909	19	0.00686433
ZNF705D	13	0.590909	19	0.00686433
ABCC8	12	0.545455	16	0.00586305
CCDC179	12	0.545455	17	0.00913029
FIBIN	12	0.545455	17	0.00913029
GTF2H1	12	0.545455	17	0.00913029
KCNJ11	12	0.545455	16	0.00586305
KIF18A	12	0.545455	17	0.00913029
METTL15	12	0.545455	17	0.00913029
NCR3LG1	12	0.545455	16	0.00586305
OR4C3	12	0.545455	17	0.00913029
OR4C45	12	0.545455	17	0.00913029
OR4F4	12	0.545455	16	0.00586305
OR4S1	12	0.545455	17	0.00913029
OR4X1	12	0.545455	17	0.00913029
OTOG	12	0.545455	17	0.00913029
PTPN5	12	0.545455	16	0.00586305
SERGEF	12	0.545455	17	0.00913029
TRIM49B	12	0.545455	17	0.00913029
USH1C	12	0.545455	17	0.00913029
ASPG	7	0.318182	51	0.00517012
C14orf180	7	0.318182	50	0.00750716
CRIP1	7	0.318182	51	0.00517012
CRIP2	7	0.318182	51	0.00517012
INF2	7	0.318182	50	0.00750716
KIF26A	7	0.318182	50	0.00750716
TDRD9	7	0.318182	51	0.00517012
TMEM121	7	0.318182	51	0.00517012
TMEM179	7	0.318182	50	0.00750716
AHNAK2	6	0.272727	50	0.00233733
AKT1	6	0.272727	50	0.00233733
BRF1	6	0.272727	51	0.00154543
CDCA4	6	0.272727	50	0.00233733
CEP170B	6	0.272727	50	0.00233733
GPR132	6	0.272727	50	0.00233733
JAG2	6	0.272727	51	0.00154543
MTA1	6	0.272727	51	0.00154543
NUDT14	6	0.272727	51	0.00154543
PACS2	6	0.272727	51	0.00154543
PLD4	6	0.272727	50	0.00233733
SIVA1	6	0.272727	50	0.00233733
TEX22	6	0.272727	51	0.00154543
ZBTB42	6	0.272727	50	0.00233733
BTG3	5	0.227273	43	0.00899535
C21orf58	5	0.227273	44	0.00648451
C21orf91	5	0.227273	43	0.00899535
CHODL	5	0.227273	43	0.00899535
COL6A1	5	0.227273	45	0.00460538
COL6A2	5	0.227273	45	0.00460538
CRYZL1	5	0.227273	43	0.00899535
CXADR	5	0.227273	43	0.00899535
DIP2A	5	0.227273	44	0.00648451
DNAJC28	5	0.227273	43	0.00899535
DONSON	5	0.227273	43	0.00899535
FTCD	5	0.227273	44	0.00648451
GART	5	0.227273	43	0.00899535
IFNAR1	5	0.227273	43	0.00899535
IFNAR2	5	0.227273	43	0.00899535
IFNGR2	5	0.227273	43	0.00899535
IL10RB	5	0.227273	43	0.00899535
LSS	5	0.227273	44	0.00648451
MCM3AP	5	0.227273	44	0.00648451
NCAM2	5	0.227273	43	0.00899535
OLIG1	5	0.227273	43	0.00899535
OLIG2	5	0.227273	43	0.00899535
PAXBP1	5	0.227273	43	0.00899535
PCBP3	5	0.227273	43	0.00899535
PCNT	5	0.227273	44	0.00648451
POFUT2	5	0.227273	43	0.00899535
PRMT2	5	0.227273	44	0.00648451
S100B	5	0.227273	44	0.00648451
SLC19A1	5	0.227273	43	0.00899535
SON	5	0.227273	43	0.00899535
SPATC1L	5	0.227273	44	0.00648451
SYNJ1	5	0.227273	43	0.00899535
TMEM50B	5	0.227273	43	0.00899535
TMPRSS15	5	0.227273	43	0.00899535
YBEY	5	0.227273	44	0.00648451

## Sheet: CNV_Classic_freq>20%,p<0.01
gene	classic	freq	other	prop2_pvalue
AAR2	17	0.320755	27	0.00736844
ACSS2	17	0.320755	28	0.00374848
AHCY	17	0.320755	28	0.00374848
ASIP	17	0.320755	28	0.00374848
BLCAP	17	0.320755	27	0.00736844
C20orf173	17	0.320755	27	0.00736844
CEP250	17	0.320755	28	0.00374848
CHMP4B	17	0.320755	29	0.00182054
CNBD2	17	0.320755	28	0.00374848
CPNE1	17	0.320755	27	0.00736844
DLGAP4	17	0.320755	27	0.00736844
DSN1	17	0.320755	28	0.00374848
DYNLRB1	17	0.320755	28	0.00374848
E2F1	17	0.320755	29	0.00182054
EIF2S2	17	0.320755	28	0.00374848
EIF6	17	0.320755	28	0.00374848
EPB41L1	17	0.320755	27	0.00736844
ERGIC3	17	0.320755	27	0.00736844
FAM83C	17	0.320755	28	0.00374848
GDF5	17	0.320755	28	0.00374848
GGT7	17	0.320755	28	0.00374848
GHRH	17	0.320755	27	0.00736844
GSS	17	0.320755	28	0.00374848
ITCH	17	0.320755	28	0.00374848
MANBAL	17	0.320755	27	0.00736844
MAP1LC3A	17	0.320755	28	0.00374848
MYH7B	17	0.320755	28	0.00374848
NCOA6	17	0.320755	28	0.00374848
NDRG3	17	0.320755	28	0.00374848
NECAB3	17	0.320755	29	0.00182054
NFS1	17	0.320755	27	0.00736844
PHF20	17	0.320755	27	0.00736844
PIGU	17	0.320755	28	0.00374848
PXMP4	17	0.320755	29	0.00182054
RALY	17	0.320755	28	0.00374848
RBL1	17	0.320755	27	0.00736844
RBM39	17	0.320755	27	0.00736844
ROMO1	17	0.320755	27	0.00736844
RPN2	17	0.320755	27	0.00736844
SAMHD1	17	0.320755	27	0.00736844
SCAND1	17	0.320755	28	0.00374848
SLA2	17	0.320755	28	0.00374848
SOGA1	17	0.320755	28	0.00374848
SPAG4	17	0.320755	27	0.00736844
SRC	17	0.320755	27	0.00736844
TLDC2	17	0.320755	27	0.00736844
TP53INP2	17	0.320755	28	0.00374848
TRPC4AP	17	0.320755	29	0.00182054
UQCC1	17	0.320755	28	0.00374848
ZNF341	17	0.320755	29	0.00182054
ACTR5	16	0.301887	27	0.00408259
ADIG	16	0.301887	27	0.00408259
CHD6	16	0.301887	27	0.00408259
CTNNBL1	16	0.301887	27	0.00408259
DHX35	16	0.301887	27	0.00408259
EMILIN3	16	0.301887	27	0.00408259
FAM83D	16	0.301887	27	0.00408259
LPIN3	16	0.301887	27	0.00408259
MAFB	16	0.301887	27	0.00408259
PLCG1	16	0.301887	27	0.00408259
PPP1R16B	16	0.301887	27	0.00408259
SLC32A1	16	0.301887	27	0.00408259
TOP1	16	0.301887	27	0.00408259
ZHX3	16	0.301887	27	0.00408259
CBWD5	15	0.283019	26	0.00437721
FOXD4L4	15	0.283019	26	0.00437721
SPATA31A6	15	0.283019	26	0.00437721
CBWD3	14	0.264151	25	0.00462061
CBWD6	14	0.264151	24	0.00887904
CCT4	14	0.264151	24	0.00887904
FAM161A	14	0.264151	24	0.00887904
FOXD4L3	14	0.264151	25	0.00462061
FOXD4L6	14	0.264151	25	0.00462061
GALNT3	14	0.264151	24	0.00887904
GLS	14	0.264151	25	0.00462061
NRP2	14	0.264151	25	0.00462061
SCN1A	14	0.264151	24	0.00887904
STAT1	14	0.264151	25	0.00462061
TTC21B	14	0.264151	24	0.00887904
AAK1	13	0.245283	24	0.00480135
AAMP	13	0.245283	23	0.00919356
ABCA12	13	0.245283	24	0.00480135
ABCB11	13	0.245283	23	0.00919356
ABCB6	13	0.245283	23	0.00919356
ABHD1	13	0.245283	24	0.00480135
ABI2	13	0.245283	25	0.00240948
ACADL	13	0.245283	25	0.00240948
ACSL3	13	0.245283	23	0.00919356
ACTG2	13	0.245283	24	0.00480135
ACTR2	13	0.245283	23	0.00919356
ACYP2	13	0.245283	23	0.00919356
ADAM23	13	0.245283	25	0.00240948
ADCY3	13	0.245283	23	0.00919356
ADD2	13	0.245283	24	0.00480135
AFTPH	13	0.245283	23	0.00919356
AGBL5	13	0.245283	24	0.00480135
AGFG1	13	0.245283	23	0.00919356
AGPS	13	0.245283	25	0.00240948
AGTPBP1	13	0.245283	23	0.00919356
ALG2	13	0.245283	24	0.00480135
ALK	13	0.245283	24	0.00480135
ALMS1	13	0.245283	24	0.00480135
ALS2	13	0.245283	24	0.00480135
ANKAR	13	0.245283	25	0.00240948
ANKRD44	13	0.245283	25	0.00240948
ANKRD53	13	0.245283	24	0.00480135
ANKS6	13	0.245283	23	0.00919356
ANKZF1	13	0.245283	23	0.00919356
ANP32B	13	0.245283	23	0.00919356
ANTXR1	13	0.245283	24	0.00480135
ANXA4	13	0.245283	24	0.00480135
AOX1	13	0.245283	24	0.00480135
AP1S3	13	0.245283	23	0.00919356
APLF	13	0.245283	24	0.00480135
ARHGAP25	13	0.245283	24	0.00480135
ARHGEF33	13	0.245283	23	0.00919356
ARPC2	13	0.245283	23	0.00919356
ASIC4	13	0.245283	23	0.00919356
ASNSD1	13	0.245283	25	0.00240948
ASPRV1	13	0.245283	24	0.00480135
ATF2	13	0.245283	25	0.00240948
ATG9A	13	0.245283	23	0.00919356
ATIC	13	0.245283	24	0.00480135
ATL2	13	0.245283	23	0.00919356
ATP6V1B1	13	0.245283	24	0.00480135
ATRAID	13	0.245283	24	0.00480135
AUH	13	0.245283	23	0.00919356
AUP1	13	0.245283	24	0.00480135
B3GNT2	13	0.245283	24	0.00480135
BAAT	13	0.245283	24	0.00480135
BARD1	13	0.245283	24	0.00480135
BARX1	13	0.245283	23	0.00919356
BBS5	13	0.245283	23	0.00919356
BCL11A	13	0.245283	24	0.00480135
BCS1L	13	0.245283	23	0.00919356
BICD2	13	0.245283	23	0.00919356
BIRC6	13	0.245283	23	0.00919356
BMP10	13	0.245283	24	0.00480135
BMPR2	13	0.245283	25	0.00240948
BOLA3	13	0.245283	24	0.00480135
BOLL	13	0.245283	24	0.00480135
BZW1	13	0.245283	24	0.00480135
C1D	13	0.245283	24	0.00480135
C2orf16	13	0.245283	24	0.00480135
C2orf42	13	0.245283	24	0.00480135
C2orf66	13	0.245283	25	0.00240948
C2orf69	13	0.245283	24	0.00480135
C2orf73	13	0.245283	23	0.00919356
C2orf74	13	0.245283	24	0.00480135
C2orf78	13	0.245283	24	0.00480135
C2orf80	13	0.245283	25	0.00240948
C2orf81	13	0.245283	24	0.00480135
C2orf83	13	0.245283	23	0.00919356
C2orf88	13	0.245283	25	0.00240948
C2orf91	13	0.245283	23	0.00919356
C9orf129	13	0.245283	23	0.00919356
C9orf153	13	0.245283	23	0.00919356
C9orf47	13	0.245283	23	0.00919356
CAD	13	0.245283	24	0.00480135
CALCRL	13	0.245283	23	0.00919356
CAPN13	13	0.245283	24	0.00480135
CAPN14	13	0.245283	24	0.00480135
CARF	13	0.245283	25	0.00240948
CASP10	13	0.245283	24	0.00480135
CASP8	13	0.245283	24	0.00480135
CCDC121	13	0.245283	24	0.00480135
CCDC140	13	0.245283	23	0.00919356
CCDC141	13	0.245283	24	0.00480135
CCDC142	13	0.245283	24	0.00480135
CCDC150	13	0.245283	25	0.00240948
CCDC173	13	0.245283	24	0.00480135
CCDC85A	13	0.245283	23	0.00919356
CCL20	13	0.245283	23	0.00919356
CCNYL1	13	0.245283	25	0.00240948
CCT7	13	0.245283	24	0.00480135
CD207	13	0.245283	24	0.00480135
CD28	13	0.245283	25	0.00240948
CDC14B	13	0.245283	23	0.00919356
CDC42EP3	13	0.245283	23	0.00919356
CDCA7	13	0.245283	24	0.00480135
CDK15	13	0.245283	24	0.00480135
CDK20	13	0.245283	23	0.00919356
CDK5R2	13	0.245283	23	0.00919356
CDKL4	13	0.245283	23	0.00919356
CEBPZ	13	0.245283	23	0.00919356
CENPA	13	0.245283	23	0.00919356
CENPP	13	0.245283	23	0.00919356
CEP68	13	0.245283	23	0.00919356
CERKL	13	0.245283	23	0.00919356
CERS6	13	0.245283	24	0.00480135
CFLAR	13	0.245283	24	0.00480135
CGREF1	13	0.245283	24	0.00480135
CHN1	13	0.245283	25	0.00240948
CHPF	13	0.245283	23	0.00919356
CHRNA1	13	0.245283	25	0.00240948
CIB4	13	0.245283	23	0.00919356
CIR1	13	0.245283	25	0.00240948
CKS2	13	0.245283	23	0.00919356
CLEC4F	13	0.245283	24	0.00480135
CLHC1	13	0.245283	23	0.00919356
CLIP4	13	0.245283	24	0.00480135
CLK1	13	0.245283	24	0.00480135
CNPPD1	13	0.245283	23	0.00919356
CNRIP1	13	0.245283	24	0.00480135
COBLL1	13	0.245283	24	0.00480135
COL3A1	13	0.245283	23	0.00919356
COL4A3	13	0.245283	23	0.00919356
COL4A4	13	0.245283	23	0.00919356
COL5A2	13	0.245283	23	0.00919356
COMMD1	13	0.245283	24	0.00480135
COQ10B	13	0.245283	25	0.00240948
CORO2A	13	0.245283	23	0.00919356
COX7A2L	13	0.245283	23	0.00919356
CPO	13	0.245283	25	0.00240948
CPS1	13	0.245283	25	0.00240948
CREB1	13	0.245283	25	0.00240948
CRIM1	13	0.245283	23	0.00919356
CRYBA2	13	0.245283	23	0.00919356
CRYGA	13	0.245283	25	0.00240948
CSRNP3	13	0.245283	24	0.00480135
CTDSP1	13	0.245283	23	0.00919356
CTLA4	13	0.245283	25	0.00240948
CTSL	13	0.245283	23	0.00919356
CTSV	13	0.245283	23	0.00919356
CWC22	13	0.245283	23	0.00919356
CXCR1	13	0.245283	23	0.00919356
CXCR2	13	0.245283	23	0.00919356
CYBRD1	13	0.245283	24	0.00480135
CYLC2	13	0.245283	24	0.00480135
CYP1B1	13	0.245283	23	0.00919356
CYP20A1	13	0.245283	25	0.00240948
CYP26B1	13	0.245283	23	0.00919356
CYP27A1	13	0.245283	23	0.00919356
DAPK1	13	0.245283	23	0.00919356
DAW1	13	0.245283	23	0.00919356
DCAF17	13	0.245283	24	0.00480135
DCTN1	13	0.245283	24	0.00480135
DES	13	0.245283	23	0.00919356
DGUOK	13	0.245283	24	0.00480135
DHRS9	13	0.245283	23	0.00919356
DHX57	13	0.245283	23	0.00919356
DIRAS2	13	0.245283	23	0.00919356
DIRC1	13	0.245283	23	0.00919356
DLX1	13	0.245283	24	0.00480135
DLX2	13	0.245283	24	0.00480135
DNAH7	13	0.245283	25	0.00240948
DNAJB2	13	0.245283	23	0.00919356
DNAJC10	13	0.245283	23	0.00919356
DNAJC27	13	0.245283	23	0.00919356
DNAJC5G	13	0.245283	24	0.00480135
DNMT3A	13	0.245283	23	0.00919356
DNPEP	13	0.245283	23	0.00919356
DOCK10	13	0.245283	23	0.00919356
DOK1	13	0.245283	24	0.00480135
DPY30	13	0.245283	24	0.00480135
DPYSL5	13	0.245283	24	0.00480135
DQX1	13	0.245283	24	0.00480135
DRC1	13	0.245283	23	0.00919356
DTNB	13	0.245283	23	0.00919356
DUSP11	13	0.245283	24	0.00480135
DUSP19	13	0.245283	23	0.00919356
DYSF	13	0.245283	23	0.00919356
DYTN	13	0.245283	25	0.00240948
EEF1B2	13	0.245283	25	0.00240948
EFEMP1	13	0.245283	23	0.00919356
EFR3B	13	0.245283	23	0.00919356
EGR4	13	0.245283	24	0.00480135
EHBP1	13	0.245283	24	0.00480135
EHD3	13	0.245283	24	0.00480135
EIF2AK2	13	0.245283	23	0.00919356
EIF2B4	13	0.245283	24	0.00480135
EMILIN1	13	0.245283	24	0.00480135
EML4	13	0.245283	23	0.00919356
EML6	13	0.245283	23	0.00919356
EMX1	13	0.245283	24	0.00480135
EPHA4	13	0.245283	23	0.00919356
ERBB4	13	0.245283	25	0.00240948
ERCC6L2	13	0.245283	23	0.00919356
ERICH2	13	0.245283	24	0.00480135
ERP44	13	0.245283	24	0.00480135
EVA1A	13	0.245283	24	0.00480135
EVX2	13	0.245283	25	0.00240948
EXOC6B	13	0.245283	24	0.00480135
FAM117B	13	0.245283	25	0.00240948
FAM120A	13	0.245283	23	0.00919356
FAM120AOS	13	0.245283	23	0.00919356
FAM126B	13	0.245283	24	0.00480135
FAM136A	13	0.245283	24	0.00480135
FAM171B	13	0.245283	23	0.00919356
FAM228A	13	0.245283	23	0.00919356
FAM228B	13	0.245283	23	0.00919356
FAM98A	13	0.245283	23	0.00919356
FANCC	13	0.245283	23	0.00919356
FANCL	13	0.245283	23	0.00919356
FARSB	13	0.245283	23	0.00919356
FASTKD1	13	0.245283	23	0.00919356
FASTKD2	13	0.245283	25	0.00240948
FBP1	13	0.245283	23	0.00919356
FBP2	13	0.245283	23	0.00919356
FBXO41	13	0.245283	24	0.00480135
FBXO48	13	0.245283	24	0.00480135
FEV	13	0.245283	23	0.00919356
FEZ2	13	0.245283	23	0.00919356
FGD3	13	0.245283	23	0.00919356
FIGLA	13	0.245283	24	0.00480135
FKBP1B	13	0.245283	23	0.00919356
FKBP7	13	0.245283	25	0.00240948
FN1	13	0.245283	24	0.00480135
FNDC4	13	0.245283	24	0.00480135
FOSL2	13	0.245283	24	0.00480135
FOXE1	13	0.245283	23	0.00919356
FRZB	13	0.245283	23	0.00919356
FSIP2	13	0.245283	23	0.00919356
FZD5	13	0.245283	25	0.00240948
FZD7	13	0.245283	24	0.00480135
G6PC2	13	0.245283	23	0.00919356
GABBR2	13	0.245283	23	0.00919356
GAD1	13	0.245283	24	0.00480135
GADD45G	13	0.245283	23	0.00919356
GALNT12	13	0.245283	23	0.00919356
GALNT14	13	0.245283	24	0.00480135
GAS1	13	0.245283	23	0.00919356
GCFC2	13	0.245283	24	0.00480135
GCKR	13	0.245283	24	0.00480135
GEMIN6	13	0.245283	23	0.00919356
GFPT1	13	0.245283	24	0.00480135
GKN1	13	0.245283	24	0.00480135
GKN2	13	0.245283	24	0.00480135
GLB1L	13	0.245283	23	0.00919356
GMCL1	13	0.245283	24	0.00480135
GMPPA	13	0.245283	23	0.00919356
GOLM1	13	0.245283	23	0.00919356
GORASP2	13	0.245283	24	0.00480135
GPATCH11	13	0.245283	23	0.00919356
GPBAR1	13	0.245283	23	0.00919356
GPN1	13	0.245283	24	0.00480135
GPR1	13	0.245283	25	0.00240948
GPR155	13	0.245283	25	0.00240948
GTF3C2	13	0.245283	24	0.00480135
GTF3C3	13	0.245283	25	0.00240948
GULP1	13	0.245283	23	0.00919356
HAAO	13	0.245283	23	0.00919356
HABP4	13	0.245283	23	0.00919356
HADHA	13	0.245283	23	0.00919356
HADHB	13	0.245283	23	0.00919356
HAT1	13	0.245283	24	0.00480135
HEATR5B	13	0.245283	23	0.00919356
HECW2	13	0.245283	25	0.00240948
HEMGN	13	0.245283	23	0.00919356
HIBCH	13	0.245283	25	0.00240948
HK2	13	0.245283	24	0.00480135
HNRNPA3	13	0.245283	25	0.00240948
HNRNPLL	13	0.245283	23	0.00919356
HOXD1	13	0.245283	25	0.00240948
HOXD10	13	0.245283	25	0.00240948
HOXD11	13	0.245283	25	0.00240948
HOXD12	13	0.245283	25	0.00240948
HOXD13	13	0.245283	25	0.00240948
HOXD3	13	0.245283	25	0.00240948
HOXD4	13	0.245283	25	0.00240948
HOXD8	13	0.245283	25	0.00240948
HOXD9	13	0.245283	25	0.00240948
HSD17B3	13	0.245283	23	0.00919356
HSPD1	13	0.245283	25	0.00240948
HTRA2	13	0.245283	24	0.00480135
ICA1L	13	0.245283	25	0.00240948
ICOS	13	0.245283	25	0.00240948
IDH1	13	0.245283	25	0.00240948
IFT172	13	0.245283	24	0.00480135
IHH	13	0.245283	23	0.00919356
IKZF2	13	0.245283	24	0.00480135
INHA	13	0.245283	23	0.00919356
INO80D	13	0.245283	25	0.00240948
INPP1	13	0.245283	25	0.00240948
INVS	13	0.245283	24	0.00480135
IPPK	13	0.245283	23	0.00919356
IRS1	13	0.245283	23	0.00919356
ISCA1	13	0.245283	23	0.00919356
ITGA4	13	0.245283	23	0.00919356
ITGA6	13	0.245283	24	0.00480135
ITGAV	13	0.245283	23	0.00919356
KANSL1L	13	0.245283	25	0.00240948
KCNE4	13	0.245283	23	0.00919356
KCNG3	13	0.245283	23	0.00919356
KCNK3	13	0.245283	23	0.00919356
KCTD18	13	0.245283	24	0.00480135
KHK	13	0.245283	24	0.00480135
KIAA1841	13	0.245283	24	0.00480135
KIF3C	13	0.245283	23	0.00919356
KLF7	13	0.245283	25	0.00240948
KLHL41	13	0.245283	23	0.00919356
KRTCAP3	13	0.245283	24	0.00480135
LANCL1	13	0.245283	25	0.00240948
LBH	13	0.245283	24	0.00480135
LBX2	13	0.245283	24	0.00480135
LCLAT1	13	0.245283	24	0.00480135
LGALSL	13	0.245283	23	0.00919356
LOXL3	13	0.245283	24	0.00480135
LRP2	13	0.245283	23	0.00919356
LTBP1	13	0.245283	23	0.00919356
M1AP	13	0.245283	24	0.00480135
MAP2	13	0.245283	25	0.00240948
MAP4K3	13	0.245283	23	0.00919356
MAPRE3	13	0.245283	24	0.00480135
MARS2	13	0.245283	24	0.00480135
MCEE	13	0.245283	24	0.00480135
MDH1	13	0.245283	24	0.00480135
MDH1B	13	0.245283	25	0.00240948
MEIS1	13	0.245283	23	0.00919356
MEMO1	13	0.245283	24	0.00480135
METAP1D	13	0.245283	24	0.00480135
METTL21A	13	0.245283	25	0.00240948
METTL5	13	0.245283	24	0.00480135
METTL8	13	0.245283	24	0.00480135
MFSD2B	13	0.245283	23	0.00919356
MFSD6	13	0.245283	25	0.00240948
MOB1A	13	0.245283	24	0.00480135
MOGAT1	13	0.245283	23	0.00919356
MOGS	13	0.245283	24	0.00480135
MORN2	13	0.245283	23	0.00919356
MPHOSPH10	13	0.245283	24	0.00480135
MPP4	13	0.245283	24	0.00480135
MPV17	13	0.245283	24	0.00480135
MREG	13	0.245283	24	0.00480135
MRPL19	13	0.245283	24	0.00480135
MRPL33	13	0.245283	24	0.00480135
MRPL50	13	0.245283	24	0.00480135
MRPL53	13	0.245283	24	0.00480135
MTA3	13	0.245283	23	0.00919356
MTHFD2	13	0.245283	24	0.00480135
MTIF2	13	0.245283	23	0.00919356
MTX2	13	0.245283	25	0.00240948
MXD1	13	0.245283	24	0.00480135
MYL1	13	0.245283	25	0.00240948
MYO3B	13	0.245283	24	0.00480135
NAA35	13	0.245283	23	0.00919356
NAB1	13	0.245283	25	0.00240948
NAGK	13	0.245283	24	0.00480135
NANS	13	0.245283	23	0.00919356
NAT8	13	0.245283	24	0.00480135
NBEAL1	13	0.245283	25	0.00240948
NCBP1	13	0.245283	23	0.00919356
NCKAP1	13	0.245283	23	0.00919356
NDUFAF7	13	0.245283	23	0.00919356
NDUFB3	13	0.245283	24	0.00480135
NDUFS1	13	0.245283	25	0.00240948
NEUROD1	13	0.245283	23	0.00919356
NFE2L2	13	0.245283	25	0.00240948
NFIL3	13	0.245283	23	0.00919356
NFU1	13	0.245283	24	0.00480135
NHEJ1	13	0.245283	23	0.00919356
NIF3L1	13	0.245283	24	0.00480135
NINJ1	13	0.245283	23	0.00919356
NLRC4	13	0.245283	24	0.00480135
NOL8	13	0.245283	23	0.00919356
NOP58	13	0.245283	24	0.00480135
NOTO	13	0.245283	24	0.00480135
NR4A3	13	0.245283	24	0.00480135
NRBP1	13	0.245283	24	0.00480135
NTRK2	13	0.245283	23	0.00919356
NUP35	13	0.245283	23	0.00919356
NUTM2F	13	0.245283	23	0.00919356
NUTM2G	13	0.245283	23	0.00919356
NYAP2	13	0.245283	23	0.00919356
OBSL1	13	0.245283	23	0.00919356
OLA1	13	0.245283	25	0.00240948
OR13C2	13	0.245283	24	0.00480135
OR13C3	13	0.245283	24	0.00480135
OR13C4	13	0.245283	24	0.00480135
OR13C5	13	0.245283	24	0.00480135
OR13C8	13	0.245283	24	0.00480135
OR13C9	13	0.245283	24	0.00480135
OR13F1	13	0.245283	24	0.00480135
ORC2	13	0.245283	24	0.00480135
ORMDL1	13	0.245283	25	0.00240948
OSBPL6	13	0.245283	25	0.00240948
OSGEPL1	13	0.245283	25	0.00240948
OST4	13	0.245283	24	0.00480135
OTOF	13	0.245283	23	0.00919356
OTX1	13	0.245283	24	0.00480135
OXER1	13	0.245283	23	0.00919356
PAIP2B	13	0.245283	24	0.00480135
PAPOLG	13	0.245283	24	0.00480135
PARD3B	13	0.245283	25	0.00240948
PAX3	13	0.245283	23	0.00919356
PCBP1	13	0.245283	24	0.00480135
PCGF1	13	0.245283	24	0.00480135
PCYOX1	13	0.245283	24	0.00480135
PDE11A	13	0.245283	25	0.00240948
PDE1A	13	0.245283	23	0.00919356
PDK1	13	0.245283	24	0.00480135
PECR	13	0.245283	23	0.00919356
PELI1	13	0.245283	24	0.00480135
PEX13	13	0.245283	24	0.00480135
PGAP1	13	0.245283	25	0.00240948
PHF2	13	0.245283	23	0.00919356
PIKFYVE	13	0.245283	25	0.00240948
PKDCC	13	0.245283	23	0.00919356
PLB1	13	0.245283	24	0.00480135
PLCD4	13	0.245283	23	0.00919356
PLCL1	13	0.245283	24	0.00480135
PLEK	13	0.245283	24	0.00480135
PLEKHA3	13	0.245283	24	0.00480135
PLEKHH2	13	0.245283	23	0.00919356
PLEKHM3	13	0.245283	25	0.00240948
PMS1	13	0.245283	25	0.00240948
PNKD	13	0.245283	23	0.00919356
PNO1	13	0.245283	24	0.00480135
PNPT1	13	0.245283	23	0.00919356
POLE4	13	0.245283	24	0.00480135
POMC	13	0.245283	23	0.00919356
PPIG	13	0.245283	24	0.00480135
PPIL3	13	0.245283	24	0.00480135
PPM1G	13	0.245283	24	0.00480135
PPP1CB	13	0.245283	24	0.00480135
PPP1R1C	13	0.245283	23	0.00919356
PPP3R1	13	0.245283	24	0.00480135
PRADC1	13	0.245283	24	0.00480135
PREB	13	0.245283	24	0.00480135
PRKAG3	13	0.245283	23	0.00919356
PRKD3	13	0.245283	23	0.00919356
PRKRA	13	0.245283	25	0.00240948
PROKR1	13	0.245283	24	0.00480135
PRR30	13	0.245283	24	0.00480135
PTCH1	13	0.245283	23	0.00919356
PTH2R	13	0.245283	25	0.00240948
PTPDC1	13	0.245283	23	0.00919356
PTPRN	13	0.245283	23	0.00919356
PUS10	13	0.245283	24	0.00480135
QPCT	13	0.245283	23	0.00919356
RAB10	13	0.245283	23	0.00919356
RAB11FIP5	13	0.245283	24	0.00480135
RAB1A	13	0.245283	23	0.00919356
RAPGEF4	13	0.245283	24	0.00480135
RAPH1	13	0.245283	25	0.00240948
RASGRP3	13	0.245283	23	0.00919356
RBKS	13	0.245283	24	0.00480135
RBM45	13	0.245283	25	0.00240948
REL	13	0.245283	24	0.00480135
RESP18	13	0.245283	23	0.00919356
RFTN2	13	0.245283	25	0.00240948
RHBDD1	13	0.245283	23	0.00919356
RMDN2	13	0.245283	23	0.00919356
RNF25	13	0.245283	23	0.00919356
ROR2	13	0.245283	23	0.00919356
RPE	13	0.245283	25	0.00240948
RPL37A	13	0.245283	23	0.00919356
RPS27A	13	0.245283	23	0.00919356
RTKN	13	0.245283	24	0.00480135
RTN4	13	0.245283	23	0.00919356
S1PR3	13	0.245283	23	0.00919356
SATB2	13	0.245283	24	0.00480135
SCG2	13	0.245283	23	0.00919356
SCRN3	13	0.245283	25	0.00240948
SEC61B	13	0.245283	24	0.00480135
SECISBP2	13	0.245283	23	0.00919356
SEMA4D	13	0.245283	23	0.00919356
SEMA4F	13	0.245283	24	0.00480135
SERTAD2	13	0.245283	23	0.00919356
SESTD1	13	0.245283	24	0.00480135
SF3B1	13	0.245283	25	0.00240948
SFXN5	13	0.245283	24	0.00480135
SGPP2	13	0.245283	23	0.00919356
SHC3	13	0.245283	23	0.00919356
SLC11A1	13	0.245283	23	0.00919356
SLC19A3	13	0.245283	23	0.00919356
SLC1A4	13	0.245283	23	0.00919356
SLC23A3	13	0.245283	23	0.00919356
SLC25A12	13	0.245283	24	0.00480135
SLC30A3	13	0.245283	24	0.00480135
SLC30A6	13	0.245283	24	0.00480135
SLC35D2	13	0.245283	23	0.00919356
SLC35F6	13	0.245283	23	0.00919356
SLC39A10	13	0.245283	25	0.00240948
SLC40A1	13	0.245283	25	0.00240948
SLC4A1AP	13	0.245283	24	0.00480135
SLC4A3	13	0.245283	23	0.00919356
SLC4A5	13	0.245283	24	0.00480135
SLC5A6	13	0.245283	24	0.00480135
SMARCAL1	13	0.245283	23	0.00919356
SMC2	13	0.245283	24	0.00480135
SMYD5	13	0.245283	23	0.00919356
SNRNP27	13	0.245283	24	0.00480135
SNRPG	13	0.245283	24	0.00480135
SNX17	13	0.245283	24	0.00480135
SOS1	13	0.245283	23	0.00919356
SP9	13	0.245283	25	0.00240948
SPAG16	13	0.245283	24	0.00480135
SPAST	13	0.245283	24	0.00480135
SPATA31A3	13	0.245283	25	0.00240948
SPATS2L	13	0.245283	24	0.00480135
SPDYA	13	0.245283	24	0.00480135
SPEG	13	0.245283	23	0.00919356
SPR	13	0.245283	24	0.00480135
SPRED2	13	0.245283	23	0.00919356
SPTBN1	13	0.245283	23	0.00919356
SPTLC1	13	0.245283	23	0.00919356
SRD5A2	13	0.245283	24	0.00480135
SSB	13	0.245283	24	0.00480135
STAMBP	13	0.245283	24	0.00480135
STAT4	13	0.245283	25	0.00240948
STK11IP	13	0.245283	23	0.00919356
STK16	13	0.245283	23	0.00919356
STK17B	13	0.245283	25	0.00240948
STK36	13	0.245283	23	0.00919356
STK39	13	0.245283	24	0.00480135
STRADB	13	0.245283	24	0.00480135
STRN	13	0.245283	23	0.00919356
STX17	13	0.245283	24	0.00480135
SULT6B1	13	0.245283	23	0.00919356
SUMO1	13	0.245283	24	0.00480135
SUPT7L	13	0.245283	24	0.00480135
SUSD3	13	0.245283	23	0.00919356
SYK	13	0.245283	23	0.00919356
TACR1	13	0.245283	24	0.00480135
TBC1D2	13	0.245283	23	0.00919356
TCF23	13	0.245283	24	0.00480135
TDRD7	13	0.245283	23	0.00919356
TET3	13	0.245283	24	0.00480135
TEX10	13	0.245283	24	0.00480135
TEX261	13	0.245283	24	0.00480135
TFPI	13	0.245283	23	0.00919356
TGFA	13	0.245283	24	0.00480135
TGFBR1	13	0.245283	24	0.00480135
THADA	13	0.245283	23	0.00919356
THUMPD2	13	0.245283	23	0.00919356
TIA1	13	0.245283	24	0.00480135
TLK1	13	0.245283	24	0.00480135
TLX2	13	0.245283	24	0.00480135
TM4SF20	13	0.245283	23	0.00919356
TMEM169	13	0.245283	23	0.00919356
TMEM17	13	0.245283	24	0.00480135
TMEM178A	13	0.245283	23	0.00919356
TMEM198	13	0.245283	23	0.00919356
TMEM214	13	0.245283	24	0.00480135
TMEM237	13	0.245283	24	0.00480135
TMOD1	13	0.245283	23	0.00919356
TNS1	13	0.245283	23	0.00919356
TPRKB	13	0.245283	24	0.00480135
TRAK2	13	0.245283	24	0.00480135
TRIM14	13	0.245283	23	0.00919356
TRIM54	13	0.245283	24	0.00480135
TRMT61B	13	0.245283	24	0.00480135
TSTD2	13	0.245283	23	0.00919356
TTC27	13	0.245283	23	0.00919356
TTC30A	13	0.245283	25	0.00240948
TTC30B	13	0.245283	25	0.00240948
TTC31	13	0.245283	24	0.00480135
TTLL4	13	0.245283	23	0.00919356
TTN	13	0.245283	24	0.00480135
TUBA4A	13	0.245283	23	0.00919356
TYW5	13	0.245283	24	0.00480135
UBE2E3	13	0.245283	23	0.00919356
UBR3	13	0.245283	24	0.00480135
UBXN2A	13	0.245283	23	0.00919356
UCN	13	0.245283	24	0.00480135
UGP2	13	0.245283	24	0.00480135
UNC80	13	0.245283	25	0.00240948
USP34	13	0.245283	24	0.00480135
USP37	13	0.245283	23	0.00919356
VAX2	13	0.245283	24	0.00480135
VIL1	13	0.245283	23	0.00919356
VIT	13	0.245283	23	0.00919356
VPS54	13	0.245283	24	0.00480135
VWC2L	13	0.245283	24	0.00480135
WDFY1	13	0.245283	23	0.00919356
WDPCP	13	0.245283	24	0.00480135
WDR12	13	0.245283	25	0.00240948
WDR43	13	0.245283	24	0.00480135
WDR54	13	0.245283	24	0.00480135
WDR75	13	0.245283	25	0.00240948
WDR92	13	0.245283	24	0.00480135
WIPF1	13	0.245283	25	0.00240948
WNK2	13	0.245283	23	0.00919356
WNT10A	13	0.245283	23	0.00919356
WNT6	13	0.245283	23	0.00919356
XDH	13	0.245283	24	0.00480135
XIRP2	13	0.245283	24	0.00480135
XPA	13	0.245283	23	0.00919356
XPO1	13	0.245283	24	0.00480135
XRCC5	13	0.245283	23	0.00919356
YIPF4	13	0.245283	24	0.00480135
YPEL5	13	0.245283	24	0.00480135
ZC3H15	13	0.245283	23	0.00919356
ZDBF2	13	0.245283	25	0.00240948
ZFAND2B	13	0.245283	23	0.00919356
ZFP36L2	13	0.245283	23	0.00919356
ZNF142	13	0.245283	23	0.00919356
ZNF169	13	0.245283	23	0.00919356
ZNF189	13	0.245283	24	0.00480135
ZNF367	13	0.245283	23	0.00919356
ZNF385B	13	0.245283	24	0.00480135
ZNF484	13	0.245283	23	0.00919356
ZNF510	13	0.245283	23	0.00919356
ZNF512	13	0.245283	24	0.00480135
ZNF513	13	0.245283	24	0.00480135
ZNF638	13	0.245283	24	0.00480135
ZNF658	13	0.245283	25	0.00240948
ZNF782	13	0.245283	23	0.00919356
ZNF804A	13	0.245283	23	0.00919356
ZSWIM2	13	0.245283	23	0.00919356
ABCG5	12	0.226415	23	0.00490865
ABCG8	12	0.226415	23	0.00490865
ACKR3	12	0.226415	22	0.00938395
ACVR1	12	0.226415	25	0.00119555
ACVR1C	12	0.226415	25	0.00119555
APOB	12	0.226415	23	0.00490865
ARL6IP6	12	0.226415	25	0.00119555
ASB18	12	0.226415	22	0.00938395
ATAD2B	12	0.226415	24	0.0024705
ATOH8	12	0.226415	24	0.0024705
ATP6V1C2	12	0.226415	23	0.00490865
ATP6V1E2	12	0.226415	23	0.00490865
BAZ2B	12	0.226415	25	0.00119555
BUB1	12	0.226415	24	0.0024705
CALM2	12	0.226415	23	0.00490865
CAMKMT	12	0.226415	23	0.00490865
CAPG	12	0.226415	24	0.0024705
CCDC148	12	0.226415	25	0.00119555
CD8A	12	0.226415	24	0.0024705
CD8B	12	0.226415	24	0.0024705
COL6A3	12	0.226415	22	0.00938395
COPS8	12	0.226415	22	0.00938395
CRIPT	12	0.226415	23	0.00490865
CTNNA2	12	0.226415	25	0.00119555
CYTIP	12	0.226415	25	0.00119555
DAPL1	12	0.226415	25	0.00119555
DDX1	12	0.226415	23	0.00490865
DNAH6	12	0.226415	24	0.0024705
DPP4	12	0.226415	24	0.0024705
DYNC2LI1	12	0.226415	23	0.00490865
E2F6	12	0.226415	23	0.00490865
EIF2AK3	12	0.226415	24	0.0024705
ELMOD3	12	0.226415	24	0.0024705
EPAS1	12	0.226415	23	0.00490865
EPCAM	12	0.226415	23	0.00490865
ERMN	12	0.226415	25	0.00119555
FABP1	12	0.226415	24	0.0024705
FAP	12	0.226415	24	0.0024705
FBXO11	12	0.226415	23	0.00490865
FIGN	12	0.226415	24	0.0024705
FMNL2	12	0.226415	25	0.00119555
FOXI3	12	0.226415	24	0.0024705
FOXN2	12	0.226415	23	0.00490865
FSHR	12	0.226415	23	0.00490865
GALNT13	12	0.226415	25	0.00119555
GALNT5	12	0.226415	25	0.00119555
GBX2	12	0.226415	22	0.00938395
GCA	12	0.226415	24	0.0024705
GDF7	12	0.226415	23	0.00490865
GEN1	12	0.226415	22	0.00938395
GGCX	12	0.226415	24	0.0024705
GNLY	12	0.226415	24	0.0024705
GPD2	12	0.226415	25	0.00119555
GRB14	12	0.226415	24	0.0024705
GREB1	12	0.226415	23	0.00490865
HS1BP3	12	0.226415	23	0.00490865
IFIH1	12	0.226415	24	0.0024705
IMMT	12	0.226415	24	0.0024705
IQCA1	12	0.226415	22	0.00938395
ITGB6	12	0.226415	25	0.00119555
KCMF1	12	0.226415	24	0.0024705
KCNH7	12	0.226415	24	0.0024705
KCNJ3	12	0.226415	25	0.00119555
KCNK12	12	0.226415	23	0.00490865
KDM3A	12	0.226415	24	0.0024705
KLHL29	12	0.226415	24	0.0024705
KRCC1	12	0.226415	24	0.0024705
LAPTM4A	12	0.226415	22	0.00938395
LPIN1	12	0.226415	23	0.00490865
LRPPRC	12	0.226415	23	0.00490865
LRRFIP1	12	0.226415	22	0.00938395
LRRTM4	12	0.226415	24	0.0024705
MAT2A	12	0.226415	24	0.0024705
MATN3	12	0.226415	22	0.00938395
MCFD2	12	0.226415	23	0.00490865
MLPH	12	0.226415	22	0.00938395
MRPL35	12	0.226415	24	0.0024705
MSGN1	12	0.226415	22	0.00938395
MSH2	12	0.226415	23	0.00490865
MSH6	12	0.226415	23	0.00490865
MYCN	12	0.226415	23	0.00490865
MYO1B	12	0.226415	25	0.00119555
NABP1	12	0.226415	25	0.00119555
NBAS	12	0.226415	23	0.00490865
NOL10	12	0.226415	23	0.00490865
NR4A2	12	0.226415	25	0.00119555
NTSR2	12	0.226415	23	0.00490865
OSR1	12	0.226415	22	0.00938395
PIGF	12	0.226415	23	0.00490865
PKP4	12	0.226415	25	0.00119555
PLA2R1	12	0.226415	25	0.00119555
POLR1A	12	0.226415	24	0.0024705
PPM1B	12	0.226415	23	0.00490865
PPP1R21	12	0.226415	23	0.00490865
PREPL	12	0.226415	23	0.00490865
PRKCE	12	0.226415	23	0.00490865
PRLH	12	0.226415	22	0.00938395
PRPF40A	12	0.226415	25	0.00119555
PSMD14	12	0.226415	24	0.0024705
PTCD3	12	0.226415	24	0.0024705
PUM2	12	0.226415	22	0.00938395
RAB17	12	0.226415	22	0.00938395
RAD51AP2	12	0.226415	22	0.00938395
RBM44	12	0.226415	22	0.00938395
RBMS1	12	0.226415	25	0.00119555
REEP1	12	0.226415	24	0.0024705
REG1A	12	0.226415	25	0.00119555
REG1B	12	0.226415	25	0.00119555
REG3A	12	0.226415	25	0.00119555
REG3G	12	0.226415	25	0.00119555
RETSAT	12	0.226415	24	0.0024705
RHOB	12	0.226415	22	0.00938395
RHOQ	12	0.226415	23	0.00490865
RMND5A	12	0.226415	24	0.0024705
RNF181	12	0.226415	24	0.0024705
RPIA	12	0.226415	24	0.0024705
RPRM	12	0.226415	25	0.00119555
SCN2A	12	0.226415	24	0.0024705
SCN3A	12	0.226415	24	0.0024705
SDC1	12	0.226415	22	0.00938395
SFTPB	12	0.226415	24	0.0024705
SIX2	12	0.226415	23	0.00490865
SIX3	12	0.226415	23	0.00490865
SLC38A11	12	0.226415	24	0.0024705
SLC3A1	12	0.226415	23	0.00490865
SLC4A10	12	0.226415	24	0.0024705
SMC6	12	0.226415	22	0.00938395
SMYD1	12	0.226415	24	0.0024705
SOCS5	12	0.226415	23	0.00490865
SRBD1	12	0.226415	23	0.00490865
ST3GAL5	12	0.226415	24	0.0024705
STAM2	12	0.226415	25	0.00119555
STON1-GTF2A1L	12	0.226415	23	0.00490865
SUCLG1	12	0.226415	24	0.0024705
TANC1	12	0.226415	25	0.00119555
TANK	12	0.226415	25	0.00119555
TBR1	12	0.226415	24	0.0024705
TCF7L1	12	0.226415	24	0.0024705
TEX37	12	0.226415	24	0.0024705
TGOLN2	12	0.226415	24	0.0024705
THNSL2	12	0.226415	24	0.0024705
TMEFF2	12	0.226415	25	0.00119555
TMEM150A	12	0.226415	24	0.0024705
TMEM247	12	0.226415	23	0.00490865
TMSB10	12	0.226415	24	0.0024705
TRABD2A	12	0.226415	24	0.0024705
TRIB2	12	0.226415	23	0.00490865
TTC32	12	0.226415	22	0.00938395
TTC7A	12	0.226415	23	0.00490865
UPP2	12	0.226415	25	0.00119555
USP39	12	0.226415	24	0.0024705
VAMP5	12	0.226415	24	0.0024705
VAMP8	12	0.226415	24	0.0024705
VRK2	12	0.226415	23	0.00490865
WDR35	12	0.226415	22	0.00938395
WDSUB1	12	0.226415	25	0.00119555
ACOXL	11	0.207547	24	0.00120519
ACTR1B	11	0.207547	25	0.000562476
ACVR2A	11	0.207547	25	0.000562476
ADRA2B	11	0.207547	26	0.000252401
AFF3	11	0.207547	25	0.000562476
ANAPC1	11	0.207547	24	0.00120519
ANKRD23	11	0.207547	25	0.000562476
ANKRD36B	11	0.207547	25	0.000562476
ANKRD39	11	0.207547	25	0.000562476
ARHGAP15	11	0.207547	25	0.000562476
ARID5A	11	0.207547	25	0.000562476
ARL5A	11	0.207547	25	0.000562476
ASTL	11	0.207547	26	0.000252401
BCL2L11	11	0.207547	24	0.00120519
C2orf49	11	0.207547	25	0.000562476
CACNB4	11	0.207547	25	0.000562476
CCDC138	11	0.207547	25	0.000562476
CHST10	11	0.207547	25	0.000562476
CIAO1	11	0.207547	26	0.000252401
CNGA3	11	0.207547	25	0.000562476
CNNM3	11	0.207547	25	0.000562476
CNNM4	11	0.207547	25	0.000562476
CNOT11	11	0.207547	25	0.000562476
COA5	11	0.207547	25	0.000562476
COX5B	11	0.207547	25	0.000562476
CREG2	11	0.207547	25	0.000562476
CXCR4	11	0.207547	25	0.000562476
DUSP2	11	0.207547	26	0.000252401
EDAR	11	0.207547	25	0.000562476
EIF5B	11	0.207547	25	0.000562476
EPC2	11	0.207547	25	0.000562476
FAHD2A	11	0.207547	25	0.000562476
FAHD2B	11	0.207547	25	0.000562476
FAM178B	11	0.207547	25	0.000562476
FBLN7	11	0.207547	24	0.00120519
FER1L5	11	0.207547	25	0.000562476
FHL2	11	0.207547	25	0.000562476
GCC2	11	0.207547	25	0.000562476
GPAT2	11	0.207547	21	0.00943366
GPR45	11	0.207547	25	0.000562476
GTDC1	11	0.207547	25	0.000562476
HNMT	11	0.207547	25	0.000562476
IL18R1	11	0.207547	25	0.000562476
IL18RAP	11	0.207547	25	0.000562476
IL1R1	11	0.207547	25	0.000562476
IL1R2	11	0.207547	25	0.000562476
IL1RL1	11	0.207547	25	0.000562476
IL1RL2	11	0.207547	25	0.000562476
INPP4A	11	0.207547	25	0.000562476
ITPRIPL1	11	0.207547	26	0.000252401
KANSL3	11	0.207547	25	0.000562476
KCNIP3	11	0.207547	25	0.000562476
KIF5C	11	0.207547	25	0.000562476
KYNU	11	0.207547	25	0.000562476
LIMS1	11	0.207547	25	0.000562476
LIPT1	11	0.207547	25	0.000562476
LMAN2L	11	0.207547	25	0.000562476
LONRF2	11	0.207547	25	0.000562476
LRP1B	11	0.207547	25	0.000562476
LYG1	11	0.207547	25	0.000562476
LYG2	11	0.207547	25	0.000562476
LYPD6	11	0.207547	25	0.000562476
LYPD6B	11	0.207547	25	0.000562476
MAL	11	0.207547	25	0.000562476
MALL	11	0.207547	24	0.00120519
MAP4K4	11	0.207547	25	0.000562476
MBD5	11	0.207547	25	0.000562476
MERTK	11	0.207547	24	0.00120519
MFSD9	11	0.207547	25	0.000562476
MGAT4A	11	0.207547	25	0.000562476
MITD1	11	0.207547	25	0.000562476
MMADHC	11	0.207547	25	0.000562476
MRPL30	11	0.207547	25	0.000562476
MRPS5	11	0.207547	25	0.000562476
MRPS9	11	0.207547	25	0.000562476
NCAPH	11	0.207547	26	0.000252401
NCK2	11	0.207547	25	0.000562476
NEB	11	0.207547	25	0.000562476
NEURL3	11	0.207547	25	0.000562476
NMI	11	0.207547	25	0.000562476
NMS	11	0.207547	25	0.000562476
NPAS2	11	0.207547	25	0.000562476
NPHP1	11	0.207547	24	0.00120519
NXPH2	11	0.207547	25	0.000562476
ORC4	11	0.207547	25	0.000562476
PDCL3	11	0.207547	25	0.000562476
POU3F3	11	0.207547	25	0.000562476
PROM2	11	0.207547	25	0.000562476
RANBP2	11	0.207547	25	0.000562476
RBM43	11	0.207547	25	0.000562476
REV1	11	0.207547	25	0.000562476
RFX8	11	0.207547	25	0.000562476
RGPD3	11	0.207547	25	0.000562476
RGPD4	11	0.207547	25	0.000562476
RIF1	11	0.207547	25	0.000562476
RND3	11	0.207547	25	0.000562476
RNF149	11	0.207547	25	0.000562476
RPL31	11	0.207547	25	0.000562476
SEMA4C	11	0.207547	25	0.000562476
SH3RF3	11	0.207547	25	0.000562476
SLC5A7	11	0.207547	25	0.000562476
SLC9A2	11	0.207547	25	0.000562476
SLC9A4	11	0.207547	25	0.000562476
SNRNP200	11	0.207547	26	0.000252401
SOWAHC	11	0.207547	25	0.000562476
SPOPL	11	0.207547	25	0.000562476
ST6GAL2	11	0.207547	25	0.000562476
STARD7	11	0.207547	26	0.000252401
SULT1C2	11	0.207547	25	0.000562476
SULT1C3	11	0.207547	25	0.000562476
SULT1C4	11	0.207547	25	0.000562476
TBC1D8	11	0.207547	25	0.000562476
TGFBRAP1	11	0.207547	25	0.000562476
THSD7B	11	0.207547	25	0.000562476
TMEM127	11	0.207547	26	0.000252401
TMEM131	11	0.207547	25	0.000562476
TMEM182	11	0.207547	25	0.000562476
TMEM87B	11	0.207547	24	0.00120519
TRIM43	11	0.207547	25	0.000562476
TSGA10	11	0.207547	25	0.000562476
TXNDC9	11	0.207547	25	0.000562476
UNC50	11	0.207547	25	0.000562476
UXS1	11	0.207547	25	0.000562476
VWA3B	11	0.207547	25	0.000562476
ZAP70	11	0.207547	25	0.000562476
ZEB2	11	0.207547	25	0.000562476
ZNF2	11	0.207547	25	0.000562476
ZNF514	11	0.207547	25	0.000562476

## Sheet: CNV_Variant1_freq>20%,p<0.05
	variant1	freq	other	prop3_pvalue
HDX	10	0.666667	29	0.0469355
ASMT	9	0.6	24	0.0440669
ASMTL	9	0.6	23	0.0339012
DHRSX	9	0.6	24	0.0440669
SHOX	9	0.6	24	0.0440669
AGAP1	8	0.533333	20	0.0494602
AGXT2	8	0.533333	67	0.0377577
AHRR	8	0.533333	67	0.0377577
AIFM3	8	0.533333	16	0.0136782
ALPI	8	0.533333	19	0.0372325
ANKH	8	0.533333	67	0.0377577
ANKRD33B	8	0.533333	67	0.0377577
ARL4C	8	0.533333	19	0.0372325
ARVCF	8	0.533333	17	0.0196365
ASB1	8	0.533333	20	0.0494602
ASPHD2	8	0.533333	12	0.00221923
ATG16L1	8	0.533333	19	0.0372325
BASP1	8	0.533333	67	0.0377577
BCL2L13	8	0.533333	18	0.0273891
BCR	8	0.533333	12	0.00221923
BID	8	0.533333	18	0.0273891
BRD9	8	0.533333	67	0.0377577
BRIX1	8	0.533333	67	0.0377577
C22orf15	8	0.533333	12	0.00221923
C22orf39	8	0.533333	17	0.0196365
CABIN1	8	0.533333	11	0.00124695
CAPSL	8	0.533333	67	0.0377577
CCDC116	8	0.533333	14	0.00599464
CCDC127	8	0.533333	67	0.0377577
CCT5	8	0.533333	67	0.0377577
CDC45	8	0.533333	17	0.0196365
CEP72	8	0.533333	67	0.0377577
CHCHD10	8	0.533333	12	0.00221923
CHRND	8	0.533333	19	0.0372325
CHRNG	8	0.533333	19	0.0372325
CLDN5	8	0.533333	17	0.0196365
CLPTM1L	8	0.533333	67	0.0377577
CLTCL1	8	0.533333	17	0.0196365
CMBL	8	0.533333	67	0.0377577
COMT	8	0.533333	17	0.0196365
COPS7B	8	0.533333	19	0.0372325
CRKL	8	0.533333	16	0.0136782
CRYBA4	8	0.533333	12	0.00221923
CRYBB1	8	0.533333	12	0.00221923
CRYBB2	8	0.533333	11	0.00124695
CRYBB3	8	0.533333	11	0.00124695
CTNND2	8	0.533333	67	0.0377577
DAP	8	0.533333	67	0.0377577
DGCR2	8	0.533333	17	0.0196365
DGCR6L	8	0.533333	16	0.0136782
DGCR8	8	0.533333	17	0.0196365
DGKD	8	0.533333	19	0.0372325
DIS3L2	8	0.533333	19	0.0372325
DNAJC21	8	0.533333	67	0.0377577
ECEL1	8	0.533333	19	0.0372325
EFHD1	8	0.533333	19	0.0372325
EGFLAM	8	0.533333	67	0.0377577
EIF4E2	8	0.533333	19	0.0372325
ESPNL	8	0.533333	20	0.0494602
EXOC3	8	0.533333	67	0.0377577
FBXO36	8	0.533333	20	0.0494602
GDNF	8	0.533333	67	0.0377577
GGT1	8	0.533333	11	0.00124695
GGT5	8	0.533333	11	0.00124695
GGTLC2	8	0.533333	14	0.00599464
GIGYF2	8	0.533333	19	0.0372325
GNB1L	8	0.533333	17	0.0196365
GOLPH3	8	0.533333	67	0.0377577
GPC1	8	0.533333	20	0.0494602
GPR39	8	0.533333	19	0.0372325
GSC2	8	0.533333	17	0.0196365
GUCD1	8	0.533333	11	0.00124695
GYPC	8	0.533333	20	0.0494602
HDAC4	8	0.533333	20	0.0494602
HES6	8	0.533333	20	0.0494602
HIRA	8	0.533333	17	0.0196365
HJURP	8	0.533333	19	0.0372325
HPS4	8	0.533333	12	0.00221923
IGLL1	8	0.533333	12	0.00221923
IGLL5	8	0.533333	13	0.00373617
IL7R	8	0.533333	67	0.0377577
ILKAP	8	0.533333	20	0.0494602
INPP5D	8	0.533333	19	0.0372325
IRX4	8	0.533333	67	0.0377577
KIAA1671	8	0.533333	11	0.00124695
KLHL22	8	0.533333	17	0.0196365
KLHL30	8	0.533333	20	0.0494602
LMBRD2	8	0.533333	67	0.0377577
LPCAT1	8	0.533333	67	0.0377577
LRP5L	8	0.533333	12	0.00221923
LRRC14B	8	0.533333	67	0.0377577
LYPD1	8	0.533333	19	0.0372325
LZTR1	8	0.533333	16	0.0136782
MAPK1	8	0.533333	13	0.00373617
MED15	8	0.533333	17	0.0196365
MICAL3	8	0.533333	18	0.0273891
MMP11	8	0.533333	12	0.00221923
MN1	8	0.533333	12	0.00221923
MROH2A	8	0.533333	19	0.0372325
MRPL36	8	0.533333	67	0.0377577
MRPL40	8	0.533333	17	0.0196365
MTMR12	8	0.533333	67	0.0377577
MYO18B	8	0.533333	11	0.00124695
NADK2	8	0.533333	67	0.0377577
NCKAP5	8	0.533333	19	0.0372325
NDUFA10	8	0.533333	19	0.0372325
NDUFS6	8	0.533333	67	0.0377577
NEU2	8	0.533333	19	0.0372325
NGEF	8	0.533333	19	0.0372325
NIPBL	8	0.533333	67	0.0377577
NKD2	8	0.533333	67	0.0377577
NMUR1	8	0.533333	20	0.0494602
NPPC	8	0.533333	19	0.0372325
NPR3	8	0.533333	67	0.0377577
NUP155	8	0.533333	67	0.0377577
OR6B3	8	0.533333	19	0.0372325
OTOS	8	0.533333	19	0.0372325
P2RX6	8	0.533333	16	0.0136782
PDCD6	8	0.533333	67	0.0377577
PDE6D	8	0.533333	19	0.0372325
PDZD2	8	0.533333	67	0.0377577
PER2	8	0.533333	20	0.0494602
PEX26	8	0.533333	18	0.0273891
PI4KA	8	0.533333	17	0.0196365
PITPNB	8	0.533333	12	0.00221923
PIWIL3	8	0.533333	11	0.00124695
PLEKHG4B	8	0.533333	67	0.0377577
PPIL2	8	0.533333	14	0.00599464
PPM1F	8	0.533333	13	0.00373617
PRAME	8	0.533333	14	0.00599464
PRLR	8	0.533333	67	0.0377577
PRSS56	8	0.533333	19	0.0372325
PTMA	8	0.533333	19	0.0372325
RAB36	8	0.533333	12	0.00221923
RAD1	8	0.533333	67	0.0377577
RAMP1	8	0.533333	20	0.0494602
RANBP1	8	0.533333	17	0.0196365
RANBP3L	8	0.533333	67	0.0377577
RIMBP3	8	0.533333	20	0.0494602
ROPN1L	8	0.533333	67	0.0377577
RTN4R	8	0.533333	16	0.0136782
SAG	8	0.533333	19	0.0372325
SCARF2	8	0.533333	17	0.0196365
SDF2L1	8	0.533333	14	0.00599464
SDHA	8	0.533333	67	0.0377577
SEZ6L	8	0.533333	12	0.00221923
SGSM1	8	0.533333	11	0.00124695
SH3BP4	8	0.533333	20	0.0494602
SKP2	8	0.533333	67	0.0377577
SLC16A14	8	0.533333	20	0.0494602
SLC1A3	8	0.533333	67	0.0377577
SLC25A1	8	0.533333	17	0.0196365
SLC6A18	8	0.533333	67	0.0377577
SLC6A19	8	0.533333	67	0.0377577
SLC6A3	8	0.533333	67	0.0377577
SLC7A4	8	0.533333	16	0.0136782
SLC9A3	8	0.533333	67	0.0377577
SMARCB1	8	0.533333	12	0.00221923
SNAP29	8	0.533333	17	0.0196365
SNED1	8	0.533333	20	0.0494602
SNRPD3	8	0.533333	11	0.00124695
SP100	8	0.533333	20	0.0494602
SP110	8	0.533333	20	0.0494602
SP140	8	0.533333	20	0.0494602
SP140L	8	0.533333	20	0.0494602
SPEF2	8	0.533333	67	0.0377577
SPP2	8	0.533333	19	0.0372325
SRRD	8	0.533333	12	0.00221923
SUB1	8	0.533333	67	0.0377577
SUSD2	8	0.533333	11	0.00124695
TANGO2	8	0.533333	17	0.0196365
TBX1	8	0.533333	17	0.0196365
TERT	8	0.533333	67	0.0377577
TFIP11	8	0.533333	12	0.00221923
THAP7	8	0.533333	16	0.0136782
TMEM191B	8	0.533333	20	0.0494602
TMEM211	8	0.533333	11	0.00124695
TOP3B	8	0.533333	14	0.00599464
TPPP	8	0.533333	67	0.0377577
TPST2	8	0.533333	12	0.00221923
TRAF3IP1	8	0.533333	20	0.0494602
TRIO	8	0.533333	67	0.0377577
TRIP12	8	0.533333	20	0.0494602
TRIP13	8	0.533333	67	0.0377577
TRMT2A	8	0.533333	17	0.0196365
TRPM8	8	0.533333	19	0.0372325
TTC23L	8	0.533333	67	0.0377577
TTC28	8	0.533333	12	0.00221923
TUBA8	8	0.533333	18	0.0273891
TXNRD2	8	0.533333	17	0.0196365
UBE2L3	8	0.533333	15	0.00922331
UGT1A8	8	0.533333	19	0.0372325
UGT3A1	8	0.533333	67	0.0377577
UGT3A2	8	0.533333	67	0.0377577
UPB1	8	0.533333	11	0.00124695
USP18	8	0.533333	19	0.0372325
USP40	8	0.533333	19	0.0372325
VPREB1	8	0.533333	14	0.00599464
VPREB3	8	0.533333	12	0.00221923
WDR70	8	0.533333	67	0.0377577
YDJC	8	0.533333	14	0.00599464
YPEL1	8	0.533333	14	0.00599464
ZDHHC8	8	0.533333	17	0.0196365
ZFR	8	0.533333	67	0.0377577
ZNF280A	8	0.533333	14	0.00599464
ZNF280B	8	0.533333	14	0.00599464
ZNF70	8	0.533333	12	0.00221923
ZNF74	8	0.533333	17	0.0196365
ANKRD54	7	0.466667	13	0.0180266
AP1B1	7	0.466667	12	0.0117245
APOBEC3C	7	0.466667	11	0.00726043
APOBEC3D	7	0.466667	11	0.00726043
APOBEC3F	7	0.466667	11	0.00726043
APOBEC3G	7	0.466667	11	0.00726043
APOBEC3H	7	0.466667	11	0.00726043
APOL1	7	0.466667	12	0.0117245
APOL2	7	0.466667	11	0.00726043
APOL3	7	0.466667	11	0.00726043
APOL4	7	0.466667	11	0.00726043
APOL5	7	0.466667	11	0.00726043
APOL6	7	0.466667	11	0.00726043
ASCC2	7	0.466667	11	0.00726043
ATF4	7	0.466667	10	0.00424453
BAIAP2L2	7	0.466667	12	0.0117245
BPIFC	7	0.466667	12	0.0117245
C22orf23	7	0.466667	12	0.0117245
C22orf31	7	0.466667	13	0.0180266
C22orf42	7	0.466667	12	0.0117245
C5orf22	7	0.466667	67	0.00922331
CABP7	7	0.466667	12	0.0117245
CACNA1I	7	0.466667	10	0.00424453
CACNG2	7	0.466667	12	0.0117245
CBX6	7	0.466667	11	0.00726043
CBX7	7	0.466667	11	0.00726043
CBY1	7	0.466667	11	0.00726043
CCDC117	7	0.466667	13	0.0180266
CCDC157	7	0.466667	12	0.0117245
CDH10	7	0.466667	66	0.0136782
CDH12	7	0.466667	65	0.0196365
CDH18	7	0.466667	66	0.0136782
CDH6	7	0.466667	67	0.00922331
CDH9	7	0.466667	66	0.0136782
CHEK2	7	0.466667	13	0.0180266
DDX17	7	0.466667	11	0.00726043
DEPDC5	7	0.466667	12	0.0117245
DMC1	7	0.466667	11	0.00726043
DNAL4	7	0.466667	11	0.00726043
DRG1	7	0.466667	12	0.0117245
DROSHA	7	0.466667	67	0.00922331
EIF3D	7	0.466667	12	0.0117245
EIF3L	7	0.466667	13	0.0180266
EIF4ENIF1	7	0.466667	12	0.0117245
EMID1	7	0.466667	13	0.0180266
ENTHD1	7	0.466667	10	0.00424453
EWSR1	7	0.466667	13	0.0180266
FBXL7	7	0.466667	67	0.00922331
FBXO7	7	0.466667	12	0.0117245
FOXRED2	7	0.466667	12	0.0117245
GAL3ST1	7	0.466667	12	0.0117245
GALR3	7	0.466667	13	0.0180266
GAS2L1	7	0.466667	13	0.0180266
GCAT	7	0.466667	13	0.0180266
GTPBP1	7	0.466667	11	0.00726043
HMGXB4	7	0.466667	11	0.00726043
HMOX1	7	0.466667	11	0.00726043
HORMAD2	7	0.466667	11	0.00726043
HSCB	7	0.466667	13	0.0180266
IFT27	7	0.466667	12	0.0117245
INPP5J	7	0.466667	12	0.0117245
ISX	7	0.466667	11	0.00726043
JOSD1	7	0.466667	11	0.00726043
KCNJ4	7	0.466667	11	0.00726043
KDELR3	7	0.466667	11	0.00726043
KREMEN1	7	0.466667	13	0.0180266
LGALS1	7	0.466667	13	0.0180266
LIF	7	0.466667	12	0.0117245
LIMK2	7	0.466667	12	0.0117245
MAFF	7	0.466667	12	0.0117245
MB	7	0.466667	11	0.00726043
MCM5	7	0.466667	11	0.00726043
MGAT3	7	0.466667	10	0.00424453
MICALL1	7	0.466667	12	0.0117245
MIEF1	7	0.466667	10	0.00424453
MORC2	7	0.466667	12	0.0117245
MTFP1	7	0.466667	12	0.0117245
MTMR3	7	0.466667	11	0.00726043
MYH9	7	0.466667	12	0.0117245
MYO10	7	0.466667	67	0.00922331
NCF4	7	0.466667	13	0.0180266
NEFH	7	0.466667	12	0.0117245
NF2	7	0.466667	12	0.0117245
NIPSNAP1	7	0.466667	12	0.0117245
NOL12	7	0.466667	13	0.0180266
NPTXR	7	0.466667	11	0.00726043
OSBP2	7	0.466667	12	0.0117245
OSM	7	0.466667	12	0.0117245
PATZ1	7	0.466667	12	0.0117245
PDGFB	7	0.466667	10	0.00424453
PDXP	7	0.466667	13	0.0180266
PES1	7	0.466667	12	0.0117245
PICK1	7	0.466667	12	0.0117245
PIK3IP1	7	0.466667	12	0.0117245
PISD	7	0.466667	12	0.0117245
PLA2G3	7	0.466667	12	0.0117245
PLA2G6	7	0.466667	12	0.0117245
POLR2F	7	0.466667	12	0.0117245
PRDM9	7	0.466667	66	0.0136782
PRR14L	7	0.466667	12	0.0117245
PVALB	7	0.466667	12	0.0117245
RASD2	7	0.466667	11	0.00726043
RASL10A	7	0.466667	13	0.0180266
RBFOX2	7	0.466667	11	0.00726043
RFPL2	7	0.466667	12	0.0117245
RFPL3	7	0.466667	12	0.0117245
RHBDD3	7	0.466667	13	0.0180266
RNF185	7	0.466667	12	0.0117245
RNF215	7	0.466667	12	0.0117245
RPL3	7	0.466667	10	0.00424453
RPS19BP1	7	0.466667	10	0.00424453
RTCB	7	0.466667	12	0.0117245
SEC14L2	7	0.466667	12	0.0117245
SEC14L3	7	0.466667	12	0.0117245
SEC14L4	7	0.466667	12	0.0117245
SEC14L6	7	0.466667	12	0.0117245
SF3A1	7	0.466667	12	0.0117245
SFI1	7	0.466667	12	0.0117245
SLC16A8	7	0.466667	12	0.0117245
SLC35E4	7	0.466667	12	0.0117245
SLC5A1	7	0.466667	12	0.0117245
SMTN	7	0.466667	12	0.0117245
SUN2	7	0.466667	11	0.00726043
SYN3	7	0.466667	12	0.0117245
SYNGR1	7	0.466667	10	0.00424453
TAB1	7	0.466667	10	0.00424453
TBC1D10A	7	0.466667	12	0.0117245
TCN2	7	0.466667	12	0.0117245
THOC5	7	0.466667	12	0.0117245
TMEM184B	7	0.466667	12	0.0117245
TOM1	7	0.466667	11	0.00726043
TOMM22	7	0.466667	11	0.00726043
TRIOBP	7	0.466667	13	0.0180266
TXN2	7	0.466667	12	0.0117245
UQCR10	7	0.466667	11	0.00726043
YWHAH	7	0.466667	12	0.0117245
ZMAT5	7	0.466667	12	0.0117245
ZNF622	7	0.466667	67	0.00922331
ZNRF3	7	0.466667	13	0.0180266
ABCC9	4	0.266667	49	0.0370902
ACVR1B	4	0.266667	50	0.0295051
ACVRL1	4	0.266667	50	0.0295051
AEBP2	4	0.266667	49	0.0370902
AGAP2	4	0.266667	48	0.0461385
ANKRD33	4	0.266667	50	0.0295051
ANKRD52	4	0.266667	51	0.02321
APOF	4	0.266667	51	0.02321
AQP2	4	0.266667	50	0.0295051
AQP5	4	0.266667	50	0.0295051
AQP6	4	0.266667	50	0.0295051
ARF3	4	0.266667	50	0.0295051
ARHGAP9	4	0.266667	48	0.0461385
ARHGEF25	4	0.266667	48	0.0461385
ASIC1	4	0.266667	50	0.0295051
ATF1	4	0.266667	50	0.0295051
AVIL	4	0.266667	48	0.0461385
AVPR1A	4	0.266667	49	0.0370902
B4GALNT1	4	0.266667	48	0.0461385
BAZ2A	4	0.266667	51	0.02321
BCDIN3D	4	0.266667	50	0.0295051
BIN2	4	0.266667	50	0.0295051
C12orf56	4	0.266667	49	0.0370902
C12orf66	4	0.266667	49	0.0370902
C1QL4	4	0.266667	50	0.0295051
C2CD5	4	0.266667	48	0.0461385
CACNB3	4	0.266667	50	0.0295051
CAPZA3	4	0.266667	49	0.0370902
CBX5	4	0.266667	50	0.0295051
CCDC65	4	0.266667	50	0.0295051
CD63	4	0.266667	50	0.0295051
CDK2	4	0.266667	51	0.02321
CDK4	4	0.266667	48	0.0461385
CELA1	4	0.266667	50	0.0295051
CERS5	4	0.266667	50	0.0295051
CMAS	4	0.266667	49	0.0370902
CNPY2	4	0.266667	51	0.02321
COPZ1	4	0.266667	50	0.0295051
COQ10A	4	0.266667	51	0.02321
COX14	4	0.266667	50	0.0295051
CS	4	0.266667	51	0.02321
CSRNP2	4	0.266667	50	0.0295051
CTDSP2	4	0.266667	48	0.0461385
CYP27B1	4	0.266667	48	0.0461385
DAZAP2	4	0.266667	50	0.0295051
DCD	4	0.266667	50	0.0295051
DCTN2	4	0.266667	48	0.0461385
DDIT3	4	0.266667	48	0.0461385
DDN	4	0.266667	50	0.0295051
DDX23	4	0.266667	50	0.0295051
DERA	4	0.266667	48	0.0461385
DGKA	4	0.266667	51	0.02321
DHH	4	0.266667	50	0.0295051
DIP2B	4	0.266667	50	0.0295051
DNAJC14	4	0.266667	51	0.02321
DNAJC22	4	0.266667	50	0.0295051
DTX3	4	0.266667	48	0.0461385
ERBB3	4	0.266667	51	0.02321
ERGIC2	4	0.266667	50	0.0295051
ESYT1	4	0.266667	51	0.02321
FAIM2	4	0.266667	50	0.0295051
FAM186A	4	0.266667	50	0.0295051
FAM186B	4	0.266667	50	0.0295051
FAR2	4	0.266667	50	0.0295051
FIGNL2	4	0.266667	50	0.0295051
FKBP11	4	0.266667	50	0.0295051
FMNL3	4	0.266667	50	0.0295051
GALNT6	4	0.266667	50	0.0295051
GDF11	4	0.266667	50	0.0295051
GLI1	4	0.266667	48	0.0461385
GNS	4	0.266667	49	0.0370902
GOLT1B	4	0.266667	49	0.0370902
GPD1	4	0.266667	50	0.0295051
GPR182	4	0.266667	50	0.0295051
GRASP	4	0.266667	50	0.0295051
GTSF1	4	0.266667	50	0.0295051
GYS2	4	0.266667	49	0.0370902
HIGD1C	4	0.266667	50	0.0295051
HNRNPA1	4	0.266667	50	0.0295051
HOXC10	4	0.266667	50	0.0295051
HOXC11	4	0.266667	50	0.0295051
HOXC12	4	0.266667	50	0.0295051
HOXC13	4	0.266667	50	0.0295051
HOXC4	4	0.266667	50	0.0295051
HOXC8	4	0.266667	50	0.0295051
HOXC9	4	0.266667	50	0.0295051
HSD17B6	4	0.266667	50	0.0295051
IKZF4	4	0.266667	51	0.02321
IL23A	4	0.266667	51	0.02321
INHBC	4	0.266667	48	0.0461385
INHBE	4	0.266667	48	0.0461385
ITGA7	4	0.266667	50	0.0295051
KCNH3	4	0.266667	50	0.0295051
KCNJ8	4	0.266667	49	0.0370902
KIF5A	4	0.266667	48	0.0461385
KMT2D	4	0.266667	50	0.0295051
KRT6B	4	0.266667	49	0.0370902
KRT6C	4	0.266667	49	0.0370902
KRT7	4	0.266667	49	0.0370902
KRT75	4	0.266667	49	0.0370902
KRT80	4	0.266667	49	0.0370902
KRT82	4	0.266667	49	0.0370902
KRT83	4	0.266667	49	0.0370902
KRT84	4	0.266667	49	0.0370902
KRT85	4	0.266667	49	0.0370902
KRT86	4	0.266667	49	0.0370902
LACRT	4	0.266667	50	0.0295051
LARP4	4	0.266667	50	0.0295051
LDHB	4	0.266667	49	0.0370902
LETMD1	4	0.266667	50	0.0295051
LIMA1	4	0.266667	50	0.0295051
LMBR1L	4	0.266667	50	0.0295051
LMO3	4	0.266667	48	0.0461385
LRIG3	4	0.266667	49	0.0370902
LRP1	4	0.266667	48	0.0461385
MBD6	4	0.266667	48	0.0461385
MCRS1	4	0.266667	50	0.0295051
METTL1	4	0.266667	48	0.0461385
METTL7A	4	0.266667	50	0.0295051
METTL7B	4	0.266667	50	0.0295051
MGST1	4	0.266667	48	0.0461385
MIP	4	0.266667	51	0.02321
MMP19	4	0.266667	51	0.02321
MON2	4	0.266667	49	0.0370902
MUCL1	4	0.266667	50	0.0295051
MYL6	4	0.266667	51	0.02321
MYL6B	4	0.266667	51	0.02321
MYO1A	4	0.266667	50	0.0295051
NAB2	4	0.266667	48	0.0461385
NABP2	4	0.266667	50	0.0295051
NACA	4	0.266667	51	0.02321
NCKAP1L	4	0.266667	50	0.0295051
NCKAP5L	4	0.266667	50	0.0295051
NDUFA4L2	4	0.266667	48	0.0461385
NEUROD4	4	0.266667	50	0.0295051
NFE2	4	0.266667	50	0.0295051
NR4A1	4	0.266667	50	0.0295051
NXPH4	4	0.266667	48	0.0461385
OR10A7	4	0.266667	50	0.0295051
OR10P1	4	0.266667	50	0.0295051
OR2AP1	4	0.266667	50	0.0295051
OR6C1	4	0.266667	50	0.0295051
OR6C2	4	0.266667	50	0.0295051
OR6C3	4	0.266667	50	0.0295051
OR6C4	4	0.266667	50	0.0295051
OR6C6	4	0.266667	50	0.0295051
OR6C65	4	0.266667	50	0.0295051
OR6C68	4	0.266667	50	0.0295051
OR6C70	4	0.266667	50	0.0295051
OR6C74	4	0.266667	50	0.0295051
OR6C75	4	0.266667	50	0.0295051
OR6C76	4	0.266667	50	0.0295051
OR9K2	4	0.266667	50	0.0295051
ORMDL2	4	0.266667	51	0.02321
OS9	4	0.266667	48	0.0461385
PA2G4	4	0.266667	51	0.02321
PAN2	4	0.266667	51	0.02321
PDE1B	4	0.266667	50	0.0295051
PDE3A	4	0.266667	48	0.0461385
PIK3C2G	4	0.266667	49	0.0370902
PIP4K2C	4	0.266667	48	0.0461385
PLCZ1	4	0.266667	49	0.0370902
PLEKHA5	4	0.266667	49	0.0370902
PMEL	4	0.266667	51	0.02321
POU6F1	4	0.266667	50	0.0295051
PPM1H	4	0.266667	49	0.0370902
PPP1R1A	4	0.266667	50	0.0295051
PRIM1	4	0.266667	51	0.02321
PRPF40B	4	0.266667	50	0.0295051
PTGES3	4	0.266667	52	0.0180407
PYROXD1	4	0.266667	49	0.0370902
R3HDM2	4	0.266667	48	0.0461385
RAB5B	4	0.266667	51	0.02321
RACGAP1	4	0.266667	50	0.0295051
RASSF3	4	0.266667	49	0.0370902
RBMS2	4	0.266667	51	0.02321
RDH16	4	0.266667	50	0.0295051
RECQL	4	0.266667	49	0.0370902
RERGL	4	0.266667	49	0.0370902
RHEBL1	4	0.266667	50	0.0295051
RND1	4	0.266667	50	0.0295051
RNF41	4	0.266667	50	0.0295051
RPL41	4	0.266667	51	0.02321
RPS26	4	0.266667	51	0.02321
SARNP	4	0.266667	50	0.0295051
SCN8A	4	0.266667	50	0.0295051
SDR9C7	4	0.266667	50	0.0295051
SHMT2	4	0.266667	48	0.0461385
SLC11A2	4	0.266667	50	0.0295051
SLC16A7	4	0.266667	48	0.0461385
SLC26A10	4	0.266667	48	0.0461385
SLC39A5	4	0.266667	50	0.0295051
SLC4A8	4	0.266667	50	0.0295051
SLCO1A2	4	0.266667	49	0.0370902
SLCO1B1	4	0.266667	48	0.0461385
SLCO1C1	4	0.266667	49	0.0370902
SMAGP	4	0.266667	50	0.0295051
SMARCC2	4	0.266667	50	0.0295051
SMARCD1	4	0.266667	50	0.0295051
SMUG1	4	0.266667	50	0.0295051
SPATS2	4	0.266667	50	0.0295051
SPRYD4	4	0.266667	51	0.02321
SRGAP1	4	0.266667	49	0.0370902
ST8SIA1	4	0.266667	49	0.0370902
STAC3	4	0.266667	48	0.0461385
STAT2	4	0.266667	51	0.02321
STAT6	4	0.266667	48	0.0461385
STRAP	4	0.266667	48	0.0461385
SUOX	4	0.266667	51	0.02321
TAC3	4	0.266667	50	0.0295051
TBK1	4	0.266667	49	0.0370902
TESPA1	4	0.266667	50	0.0295051
TFCP2	4	0.266667	50	0.0295051
TIMELESS	4	0.266667	51	0.02321
TMBIM6	4	0.266667	50	0.0295051
TMPRSS12	4	0.266667	50	0.0295051
TMTC1	4	0.266667	48	0.0461385
TROAP	4	0.266667	50	0.0295051
TSFM	4	0.266667	48	0.0461385
TSPAN31	4	0.266667	48	0.0461385
TUBA1A	4	0.266667	50	0.0295051
TUBA1B	4	0.266667	50	0.0295051
TUBA1C	4	0.266667	50	0.0295051
USP15	4	0.266667	49	0.0370902
WNT1	4	0.266667	50	0.0295051
WNT10B	4	0.266667	50	0.0295051
XPOT	4	0.266667	49	0.0370902
ZBTB39	4	0.266667	50	0.0295051
ZC3H10	4	0.266667	51	0.02321
ALG8	3	0.2	44	0.0342326
ANO1	3	0.2	46	0.0220135
AP3M2	3	0.2	45	0.0275752
ASRGL1	3	0.2	46	0.0220135
ATG2A	3	0.2	47	0.0174066
ATL3	3	0.2	45	0.0275752
B3GAT3	3	0.2	45	0.0275752
BAG4	3	0.2	45	0.0275752
BATF2	3	0.2	46	0.0220135
C11orf95	3	0.2	45	0.0275752
C2CD3	3	0.2	45	0.0275752
CD6	3	0.2	45	0.0275752
CDCA5	3	0.2	46	0.0220135
CHRDL2	3	0.2	45	0.0275752
CHRNA6	3	0.2	47	0.0174066
CHRNB3	3	0.2	46	0.0220135
CLPB	3	0.2	45	0.0275752
CTTN	3	0.2	46	0.0220135
DAGLA	3	0.2	45	0.0275752
DDHD2	3	0.2	45	0.0275752
DGAT2	3	0.2	45	0.0275752
DHCR7	3	0.2	46	0.0220135
DKK4	3	0.2	45	0.0275752
DNAJB13	3	0.2	45	0.0275752
EEF1G	3	0.2	45	0.0275752
EML3	3	0.2	45	0.0275752
FADD	3	0.2	46	0.0220135
FADS1	3	0.2	45	0.0275752
FADS2	3	0.2	46	0.0220135
FAM168A	3	0.2	45	0.0275752
FAM86C1	3	0.2	46	0.0220135
FEN1	3	0.2	45	0.0275752
FNTA	3	0.2	48	0.0136251
FOLR1	3	0.2	46	0.0220135
FOLR2	3	0.2	46	0.0220135
GAB2	3	0.2	47	0.0174066
GANAB	3	0.2	46	0.0220135
GPHA2	3	0.2	46	0.0220135
HGSNAT	3	0.2	49	0.0105507
HOOK3	3	0.2	47	0.0174066
IKBKB	3	0.2	45	0.0275752
IL18BP	3	0.2	46	0.0220135
INPPL1	3	0.2	46	0.0220135
INTS5	3	0.2	46	0.0220135
KAT6A	3	0.2	45	0.0275752
KCNE3	3	0.2	45	0.0275752
KCTD21	3	0.2	45	0.0275752
KRTAP5-10	3	0.2	46	0.0220135
KRTAP5-11	3	0.2	46	0.0220135
KRTAP5-7	3	0.2	46	0.0220135
KRTAP5-8	3	0.2	46	0.0220135
KRTAP5-9	3	0.2	46	0.0220135
LIPT2	3	0.2	45	0.0275752
LRRC10B	3	0.2	46	0.0220135
LRRN4CL	3	0.2	47	0.0174066
LSM1	3	0.2	45	0.0275752
MOGAT2	3	0.2	45	0.0275752
MRGPRD	3	0.2	45	0.0275752
MRGPRF	3	0.2	45	0.0275752
MRPL48	3	0.2	45	0.0275752
MTA2	3	0.2	45	0.0275752
MYRF	3	0.2	45	0.0275752
NAALADL1	3	0.2	46	0.0220135
NADSYN1	3	0.2	46	0.0220135
NEU3	3	0.2	45	0.0275752
NUMA1	3	0.2	46	0.0220135
NXF1	3	0.2	46	0.0220135
OR2AT4	3	0.2	45	0.0275752
OR4A16	3	0.2	45	0.0275752
OR4C15	3	0.2	46	0.0220135
OR5AS1	3	0.2	47	0.0174066
OR5D14	3	0.2	45	0.0275752
OR5D16	3	0.2	46	0.0220135
OR5D18	3	0.2	46	0.0220135
OR5L2	3	0.2	46	0.0220135
OR5W2	3	0.2	46	0.0220135
OR8G1	3	0.2	45	0.0275752
OR8G5	3	0.2	45	0.0275752
OR8I2	3	0.2	47	0.0174066
PHOX2A	3	0.2	46	0.0220135
PLAT	3	0.2	45	0.0275752
POLB	3	0.2	45	0.0275752
POLR2G	3	0.2	46	0.0220135
POMK	3	0.2	48	0.0136251
PPFIA1	3	0.2	46	0.0220135
PPP2R5B	3	0.2	46	0.0220135
PYGM	3	0.2	46	0.0220135
RAB6A	3	0.2	45	0.0275752
RASGRP2	3	0.2	46	0.0220135
RCOR2	3	0.2	45	0.0275752
RELT	3	0.2	45	0.0275752
RNF169	3	0.2	45	0.0275752
RNF170	3	0.2	47	0.0174066
ROM1	3	0.2	45	0.0275752
SAC3D1	3	0.2	46	0.0220135
SCGB1D2	3	0.2	46	0.0220135
SCGB1D4	3	0.2	45	0.0275752
SCGB2A1	3	0.2	46	0.0220135
SCGB2A2	3	0.2	46	0.0220135
SERPINH1	3	0.2	45	0.0275752
SF1	3	0.2	46	0.0220135
SHANK2	3	0.2	46	0.0220135
SLC15A3	3	0.2	45	0.0275752
SLC20A2	3	0.2	45	0.0275752
SLC22A11	3	0.2	45	0.0275752
SLC22A24	3	0.2	46	0.0220135
SLC22A25	3	0.2	46	0.0220135
SMIM19	3	0.2	46	0.0220135
SPCS2	3	0.2	45	0.0275752
SSH3	3	0.2	45	0.0275752
STX5	3	0.2	46	0.0220135
SYT7	3	0.2	46	0.0220135
TAF6L	3	0.2	46	0.0220135
THAP1	3	0.2	47	0.0174066
TMEM179B	3	0.2	46	0.0220135
TMEM223	3	0.2	46	0.0220135
TMEM258	3	0.2	45	0.0275752
TPCN2	3	0.2	45	0.0275752
TUT1	3	0.2	45	0.0275752
UBXN1	3	0.2	47	0.0174066
UCP3	3	0.2	45	0.0275752
USP35	3	0.2	46	0.0220135
UVRAG	3	0.2	46	0.0220135
VDAC3	3	0.2	45	0.0275752
WDR74	3	0.2	47	0.0174066
XRRA1	3	0.2	45	0.0275752
ZBTB3	3	0.2	47	0.0174066
ZFPL1	3	0.2	46	0.0220135

## Sheet: CNV_Variant2_freq>30%,p<0.1
gene	variant2	freq	other	prop4_pvalue
KCNV2	6	0.857143	40	0.0866367
RFX3	6	0.857143	40	0.0866367
VLDLR	6	0.857143	40	0.0866367
AP3B1	4	0.571429	9	0.00317016
ARSB	4	0.571429	9	0.00317016
LHFPL2	4	0.571429	9	0.00317016
PCDH17	4	0.571429	17	0.0586602
SCAMP1	4	0.571429	9	0.00317016
ACOT12	3	0.428571	9	0.0514924
ACSL6	3	0.428571	11	0.0962449
ACTBL2	3	0.428571	11	0.0962449
ADAMTS19	3	0.428571	10	0.072028
ADAMTS6	3	0.428571	10	0.072028
AFF4	3	0.428571	11	0.0962449
AGGF1	3	0.428571	10	0.072028
AK6	3	0.428571	9	0.0514924
ALDH7A1	3	0.428571	10	0.072028
ANKHD1-EIF4EBP3	3	0.428571	11	0.0962449
ANKRA2	3	0.428571	9	0.0514924
ANKRD31	3	0.428571	10	0.072028
ANKRD34B	3	0.428571	9	0.0514924
ANKRD55	3	0.428571	11	0.0962449
AP3S1	3	0.428571	10	0.072028
APC	3	0.428571	10	0.072028
ARHGAP26	3	0.428571	11	0.0962449
ARHGEF28	3	0.428571	9	0.0514924
ARHGEF37	3	0.428571	11	0.0962449
ARL14EPL	3	0.428571	10	0.072028
ARL15	3	0.428571	11	0.0962449
ARRDC3	3	0.428571	9	0.0514924
ARSK	3	0.428571	9	0.0514924
ATG10	3	0.428571	9	0.0514924
ATG12	3	0.428571	10	0.072028
ATP6AP1L	3	0.428571	9	0.0514924
BDP1	3	0.428571	9	0.0514924
BHMT	3	0.428571	9	0.0514924
BHMT2	3	0.428571	9	0.0514924
BTF3	3	0.428571	9	0.0514924
C5orf15	3	0.428571	11	0.0962449
C5orf24	3	0.428571	11	0.0962449
C5orf46	3	0.428571	11	0.0962449
C5orf63	3	0.428571	10	0.072028
CAMK4	3	0.428571	10	0.072028
CAMLG	3	0.428571	11	0.0962449
CARTPT	3	0.428571	9	0.0514924
CAST	3	0.428571	9	0.0514924
CATSPER3	3	0.428571	11	0.0962449
CCDC112	3	0.428571	9	0.0514924
CCDC125	3	0.428571	9	0.0514924
CCNB1	3	0.428571	9	0.0514924
CCNH	3	0.428571	9	0.0514924
CCNI2	3	0.428571	11	0.0962449
CCNO	3	0.428571	11	0.0962449
CD180	3	0.428571	10	0.072028
CDC20B	3	0.428571	11	0.0962449
CDC42SE2	3	0.428571	11	0.0962449
CDK7	3	0.428571	9	0.0514924
CDKL3	3	0.428571	11	0.0962449
CDKN2AIPNL	3	0.428571	11	0.0962449
CDO1	3	0.428571	10	0.072028
CENPH	3	0.428571	9	0.0514924
CENPK	3	0.428571	10	0.072028
CEP120	3	0.428571	10	0.072028
CETN3	3	0.428571	9	0.0514924
CHD1	3	0.428571	9	0.0514924
CHSY3	3	0.428571	10	0.072028
CMYA5	3	0.428571	9	0.0514924
COMMD10	3	0.428571	10	0.072028
COX7C	3	0.428571	9	0.0514924
CRHBP	3	0.428571	10	0.072028
CSNK1G3	3	0.428571	10	0.072028
CTXN3	3	0.428571	10	0.072028
CWC27	3	0.428571	10	0.072028
CXCL14	3	0.428571	11	0.0962449
CXXC5	3	0.428571	11	0.0962449
CYSTM1	3	0.428571	11	0.0962449
DCP2	3	0.428571	9	0.0514924
DDX4	3	0.428571	11	0.0962449
DDX46	3	0.428571	11	0.0962449
DEPDC1B	3	0.428571	10	0.072028
DHFR	3	0.428571	9	0.0514924
DHX29	3	0.428571	11	0.0962449
DIAPH1	3	0.428571	11	0.0962449
DIMT1	3	0.428571	10	0.072028
DMGDH	3	0.428571	9	0.0514924
DMXL1	3	0.428571	10	0.072028
DPYSL3	3	0.428571	11	0.0962449
DTWD2	3	0.428571	10	0.072028
EDIL3	3	0.428571	9	0.0514924
EFNA5	3	0.428571	10	0.072028
ELL2	3	0.428571	9	0.0514924
ELOVL7	3	0.428571	10	0.072028
ENC1	3	0.428571	9	0.0514924
EPB41L4A	3	0.428571	10	0.072028
ERAP1	3	0.428571	9	0.0514924
ERAP2	3	0.428571	9	0.0514924
ESM1	3	0.428571	11	0.0962449
F2R	3	0.428571	10	0.072028
F2RL1	3	0.428571	10	0.072028
FAM151B	3	0.428571	9	0.0514924
FAM169A	3	0.428571	9	0.0514924
FAM170A	3	0.428571	10	0.072028
FAM172A	3	0.428571	9	0.0514924
FAM174A	3	0.428571	9	0.0514924
FAM81B	3	0.428571	9	0.0514924
FBN2	3	0.428571	10	0.072028
FBXL17	3	0.428571	10	0.072028
FCHO2	3	0.428571	9	0.0514924
FEM1C	3	0.428571	9	0.0514924
FER	3	0.428571	10	0.072028
FGF1	3	0.428571	11	0.0962449
FNIP1	3	0.428571	11	0.0962449
FOXD1	3	0.428571	9	0.0514924
FST	3	0.428571	11	0.0962449
FSTL4	3	0.428571	11	0.0962449
FTMT	3	0.428571	10	0.072028
GAPT	3	0.428571	10	0.072028
GDF9	3	0.428571	11	0.0962449
GFM2	3	0.428571	9	0.0514924
GIN1	3	0.428571	10	0.072028
GLRX	3	0.428571	9	0.0514924
GNPDA1	3	0.428571	11	0.0962449
GPBP1	3	0.428571	11	0.0962449
GPR150	3	0.428571	9	0.0514924
GPR151	3	0.428571	11	0.0962449
GRXCR2	3	0.428571	11	0.0962449
GZMA	3	0.428571	11	0.0962449
GZMK	3	0.428571	11	0.0962449
HAPLN1	3	0.428571	9	0.0514924
HBEGF	3	0.428571	11	0.0962449
HDAC3	3	0.428571	11	0.0962449
HEXB	3	0.428571	9	0.0514924
HINT1	3	0.428571	10	0.072028
HMGCR	3	0.428571	10	0.072028
HMHB1	3	0.428571	11	0.0962449
HOMER1	3	0.428571	9	0.0514924
HSD17B4	3	0.428571	10	0.072028
HSPA4	3	0.428571	11	0.0962449
HSPB3	3	0.428571	11	0.0962449
HTR1A	3	0.428571	11	0.0962449
IGIP	3	0.428571	11	0.0962449
IL13	3	0.428571	11	0.0962449
IL31RA	3	0.428571	11	0.0962449
IL4	3	0.428571	11	0.0962449
IL5	3	0.428571	11	0.0962449
IL6ST	3	0.428571	11	0.0962449
IL9	3	0.428571	11	0.0962449
IQGAP2	3	0.428571	10	0.072028
IRF1	3	0.428571	11	0.0962449
ISOC1	3	0.428571	10	0.072028
JADE2	3	0.428571	11	0.0962449
JAKMIP2	3	0.428571	11	0.0962449
JMY	3	0.428571	9	0.0514924
KCNN2	3	0.428571	9	0.0514924
KCTD16	3	0.428571	11	0.0962449
KIAA0825	3	0.428571	9	0.0514924
KIF2A	3	0.428571	10	0.072028
KIF3A	3	0.428571	11	0.0962449
LEAP2	3	0.428571	11	0.0962449
LECT2	3	0.428571	11	0.0962449
LIX1	3	0.428571	9	0.0514924
LMNB1	3	0.428571	10	0.072028
LNPEP	3	0.428571	9	0.0514924
LOX	3	0.428571	10	0.072028
LYRM7	3	0.428571	11	0.0962449
LYSMD3	3	0.428571	9	0.0514924
MAN2A1	3	0.428571	10	0.072028
MAP1B	3	0.428571	9	0.0514924
MAP3K1	3	0.428571	11	0.0962449
MARVELD2	3	0.428571	9	0.0514924
MAST4	3	0.428571	10	0.072028
MBLAC2	3	0.428571	9	0.0514924
MCC	3	0.428571	9	0.0514924
MCCC2	3	0.428571	9	0.0514924
MCIDAS	3	0.428571	11	0.0962449
MCTP1	3	0.428571	9	0.0514924
MEF2C	3	0.428571	9	0.0514924
MEGF10	3	0.428571	10	0.072028
MIER3	3	0.428571	11	0.0962449
MRPS27	3	0.428571	9	0.0514924
MRPS36	3	0.428571	9	0.0514924
MSH3	3	0.428571	9	0.0514924
MTX3	3	0.428571	9	0.0514924
NAIP	3	0.428571	10	0.072028
NDFIP1	3	0.428571	11	0.0962449
NDUFAF2	3	0.428571	10	0.072028
NDUFS4	3	0.428571	11	0.0962449
NEUROG1	3	0.428571	11	0.0962449
NLN	3	0.428571	10	0.072028
NR2F1	3	0.428571	9	0.0514924
NR3C1	3	0.428571	11	0.0962449
NREP	3	0.428571	10	0.072028
NRG2	3	0.428571	11	0.0962449
NSA2	3	0.428571	9	0.0514924
NUDT12	3	0.428571	10	0.072028
OCLN	3	0.428571	9	0.0514924
OTP	3	0.428571	10	0.072028
PAM	3	0.428571	10	0.072028
PCBD2	3	0.428571	11	0.0962449
PCDH12	3	0.428571	11	0.0962449
PDE4D	3	0.428571	10	0.072028
PDE8B	3	0.428571	10	0.072028
PFDN1	3	0.428571	11	0.0962449
PGGT1B	3	0.428571	9	0.0514924
PHAX	3	0.428571	10	0.072028
PIK3R1	3	0.428571	10	0.072028
PITX1	3	0.428571	11	0.0962449
PLAC8L1	3	0.428571	11	0.0962449
PLK2	3	0.428571	10	0.072028
POLK	3	0.428571	10	0.072028
POLR3G	3	0.428571	9	0.0514924
POU4F3	3	0.428571	11	0.0962449
PPIC	3	0.428571	10	0.072028
PPIP5K2	3	0.428571	10	0.072028
PPP2CA	3	0.428571	11	0.0962449
PPP2R2B	3	0.428571	11	0.0962449
PPWD1	3	0.428571	10	0.072028
PRDM6	3	0.428571	10	0.072028
PRELID2	3	0.428571	11	0.0962449
PRR16	3	0.428571	10	0.072028
PRRC1	3	0.428571	10	0.072028
PSD2	3	0.428571	11	0.0962449
PTCD2	3	0.428571	9	0.0514924
PURA	3	0.428571	11	0.0962449
RAB3C	3	0.428571	10	0.072028
RAD17	3	0.428571	9	0.0514924
RAD50	3	0.428571	11	0.0962449
RAPGEF6	3	0.428571	11	0.0962449
RASA1	3	0.428571	9	0.0514924
RASGRF2	3	0.428571	9	0.0514924
RBM27	3	0.428571	11	0.0962449
REEP5	3	0.428571	9	0.0514924
RGMB	3	0.428571	9	0.0514924
RGS7BP	3	0.428571	10	0.072028
RHOBTB3	3	0.428571	9	0.0514924
RIOK2	3	0.428571	9	0.0514924
RNF14	3	0.428571	11	0.0962449
RNF180	3	0.428571	10	0.072028
RPS23	3	0.428571	9	0.0514924
S100Z	3	0.428571	10	0.072028
SAR1B	3	0.428571	11	0.0962449
SCGB3A2	3	0.428571	11	0.0962449
SEC24A	3	0.428571	11	0.0962449
SEMA6A	3	0.428571	10	0.072028
SERINC5	3	0.428571	9	0.0514924
SETD9	3	0.428571	11	0.0962449
SGTB	3	0.428571	10	0.072028
SH3RF2	3	0.428571	11	0.0962449
SHROOM1	3	0.428571	11	0.0962449
SKP1	3	0.428571	11	0.0962449
SLC12A2	3	0.428571	10	0.072028
SLC25A46	3	0.428571	10	0.072028
SLC25A48	3	0.428571	11	0.0962449
SLC27A6	3	0.428571	10	0.072028
SLC30A5	3	0.428571	9	0.0514924
SLC38A9	3	0.428571	11	0.0962449
SLC4A9	3	0.428571	11	0.0962449
SLCO4C1	3	0.428571	10	0.072028
SLCO6A1	3	0.428571	10	0.072028
SMAD5	3	0.428571	11	0.0962449
SMIM15	3	0.428571	10	0.072028
SNCAIP	3	0.428571	10	0.072028
SNX2	3	0.428571	10	0.072028
SNX24	3	0.428571	10	0.072028
SOWAHA	3	0.428571	11	0.0962449
SPATA9	3	0.428571	9	0.0514924
SPINK1	3	0.428571	11	0.0962449
SPINK14	3	0.428571	11	0.0962449
SPINK5	3	0.428571	11	0.0962449
SPINK6	3	0.428571	11	0.0962449
SPRY4	3	0.428571	11	0.0962449
SPZ1	3	0.428571	9	0.0514924
SREK1	3	0.428571	10	0.072028
SREK1IP1	3	0.428571	10	0.072028
SRFBP1	3	0.428571	10	0.072028
SRP19	3	0.428571	9	0.0514924
SSBP2	3	0.428571	9	0.0514924
ST8SIA4	3	0.428571	9	0.0514924
STARD4	3	0.428571	10	0.072028
STK32A	3	0.428571	11	0.0962449
SV2C	3	0.428571	10	0.072028
TBCA	3	0.428571	10	0.072028
TCERG1	3	0.428571	11	0.0962449
TCF7	3	0.428571	11	0.0962449
TGFBI	3	0.428571	11	0.0962449
THBS4	3	0.428571	9	0.0514924
TIFAB	3	0.428571	11	0.0962449
TMEM161B	3	0.428571	9	0.0514924
TMEM167A	3	0.428571	9	0.0514924
TMEM171	3	0.428571	10	0.072028
TMEM174	3	0.428571	10	0.072028
TMEM232	3	0.428571	10	0.072028
TNFAIP8	3	0.428571	10	0.072028
TNPO1	3	0.428571	9	0.0514924
TRAPPC13	3	0.428571	10	0.072028
TRIM23	3	0.428571	10	0.072028
TRIM36	3	0.428571	9	0.0514924
TRPC7	3	0.428571	11	0.0962449
TSLP	3	0.428571	10	0.072028
TTC37	3	0.428571	9	0.0514924
TXNDC15	3	0.428571	11	0.0962449
UBE2B	3	0.428571	11	0.0962449
UQCRQ	3	0.428571	11	0.0962449
UTP15	3	0.428571	9	0.0514924
VCAN	3	0.428571	9	0.0514924
VDAC1	3	0.428571	11	0.0962449
WDR36	3	0.428571	10	0.072028
WDR41	3	0.428571	10	0.072028
XRCC4	3	0.428571	9	0.0514924
YIPF5	3	0.428571	11	0.0962449
YTHDC2	3	0.428571	9	0.0514924
ZBED3	3	0.428571	10	0.072028
ZCCHC10	3	0.428571	11	0.0962449
ZCCHC9	3	0.428571	9	0.0514924
ZFYVE16	3	0.428571	9	0.0514924
ZNF366	3	0.428571	9	0.0514924
ZNF474	3	0.428571	10	0.072028
ZNF608	3	0.428571	10	0.072028
ZSWIM6	3	0.428571	10	0.072028

## Sheet: POU2F3_Immunohistochemistry sco
ID	Mean	RECIST
1312950	185(4)	PR
1279785	158(6)	PR
1072298	153(6)	SD-
1271227	150(10)	PR
1303492	150(9)	SD-
1374741	144(10)	PR
1384948	134(10)	PR
1319133	133(10)	PR
1171882	118(10)	SD-
1202472	110(8)	SD-
1194986	110(2)	SD-
1164180	104(10)	PR
1212086	99(10)	SD-
1261226	97(3)	SD+
1254084	96(9)	PR
1043229	90(9)	PR
1108463/C0207400	90(7)	PR
1170595	85(2)	SD+
1084119	82(10)	PR
1191392	69(10)	PR
1188462	68(5)	PD
1156463	67(3)	PD
1154922	66(9)	PD
1084754	64(10)	SD
1283774	60(3)	PR→CR
1274606	60(1)	SD+
1312102	48(10)	PR
1124376	38(10)	SD
