# Supplementary material for: Integrative analysis of multi-omics data reveals the heterogeneity and signatures of immune therapy for small cell lung cancer
Source: Research Square preprint supplement (doi:10.21203/rs.3.rs-148857/v1), 2021-01-22
Supplement: Supplementary file 5 [file c54200a1dc30e2d7b64d80f6.xlsx]

## Sheet: Sheet1
sample	LRMP	SLC7A14	ANXA1	POU2F3	C4orf19	DDC	ZHX2	SYP	HS3ST6	MAP2	TGIF2	ANXA3	PLEKHG7	VSNL1	REST	NRXN1	CDKN2C	EFNA4	RGS13	ZDHHC22	CPE	ASCL1	GFI1B	SMPD3	MGAT4C	RIMKLA	AJUBA	CDC42EP1	PCSK1	HSBP1L1	DPF1	SPTSSA	DTX4	RASSF2	SEZ6L	RGS7	TMEM63C	ACTL6B	GNAO1	UNC79	KIAA2022	CACNA1A	INSM1	PVRL4	ATL1	ELAVL4	TRIM9	ZIC5	KCNK16
X1274LC	7.88041	0.0641877	10.0356	8.00922	2.86582	1.81056	2.43524	4.26601	-0.174107	3.35202	4.30001	2.45522	2.80529	0.777779	2.98433	0.712316	3.72306	2.91692	6.88166	0.0412801	3.27729	1.37035	5.16643	1.08066	0.401418	1.02665	2.46146	3.28506	0.535057	4.97182	1.08593	4.17924	1.85969	1.9993	0.496498	0.360579	1.32372	3.94835	1.92419	0.108581	0.484588	-0.0557848	3.8353	2.23883	2.75109	0.332282	0.955279	0.343346	0.131563
t134430	5.89892	-0.158562	8.88195	6.27509	1.19722	0.21158	5.29386	2.07052	0.240187	1.22261	4.19528	2.60444	1.06317	2.9165	2.99982	0.529613	4.68649	3.44057	4.12521	0.354235	3.26529	0.737863	3.26272	0.536886	-0.108596	1.77967	2.15388	4.19045	-0.074308	3.21021	1.30906	3.93798	2.90417	4.52419	0.0168457	-0.190702	1.03246	0.112286	1.56482	0.147909	0.585668	2.53507	3.86698	2.56722	2.49483	-0.247098	1.9146	1.70084	0.0120565
t585210	5.97074	-0.158562	10.9901	4.29553	3.18868	-0.140041	2.47627	0.168731	0.240187	2.1961	4.97891	5.17289	2.46057	5.88301	2.66034	-0.220025	3.15302	4.45681	5.99916	-0.0529997	1.5901	0.0957032	1.24055	0.216613	-0.0476575	0.176542	1.24295	3.3273	-0.0996391	4.65627	-0.134518	4.75855	2.2998	4.05395	-0.0490026	-0.240216	-0.271724	0.112286	-0.126612	0.130585	-0.321949	-0.183977	1.56676	1.9451	1.45342	-0.190388	-0.149302	-0.295292	0.0120565
t585272	6.64857	-0.107424	9.93983	5.91828	2.72645	0.343182	3.55362	3.60363	0.240187	4.46042	4.70939	3.86872	0.49381	2.2614	2.37495	0.315786	4.6945	4.2085	5.70569	-0.0529997	4.06422	3.73587	5.10684	2.83062	-0.108596	1.05082	2.35991	4.37735	0.811017	4.01089	1.0789	3.97326	2.73019	3.1415	-0.0477917	0.142209	0.0617472	0.191916	1.51554	0.328165	0.519005	1.6902	4.87417	2.69564	2.66389	-0.21275	0.784798	-0.268195	0.0120565
t585205	4.49357	-0.103446	7.36288	6.36546	1.07029	0.408283	4.48145	1.23644	0.240187	3.41414	4.83491	2.8809	1.745	4.69167	3.36444	2.43484	5.29097	4.55194	1.4149	-0.0254556	4.60118	0.0598929	3.52505	0.77143	-0.108596	1.51081	1.43035	4.89353	0.806678	4.46566	0.189369	3.44013	2.382	5.00253	-0.0448529	-0.0223438	0.740591	0.278161	0.579492	0.144118	0.214765	0.446645	5.08006	2.18636	2.50254	1.44527	0.544651	-0.321208	0.0120565
t585223	7.17959	-0.0426478	10.5673	5.7238	2.46671	0.859185	3.2343	3.01574	0.240187	2.39697	4.43516	3.25888	2.45657	4.6512	2.54978	0.29452	4.93063	4.26715	1.41915	1.54316	4.08662	0.725535	4.51497	1.80758	0.101925	1.37195	2.3473	5.03816	0.495237	5.30928	0.432029	4.05912	3.54478	5.99426	-0.0720757	-0.240216	2.21011	0.92734	1.65163	0.143969	0.237319	0.188641	5.84561	2.65463	2.05807	-0.208501	1.24446	1.75342	0.0120565
t113368	3.94221	0.54751	8.28501	5.26017	2.8375	2.07157	4.67174	3.56397	0.240187	3.85919	3.95572	4.08684	0.833759	2.7101	3.8188	1.43832	5.28885	4.88399	2.88354	0.41942	4.75096	0.745178	3.68574	1.07636	-0.0474848	1.40087	2.41075	3.87008	0.690247	3.2864	1.09607	4.39514	2.82767	3.80228	0.0145347	-0.240216	0.055973	1.79682	0.862486	0.383003	0.652176	1.34132	4.96552	2.42141	3.64694	2.95721	0.381482	-0.111256	0.0120565
S00829	2.25835	0.069277	11.4419	5.62436	1.75788	2.85685	3.95296	2.79024	0.322999	2.49939	5.40514	4.04698	1.84843	3.56743	3.64525	2.60852	5.01981	5.28458	4.09008	0.287769	4.36144	4.7877	3.43137	1.20739	0.0416394	2.64054	2.5359	3.25492	0.350043	3.40959	2.74411	4.39428	2.63467	3.47614	0.110824	0.168947	1.08739	0.490641	0.56601	-0.00427626	0.246128	1.33723	4.95479	2.04106	3.47879	2.71326	1.47511	0.268677	0.138165
S00837	6.67636	0.0746878	9.57889	6.18938	2.6732	0.874253	3.70292	1.41327	-0.0719782	1.0015	4.32304	3.8977	3.03028	1.47251	3.11496	0.36742	5.32715	3.08273	2.11848	0.13973	3.13131	2.99621	5.7344	1.03053	0.0786049	1.58497	2.34551	5.96428	0.739688	3.83574	0.854239	4.50582	5.0876	5.92771	0.495653	0.249158	0.574824	0.33082	0.915289	-0.0285246	0.253213	0.897096	2.0975	2.713	1.91258	0.338966	0.47365	0.248212	0.00616533
S01556	9.04942	0.968594	10.9657	6.77287	3.31134	0.563627	2.33195	4.23471	-0.0719782	4.12583	3.58836	2.41212	0.175957	3.75386	1.4386	1.40949	5.68553	2.15866	9.1677	1.60531	5.99655	0.14023	4.70381	1.60719	0.25204	1.53893	1.86374	3.61038	0.545282	4.2461	0.911184	4.77507	1.29129	1.92004	0.297829	0.0713429	1.34492	2.1532	0.902956	1.73108	0.334694	0.337792	6.46296	0.394499	3.97891	2.14268	2.40326	0.372001	-0.0275525
S02255	6.297	0.716512	10.07	6.3542	3.07947	3.46448	3.20403	4.27394	-0.0719782	2.84194	3.90712	2.12209	1.26806	2.04717	2.09439	0.751354	4.28105	2.05619	3.51592	0.126689	5.45824	0.277735	1.03817	0.799756	0.0416394	0.905429	0.972517	3.9138	0.362504	5.22007	1.07869	4.05325	1.54093	2.34741	0.068789	0.148039	1.02419	1.14053	2.95447	1.09943	0.169555	0.392065	4.36819	0.542905	2.03534	1.01943	0.349219	0.562378	-0.0275525
S02256	7.12826	0.66742	5.53185	6.81595	1.6677	0.561588	2.70529	5.08328	-0.0719782	3.23793	4.45519	4.23385	0.22905	2.71662	1.3759	1.0041	4.83098	2.18428	8.04837	0.137555	4.85959	0.424065	5.76122	1.77382	0.293973	2.20336	1.44287	4.62441	2.63277	5.09798	0.680819	4.16507	1.72606	2.91739	2.42599	3.03244	1.7906	5.02005	4.31131	1.61977	0.945131	0.835898	4.78646	0.782821	3.88318	1.36107	2.34695	0.291391	-0.00611396
S02286	2.07882	0.0742896	7.82462	5.5442	2.6145	0.267157	4.11199	1.76365	-0.0719782	2.96596	4.98212	4.11089	2.50273	4.41496	3.16087	0.45989	3.62957	4.67932	0.363313	0.0717417	3.47922	0.392145	2.66197	0.922369	0.0416394	1.01835	2.60386	4.74963	0.194141	3.62617	0.345987	3.65505	3.86975	4.15958	0.0997037	0.107307	0.456079	0.29061	0.585917	-0.0874723	0.154285	2.8461	2.68357	3.87417	1.98417	0.173838	0.337855	0.346011	0.061582
S02288	2.88473	0.0887694	8.75079	4.93931	2.17152	0.194729	3.7764	2.04783	-0.0719782	3.57738	4.46581	2.93217	1.38286	4.47513	3.21225	0.417115	4.57573	4.62929	0.697042	0.0850734	4.18989	2.43384	3.00393	1.7253	0.0416394	1.66785	2.43972	3.86559	0.226376	3.13949	1.7098	3.79119	2.4711	3.64472	0.105476	0.0974992	0.219882	0.231476	0.715669	-0.055119	0.220289	0.528283	3.91588	3.51073	2.58606	0.189266	0.817453	0.522893	0.0396369
S02296	5.42593	0.0847591	10.857	5.39648	1.93644	0.797429	4.91101	2.70837	-0.0193939	2.74589	5.56105	3.82274	1.57003	1.95299	2.89133	0.642196	4.20597	5.61845	1.61543	0.0580702	2.50357	0.159357	4.3126	1.1761	0.05691	1.15817	2.87533	4.44981	0.310825	3.02253	1.9345	3.88838	2.66687	3.23251	0.0943255	0.0836544	0.194309	0.208682	0.526525	-0.0916381	0.163649	2.16699	4.28628	2.37485	2.75246	1.23408	0.403489	0.267798	0.000645696
S02375	4.79336	0.31134	9.34023	4.75629	1.93401	0.743843	4.00516	2.58477	0.0299517	3.0969	4.55925	3.48445	1.64594	5.67477	2.66996	1.72962	5.21724	3.87356	5.84653	0.314849	4.26748	1.50527	3.96902	1.59092	0.129969	1.61639	1.42278	5.43737	1.79941	4.94997	0.829208	4.62855	3.16689	6.3435	1.81145	0.211185	0.567406	2.3354	1.75733	0.856975	0.633683	1.5607	4.92636	3.10856	3.21233	2.16851	0.869808	2.27781	0.0059912
X1520LC	2.49048	0.0347668	6.42771	1.37726	2.40497	1.98566	3.49708	3.32856	0.0221116	4.0453	3.88905	3.85292	0.300981	0.891305	2.99142	1.11483	5.09923	3.29206	0.917534	0.0789582	4.8719	6.98306	0.493281	2.5265	0.526439	2.9795	1.93548	3.99728	1.10049	3.58038	0.326182	4.28745	3.14078	3.85247	1.59528	0.984597	1.06589	2.55182	2.71566	0.498049	0.291835	1.22193	5.32451	3.22614	2.57073	2.10513	1.4335	3.10445	0.0692048
X320LC	1.85217	2.20373	5.97124	1.29145	1.51253	5.68256	2.74513	5.23196	0.1941	4.01648	2.28749	3.52446	0.403301	1.46883	2.24108	2.37047	5.24879	1.62479	0.549055	1.00883	6.51336	8.42488	-0.0387964	3.17992	0.600315	3.97508	1.55272	4.82718	5.41063	3.36693	1.54381	4.93519	2.58452	3.11714	3.71126	1.29214	1.60518	3.3723	2.84129	0.779275	1.29291	4.70221	5.38025	1.80354	2.55302	2.59684	3.30639	1.79339	4.12049
X424LC	2.46549	0.361962	6.33034	2.63707	1.45628	1.5255	2.87394	2.27574	0.614635	3.93644	4.06953	3.85451	0.403959	1.92787	2.64927	1.86244	4.21017	3.51528	0.481261	0.923625	5.07276	6.49082	0.20297	1.031	0.103227	2.98922	1.91991	3.31405	1.50606	3.08121	0.94973	3.5094	3.22926	2.32571	0.341304	0.243532	1.1987	0.165578	2.79528	0.637184	0.353281	2.62085	5.97412	2.89448	3.08574	2.39223	2.0558	1.56882	0.0692048
S00825	2.737	0.397664	6.73142	0.320164	0.39324	6.3838	2.6119	4.27186	0.337709	4.68182	2.51918	3.99297	0.122458	0.573703	2.00466	2.52535	7.20709	2.52102	0.880208	1.74724	7.69089	8.17822	0.131422	3.9297	0.751211	2.93332	1.22774	3.43633	4.57317	2.78429	1.15246	5.20742	1.71579	3.69051	3.94941	2.22007	2.08421	3.58173	2.94298	1.31378	1.31457	4.31419	6.52833	1.76271	3.43007	2.38473	3.56746	2.99799	1.1989
S01563	1.80965	0.810677	5.87789	0.852566	0.501396	5.58864	3.14729	3.93851	0.427381	4.22872	2.88404	3.77096	0.108341	0.902768	1.90143	2.20835	6.68848	3.44138	0.550416	2.05292	7.03389	7.47896	0.216462	4.73935	0.674251	3.76838	1.61104	3.69068	3.58837	2.70555	1.98557	4.7493	2.79062	3.129	4.38159	2.35415	1.96244	4.21347	4.16559	1.10085	1.14995	4.65029	6.64484	2.45795	3.25454	3.50468	3.04405	2.4738	0.0126159
S02093	3.49457	1.20436	6.69785	1.27393	1.56279	3.17871	3.15873	3.45733	0.422614	4.51139	2.97274	2.64648	0.496242	0.824199	2.47293	2.36722	6.03231	2.47161	1.18273	1.50104	6.20314	6.28882	0.146719	3.30561	0.363551	1.92312	1.03467	3.76453	3.5159	2.54978	1.18521	4.57063	2.23899	3.63027	4.62258	0.911558	2.13478	2.84978	2.32446	0.605213	0.987952	3.34629	5.58928	1.69963	2.80025	1.47218	2.39559	2.62304	1.09118
S02249	2.14577	0.841209	6.08539	0.715729	1.12409	4.70385	2.41421	4.61734	0.0856561	4.63426	2.39099	3.04911	0.166675	0.418194	1.86042	1.57855	6.22599	2.54377	0.466161	1.08023	6.79254	7.89443	0.0896467	3.30572	0.407063	2.20669	1.1936	3.83231	3.4586	3.1814	2.44763	4.94779	1.95063	2.56099	1.52692	1.74822	1.25966	3.92062	3.09449	0.90325	0.976291	3.28599	6.95476	1.48805	3.59772	3.12671	3.87567	2.83397	1.2059
S02299	3.25974	0.276456	5.4176	1.93845	1.14353	1.90795	3.24363	2.80998	0.136697	3.03355	3.14706	3.07382	0.60368	0.448199	2.39902	1.27863	5.532	2.5421	1.22927	0.825195	6.63932	5.94986	0.126333	1.99363	0.238645	1.68765	1.41166	3.00018	2.47991	2.8855	0.211598	4.2582	2.25833	3.39217	3.82243	0.811464	1.19346	0.535681	2.69854	0.661362	0.290798	2.33703	4.64529	1.25323	2.48139	1.29163	1.67405	2.62358	0.286889
S02328	3.38181	0.571492	7.3798	1.05561	1.99145	1.15962	3.14689	3.26019	0.0847525	3.54778	3.96827	4.8561	0.408053	1.40136	3.05967	1.65608	5.53765	3.7061	1.24025	0.389217	4.64565	4.54892	0.122203	1.90065	0.299447	2.53647	2.14635	3.18957	2.70118	3.61476	1.06995	4.67416	2.59073	4.07783	3.04896	0.157287	0.956115	1.01689	2.33121	0.342887	0.538126	1.0213	5.86772	1.97626	3.01163	3.96219	1.09128	1.32648	0.00166646
X1272LC	0.794817	1.41029	5.28527	0.227067	-0.14794	7.81142	1.31067	5.47405	2.20998	4.69554	0.859532	1.42995	0.122302	0.0582199	0.720482	3.09594	7.61492	1.08685	0.329453	1.27232	9.16425	8.5591	-0.0387964	3.7899	3.13182	4.45098	0.138744	1.84143	6.33283	2.75849	2.24526	6.50687	0.766429	0.916762	3.02394	4.18336	2.75572	5.12511	3.06692	1.90789	1.89513	4.8627	5.73972	0.503569	4.83471	4.84463	4.32621	2.03447	0.0692048
X395LC	1.01005	2.56471	4.59643	0.772921	0.603331	5.63593	1.61328	6.21005	0.647467	5.96101	1.40635	2.76553	0.0959741	0.542281	0.981634	4.38645	8.15959	1.21125	0.0569134	2.64164	6.27254	7.98447	-0.0387964	3.93111	1.47193	3.28097	0.715885	1.73196	4.43397	2.26028	2.6106	4.6963	1.35414	2.14783	5.78723	2.21277	2.88703	4.77831	3.87453	1.97778	1.68511	6.19431	7.47046	0.616146	3.47975	3.29756	3.9446	4.70125	0.73951
X409LC	1.13252	2.25833	4.83628	0.256585	-0.14794	8.75102	2.34338	5.31521	1.23178	5.7709	1.84942	-0.188879	0.0439214	0.0171296	1.11801	4.1791	7.07571	1.30335	0.194568	4.03043	8.4691	8.9369	-0.0387964	5.12085	0.270337	3.8442	0.385565	3.55488	5.27998	1.10603	3.17344	4.87078	1.36865	2.31661	5.4858	2.74602	2.94876	4.9053	5.68484	2.4951	1.72053	6.28751	8.05088	0.165462	4.13967	4.21376	4.73051	3.49077	3.72211
X539LC	2.93214	0.263268	6.3522	0.343603	0.505413	7.10804	2.23	4.55182	3.02339	5.52961	2.39468	2.59751	0.17232	0.718325	1.68452	1.80427	6.77177	2.214	1.13177	0.124733	8.2525	9.24361	-0.0387964	4.44389	2.42989	3.45793	0.578174	3.55764	5.88702	2.72605	1.38789	5.48763	1.50722	2.9797	5.06794	1.43917	0.635197	4.16822	4.01827	0.633105	0.744468	3.26098	5.73127	0.874372	3.8263	3.35255	2.78422	3.04614	3.6104
X585LC	1.38408	2.93192	5.2427	0.564638	1.3722	6.085	1.85706	5.81055	1.26207	4.54526	1.79563	1.88929	0.22531	-0.174795	2.35894	2.71947	6.44369	1.93783	0.510638	3.4387	6.03227	7.66637	-0.0387964	4.91939	0.301861	4.76929	1.0939	3.06199	4.46928	3.03174	4.38927	4.41203	2.18025	2.47264	2.28844	3.40895	4.49587	2.87047	3.04173	2.57479	1.47266	5.33771	5.36046	1.7159	2.68965	2.09288	2.12793	4.89247	2.51617
X676LC	0.61782	2.92835	3.79737	0.0900035	0.134415	7.35306	1.83594	5.15769	2.57346	5.40406	1.3447	0.318953	0.132232	0.0789025	0.338465	3.02048	6.39868	0.697932	0.234854	3.4893	5.75873	8.73229	-0.0387964	4.98806	0.685203	4.23369	0.475248	1.59568	5.34414	2.2573	3.48188	5.2221	1.42356	1.39585	6.2971	2.81933	3.51706	5.68247	4.78709	2.07745	1.51326	5.4052	7.46035	0.265039	4.79551	5.14614	2.39624	5.48902	4.1813
t134427	0.989737	2.62584	5.12278	-0.0463868	0.465782	6.56557	2.52947	5.79215	0.592521	5.71761	2.4618	2.12005	0.0634356	0.267159	1.57222	2.85326	6.52796	2.27903	-0.0324736	3.24555	7.19993	8.87903	-0.160154	4.40942	0.666919	3.89079	0.919455	3.39646	5.87932	2.1975	2.71126	4.93267	1.80185	2.79396	5.44904	3.6908	3.13492	4.85637	4.64871	1.8752	3.42923	5.72174	6.27123	1.0897	3.84654	3.03019	5.43158	4.21381	1.78225
t585270	0.390728	2.87702	2.85534	0.219419	0.186412	7.4424	2.28111	3.22843	0.519095	6.0821	1.59424	2.662	-0.0530963	0.0184575	1.06567	4.43681	8.72729	3.3214	-0.316346	3.54919	7.70871	5.67143	-0.0431159	1.42187	1.61459	3.92666	0.331944	1.0704	5.57921	2.90041	0.95331	7.08608	0.335957	0.805172	5.1628	2.97609	2.16694	6.08733	1.4708	0.421134	-0.110396	1.09614	5.48282	0.474862	5.55759	4.45353	3.01787	4.1122	5.57135
t585258	0.393907	2.68939	3.03072	-0.113012	-0.0404223	7.0653	2.31914	5.46465	0.420976	5.98063	1.71618	-0.130249	-0.0530963	0.18709	0.530464	3.12994	7.59068	0.235042	-0.214985	3.31665	7.06919	8.70129	-0.160154	4.41961	1.47268	3.56176	0.946094	1.66024	6.73802	1.22363	3.22129	4.98955	0.863973	1.32035	6.5486	4.00779	3.82021	4.63569	5.09707	1.76699	2.08761	3.8683	7.6512	-0.0932153	4.68439	4.8916	1.01089	5.41784	0.759684
t585260	0.914036	2.7425	5.27139	-0.23665	1.46874	8.64849	1.56002	5.97372	1.52199	4.52198	1.3778	1.68022	-0.0530963	0.257476	1.02584	3.57254	5.46057	1.42776	-0.162519	1.74265	9.6495	9.98754	-0.160154	4.85428	3.43498	5.07179	0.503453	2.62196	2.93539	2.08009	3.32137	6.58453	1.36352	2.1408	4.90385	3.09349	2.37617	5.60617	4.08091	1.35225	0.966291	3.32932	6.91439	0.222051	3.73992	3.65153	3.43163	1.39889	1.48457
t585267	1.25209	4.28318	3.50156	0.309693	2.44572	5.61058	1.51094	6.0071	1.2285	3.84873	1.18272	1.29808	0.182992	0.0709546	0.512654	3.53629	7.37763	0.198345	1.08984	0.448964	8.34655	10.3241	-0.00167078	3.00796	2.70536	3.67609	0.51145	1.69746	2.94742	2.31035	3.67864	6.12521	1.1304	1.12933	2.11061	3.15212	2.50936	4.29619	3.18179	2.00736	1.67628	6.27168	7.83871	0.564607	3.43088	3.03488	3.73758	0.665038	0.136785
t585268	0.70591	2.33374	3.93032	-0.331262	-0.0628342	7.00605	2.37221	6.50167	1.19259	3.60669	2.04606	1.00146	-0.0530963	0.552647	1.36857	1.76592	7.20531	1.90727	-0.0772557	0.456784	6.67319	8.38128	-0.160154	3.41519	0.805249	3.25654	0.437608	1.52228	4.89495	1.17987	2.69671	5.19036	0.419779	1.269	2.07502	1.44299	1.3857	4.74928	3.12776	1.7372	1.58006	4.33845	6.30952	0.314092	4.51437	3.45623	3.44601	1.58126	0.442881
t585281	0.167798	1.93334	1.8724	-0.150657	0.204481	6.76211	1.05922	5.22698	0.530445	6.76771	0.339217	0.725633	-0.02848	0.0261856	0.429169	3.27586	7.77372	1.02065	-0.0397456	2.54806	9.27074	8.04518	-0.160154	4.52667	3.52633	3.91195	0.289443	0.912214	4.50753	1.90331	4.83065	5.28631	0.5814	1.51209	5.79612	2.98472	2.23834	4.34814	4.49037	1.8529	2.55288	5.27887	6.49359	0.54678	3.25126	4.10132	3.33499	3.41189	2.00346
t631052	2.36204	3.03574	5.03504	0.603245	-0.0329341	6.83043	1.80004	5.45258	0.395355	5.72267	1.73175	2.33045	0.0503672	0.32201	1.4008	4.28544	8.23739	1.53162	1.36454	2.49887	8.58604	8.7831	-0.0938276	4.10156	0.759532	3.90194	0.518658	1.54742	4.40808	2.62135	2.85062	5.39295	1.10207	2.42308	5.26373	2.18704	2.39871	6.54796	4.01558	1.94767	1.72895	6.24767	7.68471	0.185516	4.74977	5.22837	4.46526	6.33435	3.01858
t631056	1.02344	2.7844	3.57095	0.00457326	-0.147518	7.04351	1.95282	5.67049	1.49478	6.45186	1.54062	0.856177	-0.0323349	-0.133161	0.442468	3.11505	5.86274	0.0752688	-0.150086	2.13506	8.41996	8.92928	-0.160154	5.78006	2.34337	4.15642	0.166751	1.38022	3.20025	1.35581	3.2805	5.51296	0.580341	2.14876	4.07181	2.64468	3.29238	4.70258	4.87119	3.41565	0.95284	4.38329	7.58153	0.667429	3.6401	3.82888	4.11701	1.87051	0.834061
t631064	0.207128	2.45219	4.55404	1.00071	-0.12578	3.34679	2.49871	5.98146	0.240187	4.69502	2.64794	1.78644	0.0370218	-0.0755526	0.472359	2.15317	8.30996	0.545336	-0.240304	1.77634	8.11475	7.89772	0.156908	3.99014	1.64139	2.73779	1.00316	2.47084	3.30791	1.72742	2.09088	5.00487	0.500334	1.84009	3.08287	2.15022	1.90385	5.36517	3.76942	1.01824	1.79321	3.61183	7.96664	1.1775	4.84768	4.7317	2.98957	3.86788	0.317929
t631092	1.33923	1.86977	5.22986	0.687355	0.254995	7.01692	2.29092	4.36728	1.84367	5.14217	1.71212	1.78578	0.0129207	0.38126	1.46339	3.88217	6.3778	1.5744	-0.0307056	2.14652	8.77985	8.89486	-0.117883	4.29929	1.71343	4.54004	0.666244	2.74601	5.11129	2.31252	0.678912	5.11054	1.4091	1.95059	5.41773	1.45404	1.08431	3.41447	4.54174	0.991293	0.741715	4.48598	6.95542	1.30261	3.76643	2.04392	5.1496	3.51521	2.74772
t134421	0.621042	1.43576	5.63506	-0.331262	-0.132186	7.97779	1.89894	5.16337	0.879112	5.21851	1.58788	0.880894	-0.0145816	0.573016	1.59415	2.68183	5.52882	2.09158	-0.336246	3.481	7.76922	8.43039	-0.160154	4.77519	2.54941	3.31342	1.05529	3.74109	4.25838	1.66889	3.4235	5.00245	1.88773	2.51722	6.15219	4.33998	2.37572	4.66588	5.25549	1.38441	2.32329	6.12965	6.97384	0.286556	3.63448	4.73892	5.84426	4.09789	6.26925
t134417	0.320876	1.95538	3.17831	-0.331262	-0.0215505	7.77511	1.53197	5.37132	2.56586	6.19853	2.0453	0.538852	-0.00971684	0.00909975	0.564534	3.14195	7.02215	1.27701	-0.434695	3.27513	8.49871	8.65956	-0.160154	4.89115	2.02214	3.63692	0.350265	2.36893	7.28742	1.5492	3.23389	4.97514	0.776891	1.43314	5.42392	3.79441	3.38478	4.91444	5.21764	2.17934	2.04925	6.38984	7.43429	0.212354	3.61255	4.08916	4.96055	5.09312	5.0148
S00035	2.33807	1.29637	5.76155	0.29038	0.338853	6.58701	1.84299	5.6737	0.730298	5.49285	1.12896	1.48068	0.327781	0.48799	0.944787	3.28796	6.43672	1.50691	0.3819	2.15068	8.90079	9.68925	0.0896467	4.69159	3.29646	3.81633	0.659362	2.98366	5.87461	4.33856	2.72297	6.81585	1.73695	1.30127	5.53585	1.85646	2.27965	2.11136	3.64524	2.50247	1.7359	3.47985	6.25097	1.77442	4.9659	2.70368	4.399	3.03355	0.830021
S00213	2.23702	1.45662	5.86058	0.277181	0.282169	5.94624	2.37449	5.75826	0.441997	4.40936	3.12009	2.45361	0.112428	0.580882	1.72061	2.51692	5.36355	2.12703	0.704729	0.634029	6.8489	8.1102	0.0896467	3.76406	1.59545	2.96366	0.877842	2.98659	2.51636	2.53436	0.942925	5.19967	1.42432	2.62475	0.183193	1.89264	1.0473	3.50084	3.58198	0.627886	0.992012	3.24828	7.14787	1.3876	3.05466	2.68976	3.63333	1.46978	1.23641
S00356	1.44599	2.98571	5.65696	0.705835	0.447943	6.42444	2.54083	4.52527	0.625704	5.96472	2.8109	4.18829	0.131857	0.768901	1.47743	3.19219	7.03527	1.81652	0.705446	2.90138	6.70907	6.88801	0.140007	4.73357	1.69904	3.70455	1.69027	2.88561	5.87884	2.73776	3.06833	5.3916	2.03121	2.76499	6.3436	2.37907	3.15212	4.81825	4.4158	1.21312	1.31952	3.24823	6.71245	0.802203	4.23027	4.98809	1.75578	4.45228	2.22161
S00472	0.721725	1.06012	4.33745	0.405738	0.468442	7.43559	2.12765	5.17971	2.03757	5.70842	1.51382	1.14722	0.0701633	0.255532	0.996496	2.58054	6.8626	1.37106	0.315889	2.40107	8.01588	8.95249	0.12437	4.28813	1.84474	3.8782	0.698892	2.66551	7.21927	1.8445	2.84442	5.3622	1.59009	1.85089	5.59719	3.54816	2.69008	4.54234	4.28795	2.02547	1.85491	5.40168	7.91083	0.907582	4.04233	2.90501	5.20328	3.94028	2.37418
S00831	1.4606	1.07981	6.26942	0.372255	0.839452	5.06433	2.76506	4.58873	1.08013	4.22211	3.03587	2.59404	0.286098	1.17868	2.41264	2.21717	7.20081	2.09756	0.444309	3.17271	7.42541	8.85107	0.0896467	3.54674	0.802473	4.06363	1.60005	3.90988	5.73807	3.13229	2.51319	5.32776	2.10581	2.36606	3.4965	2.31624	3.11111	3.67868	3.11638	1.197	1.22623	2.65289	5.97119	1.53178	3.2278	2.07406	2.86901	2.05341	0.477804
S00832	0.689004	1.70793	4.61355	0.358081	0.250836	7.02593	2.15914	5.0395	1.35825	6.55077	2.44943	2.35609	0.0332258	0.460875	0.754545	3.96798	7.0141	1.58036	0.327676	1.61292	7.67723	8.18846	0.109927	3.52404	1.15486	3.41079	0.691257	2.16704	5.42238	2.17495	2.62503	4.71134	0.944231	1.72708	5.38387	2.6617	1.26926	4.55711	4.21156	1.46192	1.50445	5.57392	8.0368	0.401226	4.61978	4.90589	4.60425	4.73643	2.20104
S00836	1.36923	0.4152	5.06277	0.769352	0.579331	6.48388	2.77517	4.65918	1.26226	5.08772	1.5304	2.53294	0.295264	0.60063	1.23663	3.47361	6.85456	1.95394	0.263477	3.0166	7.58759	9.42265	0.0896467	4.92624	2.1206	3.81081	1.19091	3.8134	5.55185	1.72306	2.69515	5.53071	2.44574	2.26279	5.4821	3.03311	1.39098	3.638	4.88718	2.37927	1.29742	5.42948	7.26757	1.65485	3.80987	3.98045	3.98226	2.21258	0.378445
S01248	1.90488	2.56985	5.58176	0.313504	0.548889	6.93983	1.99636	4.93073	1.51558	4.84782	1.31326	2.33772	0.244861	0.761213	1.7188	3.07735	7.31449	1.42762	0.650125	1.81964	7.69484	8.31594	0.0896467	4.89916	2.21529	4.81381	0.681637	2.15906	4.21762	2.5841	2.50379	6.00869	1.26858	2.8574	5.36811	2.02446	2.87018	3.91761	3.55152	1.46889	1.73026	4.82126	6.13417	0.602992	3.89694	3.60881	4.1214	3.63971	0.729793
S01297	1.95489	2.18699	5.71294	3.97335	0.316625	7.1414	2.96008	5.22241	0.64067	4.68331	2.30026	1.14893	0.480317	0.333276	1.14125	2.90881	5.66481	2.18374	0.421299	0.410686	6.65993	8.71021	0.200554	2.82738	1.38051	3.221	1.46085	2.16866	4.17813	3.58517	2.61745	6.31193	1.4952	1.86812	0.101735	2.56938	1.71074	4.32481	2.24865	1.25146	1.15524	2.88118	6.67739	0.616401	3.94115	3.03289	1.23995	3.38852	0.150384
S01366	0.383805	1.35165	3.39424	0.214016	0.494826	6.1995	2.41412	5.82309	3.00184	5.23861	1.76742	1.38728	0.0975446	0.181639	0.793747	3.73545	6.77882	0.617224	0.238777	0.701164	6.43405	8.64204	0.106878	4.9385	2.48132	4.04272	0.431156	1.76965	3.01895	2.18905	2.30569	6.54171	0.500472	1.95751	3.19718	0.0713429	2.08812	4.51481	3.41505	2.66326	1.63783	3.61125	6.97731	0.368463	4.14304	2.78649	4.63958	1.14235	0.0551807
S01512	0.410246	1.89286	4.1295	0.30641	0.265134	7.64763	1.28366	6.26988	2.05262	5.12272	1.73585	2.03265	0.0604782	0.265627	0.528936	3.17079	8.04414	1.3283	0.276182	2.57844	8.87416	8.20221	0.106424	4.05955	2.5238	3.93253	0.479834	1.8221	7.19922	2.46949	2.87217	6.61586	1.80288	1.35367	4.31377	3.77392	2.6817	5.39397	3.11698	1.75595	1.42768	4.99265	7.31572	1.24931	4.47693	3.66559	4.10052	2.36195	2.01193
S01698	1.57626	1.3622	5.43859	0.310788	0.398868	6.23885	2.22303	5.20351	1.96783	4.27681	2.08582	1.60968	0.0791551	0.266628	1.45117	1.55497	6.93831	1.69277	0.425213	3.4127	6.31122	8.90967	0.111589	4.4391	0.522915	3.74822	0.969845	3.55204	6.22079	2.01536	2.79329	4.80211	1.87436	2.39387	4.97033	2.15372	2.51578	3.90518	4.34372	1.22948	1.8014	5.3706	7.24489	1.40039	3.86013	3.51541	4.60942	3.87092	3.11003
S01792	1.4642	3.4043	6.98205	0.502228	0.627696	6.51459	2.21107	4.94099	0.483477	5.64394	1.48924	2.46807	0.0564733	1.67003	2.18599	3.47846	7.43476	2.33838	0.33558	3.84326	8.10028	8.26349	0.111677	3.74165	1.96511	3.511	1.95215	3.98238	4.63099	1.3622	2.26952	5.49718	1.33768	2.15215	5.9565	3.10237	3.24347	4.03625	3.26975	1.65044	2.29195	4.61919	7.25822	1.4044	4.43091	3.60815	5.434	3.90226	3.79787
S01861	2.272	3.09662	5.83905	0.905641	0.885374	6.15515	1.94596	5.13789	2.80301	5.40917	2.07274	1.46482	0.150913	0.667277	1.68364	2.40127	6.53309	2.23181	0.528751	1.37306	8.87773	8.41644	0.0896467	4.07968	1.09478	4.39467	0.557204	2.81652	5.75713	3.94869	1.61657	6.20343	1.8065	2.26919	5.24812	1.73897	2.38437	3.83654	3.29772	1.15437	1.46958	3.23958	5.92303	0.801538	4.33125	1.53819	3.1102	3.59302	2.33657
S01873	2.45243	0.975073	6.79701	0.345861	0.181892	2.46913	3.15213	4.28996	-0.041423	5.18945	3.08771	1.9033	0.0440881	0.868092	1.98922	3.21589	6.17847	2.78135	0.505294	1.19129	6.32024	1.659	0.0896467	3.0356	0.0765031	1.69756	0.982289	3.39496	3.66529	2.96847	2.51901	4.81277	2.04016	2.94273	3.4769	0.898447	1.14987	5.04051	3.30705	0.965356	0.896076	1.95842	7.11298	1.1627	4.69757	3.96443	1.89864	4.01771	0.0493444
S02120	1.19448	1.50511	4.38718	0.347318	0.533347	6.7793	1.7988	5.73186	0.324907	5.24281	4.24514	0.930558	0.0766635	0.290893	0.983713	4.34148	6.57154	1.24197	0.261504	2.36979	8.63533	9.01715	0.0896467	3.62421	1.25249	3.77528	0.901872	2.15673	3.96408	1.6201	1.5919	5.33631	0.936654	1.78431	4.44613	3.20475	2.23862	2.01414	4.39451	1.99248	1.85415	3.31107	7.38074	0.32181	4.31691	3.61908	3.96501	1.10209	2.17339
S02194	2.15755	2.52005	7.23434	0.946724	0.179898	0.574734	2.10621	4.33206	0.533453	5.24831	2.51501	2.71483	0.0468954	0.921897	2.4167	2.45528	7.68403	3.6517	0.267133	3.18707	7.85502	5.7364	0.187805	1.7719	0.228826	2.74917	2.01037	4.324	1.08318	2.76335	1.39001	5.29876	1.58936	3.79642	2.83877	2.13975	0.970993	4.25007	2.17671	0.868965	0.170779	3.49326	5.7791	0.422959	3.8854	3.78338	2.42363	3.025	0.424982
S02234	1.60544	3.00357	5.13555	0.743393	0.4947	6.70047	1.85219	5.35091	0.598775	6.0319	2.87943	2.05274	0.146875	0.420027	1.24652	2.47305	7.3906	1.69109	0.590666	3.15302	7.15721	7.44676	0.0896467	3.46597	1.36004	3.39653	1.02263	3.51075	7.05076	1.92772	3.8554	5.50483	1.35388	2.3506	5.48715	3.68671	2.65115	5.1902	3.62026	0.27775	0.223518	4.97881	8.40842	0.531273	3.62201	4.60992	4.25672	4.13193	2.45534
S02241	0.578916	2.39253	4.16664	0.540725	0.185707	6.58619	2.44699	5.56601	2.15541	4.62897	0.721035	1.49309	0.0332258	0.226535	0.716399	2.94427	8.61751	2.10773	0.238777	2.99937	8.83453	7.99349	0.131011	2.41424	1.6631	3.11181	0.267188	1.24767	5.32311	1.5251	1.26966	5.79705	0.325574	0.839796	4.83493	3.10287	1.14786	5.35658	3.09735	0.909559	1.35737	3.52748	7.55994	0.424701	4.71208	4.42181	4.96802	4.59745	6.01787
S02242	1.86155	1.98283	5.54608	0.675957	0.658643	6.29263	1.82007	5.79287	1.50936	5.31092	1.73182	2.49253	0.123048	0.962581	1.22502	4.83878	8.08616	2.80615	0.460728	2.17815	7.6398	6.50229	0.0896467	3.03243	0.0839166	2.26419	0.682245	2.13	3.70762	2.67061	2.30509	5.35002	1.22822	2.06539	5.18786	3.111	1.9969	5.27705	3.14456	1.26773	1.53673	2.25206	6.31473	1.13893	4.53456	3.80876	2.70305	4.64201	2.9481
S02243	1.15697	1.61772	4.20893	0.731608	0.336139	2.67738	1.84624	3.85992	-0.0439476	5.26479	1.26367	1.71274	0.109872	0.568998	1.31651	3.05492	6.31138	1.81002	0.259236	2.13242	5.52738	6.13382	0.0896467	4.01442	0.0888214	2.23139	0.550134	1.53611	3.82334	1.67874	2.27779	3.8394	1.06976	2.16942	3.91866	1.49133	2.3477	3.90312	3.91015	1.80538	2.11351	4.02972	6.25501	0.554067	3.60795	5.46567	2.61176	3.6596	0.249215
S02244	0.763841	2.19648	4.91996	0.740742	0.272584	4.85499	1.87206	5.6277	1.97912	5.86947	2.43745	2.14167	0.120997	0.406685	1.28962	1.66684	6.61609	1.44675	0.395914	2.27649	7.83967	8.41105	0.0896467	4.75199	1.65258	3.79113	0.785055	2.65534	6.05387	2.25898	2.33222	4.77759	1.21137	1.52399	6.06144	2.42968	1.95588	3.22309	3.33152	0.834312	1.63308	4.28655	6.7327	1.0627	3.47042	4.14306	3.70196	3.09764	1.51588
S02248	1.60086	3.02029	4.92122	0.423746	0.490151	6.25889	2.15138	5.40808	0.7053	5.39943	1.23183	0.879556	0.049881	0.280214	1.16682	2.66574	8.07636	1.34668	0.701497	3.31137	7.7672	8.54895	0.221925	4.20486	2.51711	3.25447	0.484019	1.99014	6.96706	2.66572	3.28079	5.49084	1.06501	1.75394	5.41388	2.98267	2.90034	4.37801	3.99026	1.90377	1.61343	4.5101	7.4597	0.695208	4.42969	3.55865	5.20973	4.92745	4.84981
S02284	1.55027	1.85804	5.2133	1.01583	0.926102	6.61926	2.33356	4.54831	0.649913	5.48006	2.63003	3.66998	0.444204	0.370002	1.65542	3.08852	6.24883	1.67995	0.698448	2.01565	6.54498	7.44609	0.127067	4.8229	1.44469	3.39132	1.35101	3.01917	5.52146	2.6846	2.42605	4.88407	2.25794	2.80275	4.8202	2.72888	2.45816	3.66352	5.27842	1.9516	1.27887	5.22294	6.78529	1.64716	3.64003	4.0097	5.27728	3.00301	3.61038
S02285	0.532197	1.40314	2.66277	0.304839	0.359902	6.34596	1.92781	5.62723	2.8044	4.74568	3.95505	0.91484	0.0332258	0.168232	1.33016	2.4739	5.91829	0.778296	0.238777	3.99662	6.58131	8.31817	0.107792	4.5347	0.887124	2.97091	0.529778	1.96589	2.55252	1.60711	2.7903	5.49376	1.59399	0.817618	2.51237	3.02527	4.05885	4.56995	5.40674	2.906	1.40849	5.38132	6.57934	0.683987	4.30763	3.15073	4.46741	1.22701	0.319028
S02289	0.568691	3.40819	4.144	0.357405	0.524302	6.00384	1.11062	4.32968	1.96687	6.11321	3.25929	1.65398	0.13277	0.345926	0.827401	3.42053	6.35651	1.38587	0.238777	2.6071	7.78086	8.45375	0.108826	4.10445	0.480901	2.81694	0.754381	2.38037	5.09368	1.82388	4.55974	4.58311	2.30629	1.3166	3.83585	3.79029	2.19851	4.28739	4.9205	2.04226	1.69124	5.90707	7.08998	1.00565	3.98966	4.24665	4.33113	3.64868	4.39944
S02290	1.36259	2.68847	4.07732	1.30822	0.588727	4.96559	2.66909	4.8633	1.50107	2.99251	3.36773	1.20053	0.53821	1.16221	3.11112	1.21814	7.03459	2.16432	0.346117	2.98447	6.58625	7.13403	0.0896467	3.69679	0.0560806	3.52829	1.7345	2.12498	2.37271	3.6784	4.72114	5.33115	2.77316	2.21789	3.95704	0.0829889	3.9894	3.05793	1.8905	1.78604	1.91407	3.09313	4.0755	1.05913	3.75345	1.50537	1.63855	4.43965	2.8438
S02291	1.79299	1.1885	5.69958	1.38817	0.598577	3.29747	2.50416	3.71514	1.88861	4.41041	2.85491	2.44008	0.166459	1.47112	2.08435	1.87068	6.0246	2.27925	0.587319	2.61774	6.42912	8.18679	0.0896467	3.76007	0.402597	3.78529	1.95681	3.1357	2.68289	3.36409	2.20373	5.21231	1.58857	2.33194	3.59229	1.62883	3.06103	2.18678	2.56339	0.897752	0.474404	3.58619	5.45866	1.62564	3.45683	0.984273	1.92858	3.58777	0.71981
S02295	0.742778	1.35904	3.74126	0.476804	0.299374	6.02541	1.95768	4.8958	0.565788	4.02296	1.84504	1.66825	0.0635924	0.295289	0.749648	2.34254	6.48109	2.25148	0.259837	2.71428	6.01749	8.31809	0.1084	4.50071	0.581555	4.10273	1.26472	2.24765	3.26197	2.01366	3.10142	4.16583	1.10302	1.67138	3.82635	3.32598	3.37146	4.89654	4.80383	1.72581	1.57949	6.52673	8.00956	0.604575	3.68171	4.02639	3.8387	3.68312	0.830024
S02322	1.11561	2.00807	4.85957	0.628432	0.441951	6.24965	1.37842	5.25455	0.295205	4.61841	0.861928	2.97231	0.0877292	0.367378	1.34976	3.55242	6.15926	1.20392	0.450787	1.69759	6.85218	6.16596	0.180048	3.83792	3.13111	3.03156	0.368966	2.05481	3.13198	2.57532	4.69626	5.57308	0.905735	0.79844	4.64329	2.01265	2.36833	4.2556	3.45531	1.75812	1.6832	3.34113	6.36641	0.962296	3.93518	4.06697	2.72629	3.64001	2.85943
S02347	2.8642	2.16116	4.93555	0.3728	0.174603	5.52331	2.99797	4.3073	1.40589	4.46847	2.45918	0.837513	0.279265	0.251765	2.10382	2.41546	7.11334	1.86556	0.688043	1.93105	5.93479	7.27125	0.0896467	3.64581	1.11941	3.58294	0.777612	3.05457	4.00214	2.13792	2.05609	3.83365	1.32683	3.15713	5.78224	2.33083	2.37542	3.93396	4.64027	1.95838	1.7457	5.77794	6.17595	0.837732	2.59088	3.77463	3.3132	3.19367	1.33083
S02354	1.42175	1.10889	4.39797	0.446053	0.441406	6.52785	2.64671	6.02248	0.85752	4.09985	2.19155	0.599453	0.0769389	0.642083	1.43896	2.52404	7.46489	2.28989	0.51292	3.49887	6.7096	7.88242	0.0896467	4.67025	0.897876	3.03088	1.26709	3.29489	3.27059	1.55594	3.7657	5.161	1.41779	2.5143	5.07772	1.82897	3.1262	4.959	4.4259	1.93091	1.81887	6.88934	6.67337	0.52067	3.19335	3.3924	4.16023	4.21439	3.22343
S02360	0.785457	1.98477	4.95684	0.301823	0.386949	6.91807	1.90335	5.78571	0.33996	6.30359	1.91391	2.0502	0.0544177	0.238177	0.878408	3.64877	7.91081	1.86805	0.30415	3.15399	8.16788	8.07264	0.0896467	3.93249	1.25846	3.32177	0.787866	2.3217	5.59573	1.91049	2.15184	5.51464	1.26576	1.60205	5.58051	3.4128	3.26009	5.51384	4.82943	2.42638	2.04967	5.6273	7.915	0.650867	4.66008	5.60512	5.04504	6.01323	3.6036
S02376	1.37766	1.81353	5.50499	0.286719	0.635179	6.87786	1.53641	6.18228	0.137421	4.62499	3.1385	2.85977	0.0787015	0.331312	1.35027	1.97334	8.39082	1.34753	0.394791	2.03669	7.87541	9.18425	0.152103	3.29851	1.58533	3.46395	0.962514	2.48195	5.2887	3.11096	3.73385	6.30183	1.46646	1.68867	2.99774	3.44437	2.27826	3.95643	2.73265	1.16157	1.30931	3.98985	7.25662	0.926145	4.22664	3.06719	3.29359	1.80419	0.794591
S02397	1.24017	1.85404	5.01857	0.346198	0.469243	6.40582	1.43555	5.04236	1.02918	4.61444	2.31985	2.30001	0.125015	0.212124	1.05612	2.70871	5.28662	1.42783	0.538615	1.45813	7.09082	8.25967	0.129207	4.029	1.5297	3.27553	0.548649	2.56432	6.35541	2.56444	1.72244	5.57672	1.47572	1.73344	4.98052	2.27731	2.85509	3.66989	4.95744	1.16537	0.940024	5.52304	6.35534	0.541531	2.87054	3.43874	4.28525	3.11159	2.7859
X45LC	1.23911	0.249912	4.32541	0.115786	0.783089	1.35469	3.50114	5.77141	-0.0140774	3.3987	2.85254	2.34841	0.0462116	-0.147342	2.28283	2.18886	5.5296	3.11333	0.204989	2.08892	7.5917	0.972787	0.0691788	2.73828	0.226291	2.1069	1.17402	3.08834	2.2114	3.19663	2.57609	4.96109	1.77765	1.78846	2.89714	0.512015	2.97822	1.32103	3.46398	1.18994	1.26231	3.58447	7.11752	1.25493	3.59619	0.97229	3.53137	1.52915	0.21266
t98711	0.322024	-0.121829	7.44355	1.42885	1.71052	0.0738156	2.18996	3.81042	1.37115	3.42941	5.65345	6.64148	-0.0210609	4.1819	3.72236	2.65994	4.19045	3.94244	0.00421177	0.604675	6.77471	6.695	-0.160154	1.313	0.218842	1.7653	2.37982	4.59806	0.172895	2.86044	1.71462	5.59911	3.83093	2.20722	1.63617	0.75586	1.6071	0.521175	1.68463	0.252839	0.873401	-0.019584	3.65885	4.83246	3.13861	0.992482	3.65605	3.48764	0.0120565
t134413	1.13387	2.72314	5.33678	0.754143	0.926384	5.55805	3.4538	5.46992	0.240187	4.54937	1.99072	1.74645	0.00191329	1.08794	1.51198	3.36966	5.29295	1.9403	0.456044	4.5782	7.58609	4.64811	-0.160154	4.24719	-0.0567733	2.72917	1.22428	3.8803	4.30871	2.01282	2.64317	4.38175	3.08285	3.03938	4.34148	1.55378	2.54548	4.34099	5.2562	1.0665	1.5452	3.16237	6.44989	1.24868	4.64178	3.28514	4.6855	3.83196	0.0930518
S00050	1.122	2.33202	3.88487	0.760869	0.519072	5.9774	2.20246	5.29731	2.38488	6.49868	1.55411	0.471515	0.0845204	1.55085	0.854365	3.78854	7.83662	1.39939	0.33865	4.67979	7.27964	7.03691	0.136369	4.14908	1.29061	3.67896	0.707445	2.59573	4.96866	1.78611	3.65641	4.83151	0.938731	2.90426	7.02069	3.10443	3.93426	6.23505	4.87519	2.26102	2.88273	5.60833	7.20313	0.667077	3.78085	4.60792	3.64544	4.8741	3.29125
S00830	2.50433	2.80682	5.43714	0.718876	0.185401	5.86885	3.36511	4.61841	1.47568	4.84482	2.68757	0.77902	0.0813781	0.260408	1.7868	3.55274	6.61467	2.55708	0.287915	4.28786	8.32923	6.47565	0.133541	4.04263	0.0803347	2.88623	0.87919	3.81667	3.58879	2.02325	2.1252	4.77998	1.90789	3.46261	5.43847	1.75783	3.92863	5.12181	4.20644	2.21614	1.35392	5.26879	7.72764	0.816864	3.66288	4.25345	4.36879	3.82087	3.89796
S00838	1.61229	1.92258	6.7961	1.27143	0.768583	4.32313	3.60762	5.36957	0.231454	5.74475	2.58824	2.41657	0.110023	1.04019	1.81807	2.96755	6.69069	1.79551	0.580514	2.56667	7.27211	7.02775	0.0896467	2.40416	0.14629	3.90685	0.859896	3.0088	6.14102	3.41633	1.69799	3.92289	2.26079	2.97555	6.66587	2.44351	2.94027	3.77585	3.73667	1.63259	1.36809	4.63453	6.44382	2.06819	3.26639	2.93398	2.55943	5.08753	2.2896
S01242	2.23046	1.98283	6.00234	0.403971	0.400332	2.92986	3.11239	5.1389	-0.0719782	5.80691	2.95786	2.97637	0.0995769	0.732959	2.10618	2.60474	7.34989	1.48782	0.755704	2.92041	7.32202	7.61534	0.0896467	2.55351	0.326664	3.21286	1.18554	2.66255	4.00556	2.77732	4.22538	5.56819	1.97937	2.89925	5.76825	2.75239	2.04467	3.45219	3.31379	1.72677	1.87032	4.18963	7.44365	0.775611	4.27953	5.6316	3.65883	4.1587	-0.0275525
S01494	0.799762	2.49234	3.50225	0.21715	0.196539	2.66356	0.937943	7.71299	-0.0719782	5.56946	3.66306	0.372517	0.0332258	0.34703	1.07783	2.42359	5.56133	0.966285	0.264903	3.97585	7.404	2.3927	0.0896467	1.53271	0.0416394	3.52961	1.34104	3.70737	0.135866	3.76579	2.65811	4.91957	2.2145	4.03969	3.85548	2.40677	2.10976	5.00281	3.45388	1.93377	0.479935	0.245317	4.10885	0.24279	4.30183	3.22606	2.85371	1.27991	-0.0275525
S02139	0.866451	2.02639	4.47504	0.862174	2.23737	0.960734	4.32768	5.06296	-0.0719782	5.65023	4.40556	2.31623	0.044007	0.366356	1.93083	4.78287	7.70916	3.50382	0.261089	5.23292	8.30438	2.72252	0.951236	4.83762	0.367599	2.97503	1.10841	2.43239	5.72138	2.44715	1.71116	5.61791	1.34677	2.31353	6.05388	1.0221	4.47581	4.39785	4.06491	1.99392	0.237376	3.12906	6.4287	1.77468	4.34297	5.74808	2.21222	0.862738	0.0902965
S02163	1.14336	2.90915	4.32349	0.471346	0.288936	3.82912	2.8222	5.08918	0.230238	5.5985	1.02281	2.48692	0.0425319	0.830853	0.659905	4.06369	8.17075	1.86433	0.295674	4.03361	8.17412	5.86551	0.0896467	2.46951	2.47953	3.45934	1.78697	2.35465	4.5821	3.04594	2.48265	4.58603	1.82232	2.72097	5.02774	2.70529	3.32279	5.36949	4.08353	1.78207	1.84118	2.13539	7.52744	2.76278	4.45484	3.01933	4.22382	2.50293	1.07579
S02294	0.63141	2.46492	2.66915	0.768226	0.346666	5.61245	3.11082	5.14336	-0.0410702	5.90468	3.54355	0.505948	0.0332258	0.189776	0.927453	3.89286	8.28853	2.22419	0.238777	4.10879	8.35999	4.30949	0.0896467	3.37684	0.0416394	2.99493	0.704296	1.35581	3.71785	1.65668	2.72467	5.22286	0.784457	2.85001	6.09029	2.36533	3.47241	4.44865	3.73066	2.45245	2.52299	5.62588	6.93563	0.332427	4.60507	4.32367	4.42034	5.38952	1.00969
S02297	0.746794	1.46324	4.07102	0.564851	0.457021	5.90999	2.27296	5.34682	2.91144	4.49353	1.63876	2.19692	0.221154	0.223265	1.00967	3.77064	3.96661	1.07078	0.276059	0.545339	9.7446	7.61605	0.0896467	3.51521	1.66436	2.34925	1.14521	2.54994	1.23295	2.39638	3.48174	5.43384	1.97234	1.58054	4.60447	2.86508	3.92574	3.22362	4.21715	3.06132	1.23661	6.3911	6.43021	0.912263	3.50483	3.23792	3.07042	1.17832	0.903049
S02298	0.768295	0.125112	8.38372	0.408092	3.40823	0.129626	2.43219	0.934494	-0.0431838	3.66141	5.20301	3.04411	0.0639314	0.495689	3.8045	4.5681	4.1899	3.82056	0.437581	0.31757	3.76276	0.520175	0.381707	1.22037	3.00867	0.951108	3.03452	4.92309	0.452804	2.29894	1.59948	3.89569	2.43499	2.76256	0.226846	0.0847456	0.170429	0.188211	0.448755	-0.0444204	0.170138	0.506973	0.567981	0.710389	3.12249	0.271985	3.50194	0.232458	-0.0275525
S02342	1.2396	4.33906	3.87876	0.701559	0.173945	3.3413	2.74008	6.16191	1.17372	5.95777	0.970293	0.457079	0.056618	0.336116	1.33385	3.86494	7.54522	1.01394	0.238777	3.92596	7.88489	6.80237	0.0896467	3.98417	0.0416394	3.92758	0.440583	2.02144	4.11945	1.92645	2.60693	4.92139	0.682654	2.38021	5.99089	2.67489	3.13963	4.83474	4.57199	3.00702	1.10026	6.30232	6.69166	0.195812	3.96654	4.77954	4.33776	4.44564	3.76005
S02350	2.75426	2.53254	6.40987	0.649089	0.60893	0.748214	3.68628	4.92731	-0.00745785	5.44032	2.59106	2.10291	0.425784	1.45614	2.4088	3.20935	7.30694	2.35579	0.903214	4.58845	6.73906	4.85553	0.202236	4.1137	0.132244	2.37421	1.10786	3.89293	4.09729	2.67019	2.21896	5.20535	1.62728	3.76059	5.6461	0.130292	2.73135	4.83043	3.84805	1.02711	0.202648	1.80311	6.64388	1.89512	4.27258	5.17422	3.155	3.23449	0.09854
S02378	1.83853	2.8031	6.40478	1.82688	1.32719	3.14105	2.63899	5.39499	0.315105	4.34004	1.7148	3.53916	0.402788	2.22177	1.93655	2.57369	6.61994	1.25806	0.933422	2.24609	6.78111	6.71978	0.199159	3.27736	0.22827	3.27031	1.29601	3.29072	4.73988	3.71392	1.36773	5.17254	1.6154	2.79103	4.99698	1.73677	1.87914	2.51379	2.30479	1.46282	1.85661	3.9711	5.80052	1.46559	3.914	1.08019	2.56852	3.77655	0.555561
X1452LC	-0.0950048	3.02686	3.19624	0.0434093	0.25217	7.63633	0.555677	5.74009	1.93403	5.8619	1.39361	0.559216	0.065972	0.279742	0.336928	3.28013	7.94783	0.989714	0.0569134	3.4944	7.62051	8.85623	-0.0387964	4.54066	1.06512	2.95346	0.771432	1.66307	4.77205	1.94609	3.74206	5.34284	0.265133	0.509674	6.61127	4.01286	4.02522	5.78085	5.32651	2.38748	1.92779	6.8696	8.44534	0.144273	3.90093	4.13654	6.09451	5.87738	3.92169
X790LC	0.756874	2.5808	6.61521	0.850569	0.783396	4.04014	2.01818	4.24911	2.39107	5.43278	1.85838	4.64863	0.421176	0.833247	1.64066	2.84729	7.72152	3.35244	0.460877	3.65528	7.92935	7.69922	0.14048	2.35044	0.163498	3.04883	2.22137	4.71721	4.85605	2.636	2.1352	5.11317	2.82318	2.97028	4.46711	2.32174	2.50175	3.69337	2.34993	1.80669	0.34218	4.09325	6.31528	1.21961	3.0947	1.39752	4.3029	2.93153	1.09208
t134426	0.632925	2.79342	5.27594	0.821623	0.339078	5.42735	3.15687	5.87502	2.37619	4.93709	0.828447	3.2702	0.252589	0.281972	1.22174	3.71094	8.35168	0.532201	-0.0445772	5.33219	7.93528	6.1922	-0.0196236	4.78422	-0.108596	3.67346	1.67116	2.81699	5.75268	2.78159	2.76112	5.23094	1.33783	2.64851	6.84627	3.14399	5.3587	4.99738	4.57498	3.37019	1.66332	6.35301	6.58572	0.686687	3.90781	5.52911	4.28021	5.10266	1.33431
S01524	0.952586	2.11537	4.5846	1.11954	0.904768	4.33363	1.16205	5.213	0.880417	5.09181	1.08032	1.84126	0.192482	0.495134	1.12109	3.70934	8.72615	2.18912	0.307289	3.14282	7.76432	8.17894	0.110308	3.49712	0.894646	3.7833	1.04708	1.45479	3.85469	3.74896	2.27095	5.49524	0.688239	1.16561	3.16753	3.20716	1.96443	4.73893	2.98533	1.05194	1.482	1.59098	6.83666	1.69358	4.28721	0.669869	3.38139	3.2318	1.47609
S01728	0.632789	3.50317	5.68642	0.616827	0.898208	7.49004	3.23149	4.70083	2.53976	5.53404	1.77172	3.21233	0.258567	0.963502	1.27665	2.92514	7.034	1.7219	0.314188	2.97475	9.17893	8.872	0.178276	5.28328	2.05581	3.98214	1.3481	3.8406	4.48683	3.06748	2.36088	4.70386	3.09709	2.03178	5.57793	3.28447	2.52274	4.60957	4.60094	1.54912	1.67859	3.42296	7.03508	2.35181	3.90667	2.76933	3.24764	1.96805	2.175
S02352	1.94841	0.138803	4.84205	0.945891	0.304535	6.42409	1.90305	5.12987	3.25168	4.86091	1.20949	1.94147	0.0910296	1.38898	1.54751	3.44624	7.24108	1.36546	0.28732	4.32356	7.40208	7.43296	0.204846	4.60669	0.364825	3.52511	1.34307	2.40868	4.17602	2.64742	3.48852	5.0011	2.24523	2.38499	6.17607	2.36585	4.02713	4.6825	3.406	1.93352	1.90016	6.75178	6.22986	0.697614	3.51945	1.63895	3.24044	4.76333	2.24711
S02353	0.72692	0.0851747	4.25696	0.398075	0.299144	6.99073	2.61251	6.09637	3.51546	4.31546	1.50522	1.08801	0.395816	0.407001	1.19423	3.51675	4.03924	1.22922	0.238777	1.07856	9.4317	7.73862	0.0896467	2.98211	1.61898	2.69722	1.38018	3.11811	1.21531	3.37648	1.95228	5.11036	1.91876	1.52044	4.22167	1.84789	4.31548	4.4271	4.21686	2.73133	1.60494	5.40579	6.3751	1.03832	2.61894	3.25706	3.54909	0.284705	0.562234
[truncated: 411 more columns]
