# Supplementary figures and images for: Integrative analysis of multi-omics data reveals the heterogeneity and signatures of immune therapy for small cell lung cancer
Source: Research Square preprint supplement (doi:10.21203/rs.3.rs-148857/v1), 2021-01-22

**a**

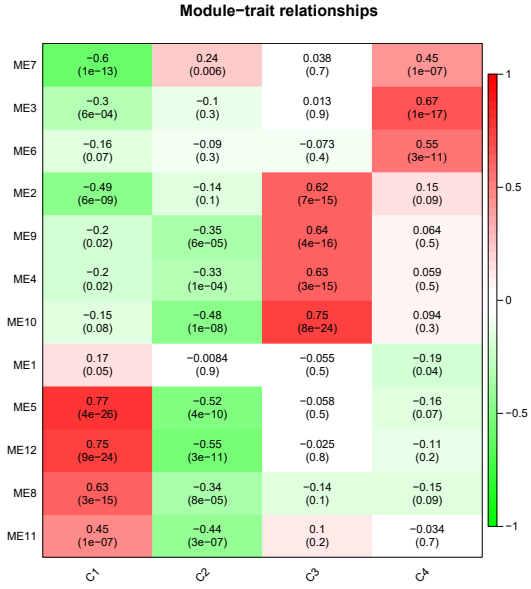

**b**

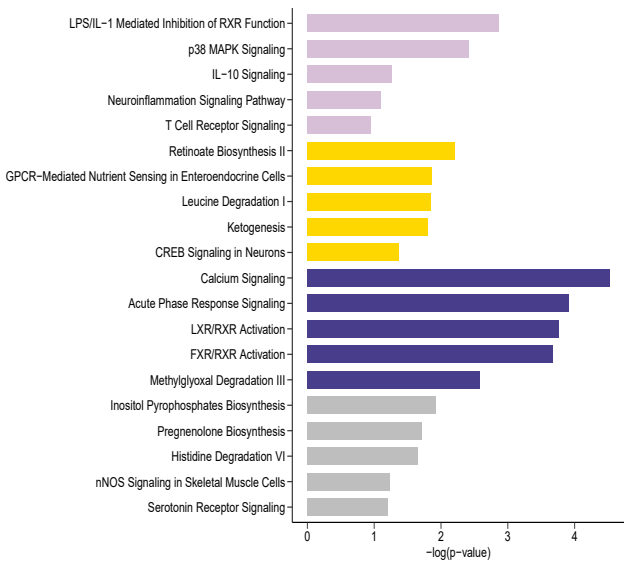

**c**

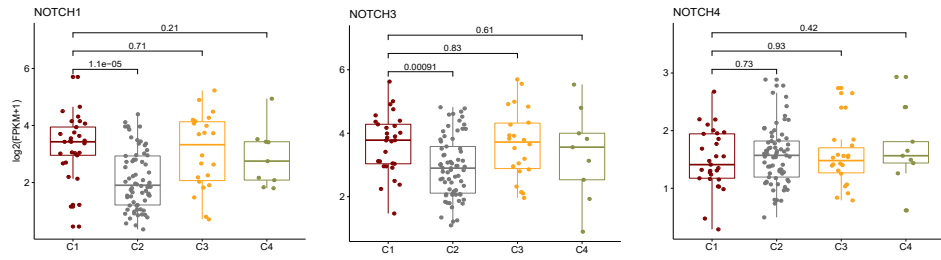

**d**

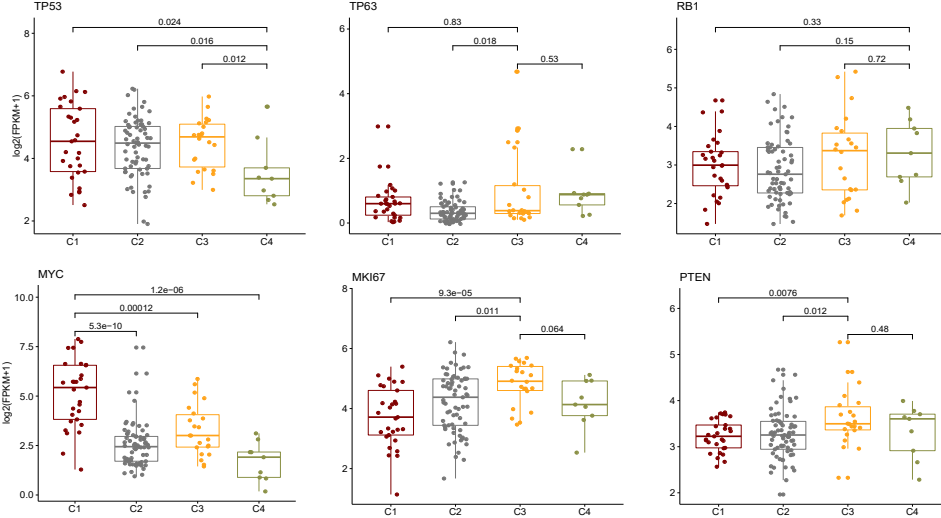

**e**

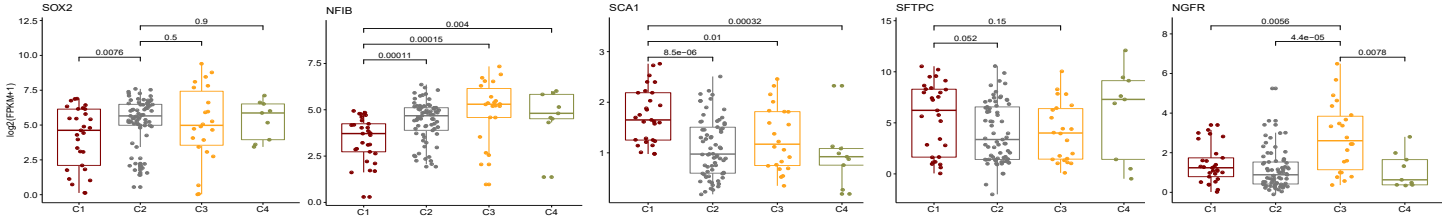

Supplement: Supplementary file 1 [file b8521c535cac2e7148ae360d.pdf]
